# Supplementary material for: Long-term strain improvements accumulate mutations in regulatory elements responsible for hyper-production of cellulolytic enzymes
Source: PubMed Central journal article supplement — Sci Rep. 2013 Mar 28;3:1569. doi: 10.1038/srep01569 (PMC3610096; doi:10.1038/srep01569), 2013-03-28
Supplement: srep01569-s1.pdf [file srep01569-s1.pdf]

## Supplemental Information

### Long-term strain improvements accumulate mutations in regulatory elements responsible for hyper-production of cellulolytic enzymes

Guodong Liu<sup>1#</sup>, Lei Zhang<sup>2#</sup>, Yuqi Qin<sup>1,3#</sup>, Gen Zou<sup>2#</sup>, Zhonghai Li<sup>1#</sup>, Xing Yan<sup>2</sup>, Xiaomin Wei<sup>1</sup>, Mei Chen<sup>1</sup>, Ling Chen<sup>2</sup>, Kai Zheng<sup>1</sup>, Jun Zhang<sup>2</sup>, Liang Ma<sup>2</sup>, Jie Li<sup>1</sup>, Rui Liu<sup>2</sup>, Hai Xu<sup>1</sup>, Xiaoming Bao<sup>1</sup>, Xu Fang<sup>1,3</sup>, Lushan Wang<sup>1</sup>, Yaohua Zhong<sup>1</sup>, Weifeng Liu<sup>1</sup>, Huajun Zheng<sup>4</sup>, Shengyue Wang<sup>4</sup>, Chengshu Wang<sup>2</sup>, Luying Xun<sup>1,5</sup>, Guo-Ping Zhao<sup>2,4\*</sup>, Tianhong Wang<sup>1\*</sup>, Zhihua Zhou<sup>2\*</sup> & Yinbo Qu<sup>1,3\*</sup>

<sup>1</sup>State Key Laboratory of Microbial Technology, Shandong University, Jinan, Shandong, China.

<sup>2</sup>Key Laboratory of Synthetic Biology, Institute of Plant Physiology and Ecology, Shanghai Institutes for Biological Sciences, Chinese Academy of Sciences, Shanghai, China.

<sup>3</sup>National Glycoengineering Research Center, Shandong University, Jinan, Shandong, China.

<sup>4</sup>Shanghai-MOST Key Laboratory of Disease and Health Genomics, Chinese National Human Genome Center at Shanghai, Shanghai, China.

<sup>5</sup>School of Molecular Biosciences, Washington State University, Pullman, WA, USA.

# These authors contributed equally to this work.

\* Corresponding authors: Y.Qu (quyinbo@sdu.edu.cn), Z.Z. (zhouzhihua@sippe.ac.cn), T.W. (wangtianhong@sdu.edu.cn) or G.-P.Z. (gpzhao@sibs.ac.cn).

## Contents

|                                                                                                                                                                |    |
|----------------------------------------------------------------------------------------------------------------------------------------------------------------|----|
| <b>Table S1.</b> Statistics of genome sequencing and assembly of <i>P. decumbens</i> JU-A10-T. ....                                                            | 3  |
| <b>Table S2.</b> Statistics of predicted gene models in <i>P. decumbens</i> JU-A10-T. ....                                                                     | 4  |
| <b>Table S3.</b> Transcription factors with amino acid sequence variations between <i>P. decumbens</i> 114-2 and JU-A10-T. ....                                | 5  |
| <b>Table S4.</b> Genes in strain-specific genomic regions of <i>P. decumbens</i> 114-2 and JU-A10-T. ....                                                      | 14 |
| <b>Table S5.</b> Cellulases and hemicellulases with amino acid sequence variations between <i>P. decumbens</i> 114-2 and JU-A10-T. ....                        | 22 |
| <b>Table S6.</b> Secreted proteins identified by LC-MS/MS and 2DE-MS/MS in <i>P. decumbens</i> . ....                                                          | 24 |
| <b>Table S7.</b> Statistics of digital gene expression profiling in <i>P. decumbens</i> 114-2 and JU-A10-T. ....                                               | 30 |
| <b>Table S8.</b> Manually checked sequence variations in cellulase gene promoters between 114-2 and JU-A10-T. ....                                             | 31 |
| <b>Table S9.</b> Gene ontology (GO) enrichment analysis of genes of significantly differential expression between <i>P. decumbens</i> 114-2 and JU-A10-T. .... | 34 |
| <b>Table S10.</b> Transcription levels of genes involved in pentose metabolism, central metabolism and intracellular cellodextrin metabolism. ....             | 49 |
| <b>Table S11.</b> KEGG annotation of amino acids biosynthesis-involved enzymes significantly up-regulated in JU-A10-T. ....                                    | 52 |
| <b>Table S12.</b> Transcription levels of genes involved in protein folding in <i>P. decumbens</i> 114-2 and JU-A10-T. ....                                    | 54 |
| <b>Table S13.</b> KEGG annotation of oxidoreductases significantly down-regulated in JU-A10-T. ....                                                            | 55 |
| <b>Table S14.</b> Transcription levels of secondary metabolism gene clusters in <i>P. decumbens</i> 114-2 and JU-A10-T. ....                                   | 69 |
| <b>Figure S1.</b> Schematic diagram of scaffold mapping. ....                                                                                                  | 78 |
| <b>Figure S2.</b> Genetic variations between strains 114-2 and JU-A10-T. ....                                                                                  | 80 |
| <b>Figure S3.</b> Characters of the secretome of <i>P. decumbens</i> JU-A10-T grown in cellulose-wheat bran medium for 48 h. ....                              | 82 |
| <b>Figure S4.</b> Carbon catabolite repression-resistant expression of lignocellulolytic enzymes in <i>P. decumbens</i> . ....                                 | 84 |
| <b>Figure S5.</b> Sequence variations in the promoter region of <i>cel7A-I</i> . ....                                                                          | 86 |
| <b>Figure S6.</b> Amino acid composition of seven major components of the secretomes of strains 114-2 and JU-A10-T. ....                                       | 87 |

**Table S1.** Statistics of genome sequencing and assembly of *P. decumbens* JU-A10-T.

|                               | <b>JU-A10-T</b> |
|-------------------------------|-----------------|
| 454 single-end reads          | 1,096,639       |
| 454 reads total length (bp)   | 393,651,182     |
| 454 reads average length (bp) | 359             |
| Solexa mate-paired reads      | 9,031,102       |
| Solexa paired-end reads       | 29,877,448      |
|                               |                 |
| Assembly size (Mb)            | 30.68           |
| Contig number                 | 482             |
| Scaffolds number              | 24              |
| Contig N50 (bp)               | 154,880         |
| Scaffold N50 (bp)             | 2,808,009       |

**Table S2.** Statistics of predicted gene models in *P. decumbens* JU-A10-T.

|                                                  | <b>JU-A10-T</b> |
|--------------------------------------------------|-----------------|
| <b>Nuclear genome</b>                            |                 |
| Size of assembled genome (Mb)                    | 30.7            |
| GC content of assembled genome (%)               | 50.5            |
| All protein-coding genes                         | 10,464          |
| Protein-coding genes ( $\geq 60$ aa)             | 10,110          |
| GC content of protein-coding region (%)          | 54.4            |
| Average gene length (bp)                         | 1,556           |
| Average number of introns per gene               | 1.92            |
| Genes with intron                                | 7,986           |
| Average intron size (bp)                         | 115             |
| Average exon size (bp)                           | 456             |
| Number of tRNA genes                             | 169             |
| <b>Mitochondrial genome</b>                      |                 |
| Size (bp)                                        | 26,536          |
| GC content (%)                                   | 26.7            |
| Protein-coding genes                             | 9               |
| Number of tRNA genes                             | 29              |
| <b>454 transcriptome sequencing data support</b> |                 |
| Coverage = 100%, Identity = 100%                 | 3,913 (37.4%)   |
| Coverage $\geq 95\%$ , Identity $\geq 95\%$      | 4,719 (45.1%)   |
| Coverage $\geq 70\%$ , Identity $\geq 90\%$      | 5,759 (47.0%)   |
| Intron-exon boundaries supported                 | 13,887 (68.9%)  |
| <b>Function annotation</b>                       |                 |
| NR (E-value $\leq 1e-5$ )                        | 8,569           |
| Swiss-Prot (E-value $\leq 1e-5$ )                | 6,318           |
| KEGG (E-value $\leq 1e-5$ , Rank = 30)           | 3,902           |
| String (E-value $\leq 1e-5$ , Rank = 5)          | 5,131           |

**Table S3.** Transcription factors with amino acid sequence variations between *P. decumbens* 114-2 and JU-A10-T.

| Protein ID                                               |           | FTFD family name                           | Amino acid position <sup>a</sup> | Mutation   | Affected domain <sup>b</sup> |
|----------------------------------------------------------|-----------|--------------------------------------------|----------------------------------|------------|------------------------------|
| 114-2                                                    | JU-A10-T  |                                            |                                  |            |                              |
| <b>Proteins with frameshift mutations</b>                |           |                                            |                                  |            |                              |
| PDE_03168                                                | PDT_03340 | C2H2 zinc finger                           | 402                              | frameshift |                              |
| PDE_08589                                                | PDT_08869 | Zn2Cys6                                    | 317                              | frameshift | Fungal_trans                 |
| <b>Proteins with nonsense mutations</b>                  |           |                                            |                                  |            |                              |
| PDE_05870                                                | PDT_06103 | Zn2Cys6                                    | 263                              | W->*       |                              |
| <b>Proteins with amino acid substitutions and indels</b> |           |                                            |                                  |            |                              |
| PDE_00052                                                | PDT_00054 | Zn2Cys6                                    | 162                              | G->V       |                              |
|                                                          |           |                                            | 870                              | K->E       |                              |
| PDE_00115                                                | PDT_00117 | Tubby transcription factors                | 98                               | T->A       | Tub_2                        |
| PDE_00222                                                | PDT_00226 | Zinc finger, CCHC-type                     | 587                              | P->S       |                              |
| PDE_00454                                                | PDT_00468 | C2H2 zinc finger;Homeobox;Homeodomain-like | 22                               | I->V       |                              |
| PDE_00496                                                | PDT_00514 | Zn2Cys6                                    | 96                               | K->R       |                              |
| PDE_00521                                                | PDT_00540 | Zn2Cys6                                    | 242                              | P->S       |                              |
| PDE_00531                                                | PDT_00551 | Zn2Cys6                                    | 242                              | P->S       |                              |
|                                                          |           |                                            | 367                              | N->D       |                              |
|                                                          |           |                                            | 504                              | S->C       |                              |
|                                                          |           |                                            | 656                              | F->I       |                              |
|                                                          |           |                                            | 769                              | S->L       |                              |
|                                                          |           |                                            | 820                              | N->D       |                              |
| PDE_00548                                                | PDT_00568 | Zn2Cys6                                    | 586                              | I->L       | Zip                          |
|                                                          |           |                                            | 694                              | Q->H       |                              |
| PDE_00588                                                | PDT_00609 | Zinc finger, NF-X1-type                    | 798                              | P->S       |                              |
| PDE_00841                                                | PDT_00875 | Winged helix repressor DNA-binding         | 315                              | N->S       | AAA_16                       |
| PDE_00844                                                | PDT_00878 | Winged helix repressor DNA-binding         | 828                              | G->E       |                              |
| PDE_00895                                                | PDT_00931 | C2H2 zinc finger                           | 89                               | A->V       |                              |
|                                                          |           |                                            | 182                              | T->A       |                              |
|                                                          |           |                                            | 436                              | T->S       |                              |
| PDE_00959                                                | PDT_00998 | Zn2Cys6                                    | 677                              | A->-       | Fungal_trans                 |
| PDE_01231                                                | PDT_01289 | Zn2Cys6                                    | 182                              | P->S       |                              |
| PDE_01258                                                | PDT_01323 | Zn2Cys6                                    | 91                               | T->S       | Zn_clus                      |
|                                                          |           |                                            | 111                              | V->A       |                              |
|                                                          |           |                                            | 121                              | P->S       |                              |
|                                                          |           |                                            | 155                              | I->L       |                              |

|           |           |                                                   |         |               |                 |
|-----------|-----------|---------------------------------------------------|---------|---------------|-----------------|
|           |           |                                                   | 323     | P->L          | Fungal_trans    |
|           |           |                                                   | 464     | C->S          |                 |
|           |           |                                                   | 477     | T->S          |                 |
|           |           |                                                   | 488     | A->T          |                 |
|           |           |                                                   | 518     | A->T          |                 |
|           |           |                                                   | 662     | L->P          |                 |
| PDE_01373 | PDT_01450 | Zn2Cys6                                           | 73      | Q->R          |                 |
| PDE_01570 | PDT_01651 | Zn2Cys6                                           | 438     | E->K          |                 |
| PDE_01749 | PDT_01833 | Zn2Cys6                                           | 686     | D->N          |                 |
|           |           |                                                   | 731     | N->S          |                 |
|           |           |                                                   | 732     | Q->K          |                 |
|           |           |                                                   | 733     | W->Q          |                 |
| PDE_01792 | PDT_01878 | Zn2Cys6                                           | 611     | P->H          |                 |
| PDE_01813 | PDT_01901 | Myb;Homeodomain-like                              | 575     | S->P          |                 |
|           |           |                                                   | 581     | N->S          |                 |
|           |           |                                                   | 642     | L->P          |                 |
| PDE_01919 | PDT_02007 | MADS-box                                          | 186     | D->N          |                 |
| PDE_01962 | PDT_02050 | Transcription factor jumonji                      | 193     | D->E          | Cupin_8         |
| PDE_02018 | PDT_02107 | C2H2 zinc finger;Zinc finger, Rad18-type putative | 369     | I->V          | FYVE            |
| PDE_02029 | PDT_02120 | GATA type zinc finger                             | 105     | N->-          |                 |
|           |           |                                                   | 343     | R->G          |                 |
| PDE_02064 | PDT_02158 | bZIP                                              | 80      | F->I          | ATG16           |
| PDE_02646 | PDT_02782 | Zn2Cys6                                           | 73      | K->Q          |                 |
|           |           |                                                   | 114     | R->H          |                 |
|           |           |                                                   | 138     | I->V          |                 |
|           |           |                                                   | 170     | T->I          |                 |
|           |           |                                                   | 189     | V->I          |                 |
|           |           |                                                   | 219     | G->E          | Fungal_trans    |
|           |           |                                                   | 329     | G->S          | Fungal_trans    |
|           |           |                                                   | 387     | N->S          | Fungal_trans    |
|           |           |                                                   | 524     | K->R          |                 |
| PDE_02772 | PDT_02918 | Zn2Cys6                                           | 615     | Q->-          | Peptidase_S49_N |
|           |           |                                                   | 627-636 | QQQQQQQQQQ->- | Peptidase_S49_N |
| PDE_02773 | PDT_02919 | Zn2Cys6                                           | 6       | G->D          |                 |
| PDE_02807 | PDT_02955 | Zn2Cys6                                           | 266     | A->T          |                 |
| PDE_02813 | PDT_02961 | C2H2 zinc finger;Zinc finger, BED-type predicted  | 319     | M->T          |                 |
| PDE_02852 | PDT_03003 | C2H2 zinc finger;Zn2Cys6                          | 296     | G->S          | Fungal_trans    |
| PDE_03008 | PDT_03177 | Myb;Homeodomain-like                              | 172     | Q->E          |                 |

|                |           |                                                                 |      |       |              |
|----------------|-----------|-----------------------------------------------------------------|------|-------|--------------|
|                |           |                                                                 | 260  | H->Y  |              |
| PDE_03129      | PDT_03300 | Zn2Cys6                                                         | 99   | +QQ   |              |
| PDE_03264      | PDT_03443 | bZIP                                                            | 396  | A->S  | PAP1         |
| PDE_03298      | PDT_03479 | Zn2Cys6                                                         | 663  | +QQQQ | Tim54        |
| PDE_03324      | PDT_03505 | C2H2 zinc finger                                                | 400  | T->I  |              |
| PDE_03334      | PDT_03519 | GATA type zinc finger                                           | 240  | T->A  |              |
| PDE_03473<br>c | PDT_03670 | Centromere protein B,<br>DNA-binding<br>region;Homeodomain-like | 424  | H->Q  |              |
|                |           |                                                                 | 425  | F->L  |              |
|                |           |                                                                 | 682  | K->R  |              |
| PDE_03610      | PDT_03815 | Zn2Cys6                                                         | 159  | +N    |              |
| PDE_03741      | PDT_03954 | Zn2Cys6                                                         | 50   | V->A  |              |
|                |           |                                                                 | 61   | V->A  |              |
|                |           |                                                                 | 77   | G->D  |              |
|                |           |                                                                 | 78   | A->T  |              |
|                |           |                                                                 | 315  | S->L  | Fungal_trans |
|                |           |                                                                 | 387  | Q->K  | Fungal_trans |
|                |           |                                                                 | 412  | L->M  | Fungal_trans |
|                |           |                                                                 | 443  | E->D  |              |
| PDE_03754      | PDT_03968 | p53-like transcription<br>factor                                | 133  | E->K  | NDT80_PhoG   |
| PDE_03970      | PDT_04199 | Homeobox;Homeodomain-<br>like                                   | 107  | T->A  |              |
| PDE_04009      | PDT_04212 | Zn2Cys6                                                         | 240  | F->L  |              |
| PDE_04056      | PDT_04259 | ssDNA-binding<br>transcriptional regulator                      | 32   | T->K  | PC4          |
| PDE_04481      | PDT_04680 | Zn2Cys6                                                         | 260  | N->D  |              |
| PDE_04501      | PDT_04701 | bZIP                                                            | 193  | S->N  |              |
| PDE_04690      | PDT_04908 | Forkhead;Winged helix<br>repressor DNA-binding                  | 550  | K->E  |              |
|                |           |                                                                 | 893  | H->N  |              |
|                |           |                                                                 | 1002 | P->S  |              |
|                |           |                                                                 | 1028 | S->P  |              |
|                |           |                                                                 | 1108 | M->I  |              |
|                |           |                                                                 | 1156 | +Q    |              |
| PDE_04716      | PDT_04939 | CCR4-Not complex<br>component, Not1                             | 20   | K->R  |              |
|                |           |                                                                 | 2184 | T->A  | Not1         |
| PDE_04733      | PDT_04958 | Zn2Cys6                                                         | 161  | S->P  |              |
|                |           |                                                                 | 166  | R->G  |              |
|                |           |                                                                 | 417  | G->R  |              |
| PDE_04760      | PDT_04986 | Winged helix repressor                                          | 15   | A->T  |              |

|           |           |                            |         |        |              |
|-----------|-----------|----------------------------|---------|--------|--------------|
|           |           | DNA-binding                |         |        |              |
| PDE_04763 | PDT_04989 | AT-rich interaction region | 22      | T->A   |              |
|           |           |                            | 61      | P->S   |              |
|           |           |                            | 231     | H->Q   |              |
|           |           |                            | 298-299 | QQ->-  |              |
|           |           |                            | 419-420 | HH->QQ |              |
|           |           |                            | 425     | +QQQQP |              |
|           |           |                            | 444     | +HQQQQ |              |
|           |           |                            | 475     | S->P   |              |
|           |           |                            | 514     | P->L   |              |
| PDE_04782 | PDT_05008 | C2H2 zinc finger;Zn2Cys6   | 72      | V->I   | Zn_clus      |
|           |           |                            | 145     | Q->R   |              |
|           |           |                            | 150     | D->N   |              |
|           |           |                            | 193     | T->A   |              |
|           |           |                            | 229     | N->S   |              |
|           |           |                            | 234     | F->L   |              |
|           |           |                            | 243     | V->A   |              |
|           |           |                            | 306     | T->I   |              |
|           |           |                            | 460     | N->D   |              |
|           |           |                            | 525     | T->A   |              |
| PDE_04896 | PDT_05126 | C2H2 zinc finger           | 691     | G->V   |              |
| PDE_04903 | PDT_05133 | bZIP                       | 9       | I->N   |              |
| PDE_04931 | PDT_05162 | Homeobox;Homeodomain-like  | 544     | I->K   |              |
| PDE_04957 | PDT_05188 | SGT1                       | 318     | S->G   | SGT1         |
| PDE_05021 | PDT_05252 | Zn2Cys6                    | 364     | L->P   | Fungal_trans |
| PDE_05030 | PDT_05261 | Zinc finger, CCHC-type     | 548     | P->S   |              |
| PDE_05166 | PDT_05398 | Zn2Cys6                    | 798     | E->D   |              |
| PDE_05378 | PDT_05615 | Zn2Cys6                    | 35      | +QQ    |              |
|           |           |                            | 743     | T->A   |              |
| PDE_05545 | PDT_05779 | bZIP                       | 452     | S->P   |              |
| PDE_05681 | PDT_05916 | Zn2Cys6                    | 198     | V->M   | Fungal_trans |
| PDE_05810 | PDT_06044 | Zinc finger, CCHC-type     | 82      | +AAEI  |              |
| PDE_05919 | PDT_06150 | Zn2Cys6                    | 30      | S->F   |              |
| PDE_05963 | PDT_06195 | Zn2Cys6                    | 70      | L->S   | Zn_clus      |
|           |           |                            | 260     | F->L   | Fungal_trans |
|           |           |                            | 266     | I->T   | Fungal_trans |
|           |           |                            | 448     | S->T   | Fungal_trans |
|           |           |                            | 511     | S->P   |              |
|           |           |                            | 795     | L->P   |              |
| PDE_06057 | PDT_06284 | Zn2Cys6                    | 142     | E->G   |              |
| PDE_06088 | PDT_06317 | Zn2Cys6                    | 420     | R->C   | Fungal_trans |
| PDE_06158 | PDT_06390 | Transcription factor       | 624     | V->I   | Cupin_8      |



|           |           |                                       |         |                                         |               |
|-----------|-----------|---------------------------------------|---------|-----------------------------------------|---------------|
|           |           | jumonji                               |         |                                         |               |
| PDE_06213 | PDT_06446 | Zn2Cys6                               | 434     | M->T                                    |               |
| PDE_06331 | PDT_06561 | Winged helix repressor<br>DNA-binding | 490     | Q->H                                    |               |
| PDE_06342 | PDT_06572 | Zn2Cys6                               | 46      | V->I                                    | Zn_clus       |
| PDE_06349 | PDT_06579 | Zinc finger, NF-X1-type               | 39      | R->G                                    |               |
|           |           |                                       | 315     | T->I                                    |               |
|           |           |                                       | 1213    | Q->R                                    |               |
| PDE_06383 | PDT_06614 | Heteromeric CCAAT<br>factors          | 231     | E->K                                    | Hus1          |
| PDE_06407 | PDT_06640 | Zinc finger, DHHC-type                | 299     | V->A                                    |               |
|           |           |                                       | 367     | +Q                                      |               |
| PDE_06594 | PDT_06830 | Zinc finger, CCHC-type                | 61-88   | VNAPWRNMDNP<br>NGTAPNGWTTM<br>YNNIIK->- |               |
|           |           |                                       | 98      | A->P                                    |               |
|           |           |                                       | 107     | N->D                                    |               |
|           |           |                                       | 123     | Q->K                                    |               |
|           |           |                                       | 124-132 | SQFQSKPYG->-                            |               |
|           |           |                                       | 141     | V->A                                    |               |
|           |           |                                       | 151     | G->E                                    |               |
|           |           |                                       | 153     | Q->E                                    |               |
|           |           |                                       | 158     | Y->-                                    |               |
|           |           |                                       | 161     | T->A                                    |               |
|           |           |                                       | 169     | S->D                                    |               |
|           |           |                                       | 172     | D->E                                    |               |
|           |           |                                       | 174     | Y->H                                    |               |
|           |           |                                       | 192     | G->E                                    |               |
|           |           |                                       | 195     | Q->H                                    |               |
|           |           |                                       | 202     | V->F                                    |               |
|           |           |                                       | 215     | R->G                                    |               |
|           |           |                                       | 219     | D->N                                    |               |
|           |           |                                       | 220     | A->T                                    |               |
|           |           |                                       | 223     | A->P                                    |               |
|           |           |                                       | 225     | K->T                                    |               |
|           |           |                                       | 226-227 | GH->-                                   |               |
|           |           |                                       | 230     | D->E                                    |               |
|           |           |                                       | 231     | P->T                                    |               |
|           |           |                                       | 237     | S->P                                    |               |
|           |           |                                       | 240     | D->N                                    |               |
|           |           |                                       | 246     | H->Y                                    |               |
|           |           |                                       | 257     | A->T                                    |               |
| PDE_06660 | PDT_06904 | Zn2Cys6                               | 607     | Y->H                                    | Fungal_trans_ |

|           |           |                                       |         |             |                |
|-----------|-----------|---------------------------------------|---------|-------------|----------------|
|           |           |                                       |         |             | 2              |
| PDE_06698 | PDT_06942 | HMG                                   | 117     | T->M        |                |
|           |           |                                       | 421     | R->Q        |                |
|           |           |                                       | 425     | D->N        |                |
|           |           |                                       | 614     | T->I        |                |
| PDE_06695 | PDT_06939 | C2H2 zinc finger                      | 55      | L->M        |                |
| PDE_06696 | PDT_06940 | C2H2 zinc finger                      | 21      | H->L        | zf-C2H2_jaz    |
|           |           |                                       | 143     | P->S        | zf-C2H2        |
| PDE_06747 | PDT_06992 | C2H2 zinc finger                      | 20      | V->I        |                |
|           |           |                                       | 51      | L->S        |                |
|           |           |                                       | 137     | L->W        |                |
|           |           |                                       | 424     | T->A        |                |
| PDE_06784 | PDT_07029 | Zn2Cys6                               | 83      | N->S        |                |
| PDE_06843 | PDT_07090 | Zn2Cys6                               | 39      | V->A        |                |
|           |           |                                       | 172-173 | QQ->-       | Mitofilin      |
|           |           |                                       | 190     | H->L        | Mitofilin      |
|           |           |                                       | 422     | S->N        |                |
| PDE_06846 | PDT_07093 | Zn2Cys6                               | 124     | T->I        | Fungal_trans   |
| PDE_06878 | PDT_07123 | Zn2Cys6                               | 285     | S->-        | Fungal_trans   |
| PDE_06888 | PDT_07134 | Zn2Cys6                               | 543     | Q->L        |                |
| PDE_06913 | PDT_07161 | Zn2Cys6                               | 254     | G->D        | Fungal_trans   |
| PDE_06927 | PDT_07177 | Myb;Homeodomain-like                  | 511     | A->T        | Myb_Cef        |
|           |           |                                       | 664     | D->G        | Myb_Cef        |
| PDE_06945 | PDT_07195 | Winged helix repressor<br>DNA-binding | 934     | S->P        |                |
| PDE_06963 | PDT_07215 | Winged helix repressor<br>DNA-binding | 766     | P->S        | Cullin         |
|           |           |                                       | 861-868 | AAAAAAAE->- |                |
|           |           |                                       | 875     | A->V        |                |
| PDE_07029 | PDT_07284 | Zn2Cys6                               | 323     | G->D        | Fungal_trans_2 |
|           |           |                                       | 357     | S->T        | Fungal_trans_2 |
|           |           |                                       | 430     | P->L        |                |
| PDE_07094 | PDT_07349 | C2H2 zinc finger                      | 256     | E->K        |                |
| PDE_07172 | PDT_07427 | Zn2Cys6                               | 39      | S->R        | Zn_clus        |
| PDE_07215 | PDT_07471 | Zn2Cys6                               | 87      | +AQ         |                |
|           |           |                                       | 308     | V->F        | Fungal_trans_2 |
| PDE_07240 | PDT_07496 | Zn2Cys6                               | 323     | Y->D        | Fungal_trans   |
|           |           |                                       | 415     | A->V        | Fungal_trans   |
|           |           |                                       | 587     | R->K        |                |
|           |           |                                       | 684     | P->Q        |                |

|           |           |                                       |      |      |                    |
|-----------|-----------|---------------------------------------|------|------|--------------------|
| PDE_07250 | PDT_07507 | Zn2Cys6                               | 5    | I->T |                    |
|           |           |                                       | 12   | G->S |                    |
|           |           |                                       | 279  | L->P | Fungal_trans_2     |
|           |           |                                       | 473  | S->L |                    |
|           |           |                                       | 477  | H->R |                    |
| PDE_07338 | PDT_07597 | Zn2Cys6                               | 29   | T->A |                    |
|           |           |                                       | 63   | K->E | Zn_clus            |
| PDE_07343 | PDT_07602 | Zn2Cys6                               | 112  | A->T |                    |
| PDE_07392 | PDT_07653 | bZIP                                  | 1028 | S->N |                    |
| PDE_07489 | PDT_07751 | C2H2 zinc finger;Zn2Cys6              | 10   | G->D |                    |
| PDE_07546 | PDT_07808 | Myb;Homeodomain-like                  | 99   | T->P |                    |
|           |           |                                       | 482  | +Q   |                    |
| PDE_07554 | PDT_07816 | APSES                                 | 328  | V->A |                    |
| PDE_07588 | PDT_07851 | GATA type zinc finger                 | 82   | A->T |                    |
| PDE_07596 | PDT_07859 | Zn2Cys6                               | 110  | H->R |                    |
|           |           |                                       | 604  | G->V | Fungal_trans_2     |
|           |           |                                       | 620  | H->L |                    |
|           |           |                                       | 674  | F->L |                    |
| PDE_07712 | PDT_07980 | Zn2Cys6                               | 205  | A->T |                    |
|           |           |                                       | 217  | S->P |                    |
|           |           |                                       | 386  | P->S |                    |
|           |           |                                       | 410  | R->Q |                    |
| PDE_07750 | PDT_08018 | Zn2Cys6                               | 503  | Q->H |                    |
| PDE_07779 | PDT_08048 | Winged helix repressor<br>DNA-binding | 101  | A->V |                    |
|           |           |                                       | 211  | P->S | B-block_TFIII<br>C |
|           |           |                                       | 731  | G->D |                    |
|           |           |                                       | 804  | T->I |                    |
|           |           |                                       | 1847 | S->L |                    |
| PDE_07781 | PDT_08050 | Zinc finger, DHHC-type                | 50   | A->V |                    |
| PDE_07788 | PDT_08057 | Lambda repressor-like,<br>DNA-binding | 80   | S->G |                    |
| PDE_07942 | PDT_08210 | Zn2Cys6                               | 120  | S->P |                    |
| PDE_08048 | PDT_08312 | Zn2Cys6                               | 59   | Q->L |                    |
|           |           |                                       | 623  | C->Y |                    |
| PDE_08084 | PDT_08349 | Zn2Cys6                               | 129  | A->T |                    |
|           |           |                                       | 404  | A->P | Fungal_trans_2     |
|           |           |                                       | 469  | H->Q | Fungal_trans_2     |

|                                   |           |                                                         |         |        |                |
|-----------------------------------|-----------|---------------------------------------------------------|---------|--------|----------------|
| PDE_08088                         | PDT_08353 | APSES                                                   | 189     | P->S   |                |
|                                   |           |                                                         | 190     | T->A   |                |
|                                   |           |                                                         | 237     | D->N   |                |
| PDE_08282                         | PDT_08550 | C2H2 zinc finger                                        | 217     | N->D   |                |
| PDE_08325                         | PDT_08594 | Zinc finger, CCHC-type                                  | 504     | S->P   |                |
| PDE_08568                         | PDT_08848 | Zn2Cys6                                                 | 274     | V->L   | Fungal_trans   |
| PDE_08867                         | PDT_09158 | Zn2Cys6                                                 | 398     | S->P   |                |
| PDE_08881                         | PDT_09174 | Zinc finger, MIZ-type                                   | 106     | N->H   |                |
|                                   |           |                                                         | 162     | E->D   |                |
|                                   |           |                                                         | 298     | S->F   |                |
|                                   |           |                                                         | 479-481 | EDE->- |                |
| PDE_08894                         | PDT_09187 | Zinc finger, DHHC-type                                  | 1338    | A->S   |                |
| PDE_08983                         | PDT_09276 | Zn2Cys6                                                 | 617     | T->A   |                |
| PDE_09026                         | PDT_09320 | Zn2Cys6                                                 | 723     | N->T   |                |
| PDE_09032                         | PDT_09326 | C2H2 zinc finger                                        | 4       | T->A   |                |
| PDE_09037                         | PDT_09331 | Zn2Cys6                                                 | 370     | G->T   | Fungal_trans_2 |
| PDE_09076                         | PDT_09375 | Transcription factor jumonji                            | 198     | A->V   |                |
| PDE_09179                         | PDT_09479 | Zn2Cys6                                                 | 224     | S->L   |                |
| PDE_09227                         | PDT_09528 | Zn2Cys6                                                 | 208     | V->I   | Fungal_trans   |
|                                   |           |                                                         | 451     | H->D   |                |
| PDE_09243                         | PDT_09544 | Zn2Cys6                                                 | 142     | D->N   | AflR           |
| PDE_09254                         | PDT_09557 | Myb;Winged helix repressor DNA-binding;Homeodomain-like | 24      | A->V   |                |
|                                   |           |                                                         | 265     | A->T   |                |
|                                   |           |                                                         | 273     | T->A   |                |
| PDE_09356                         | PDT_09666 | C2H2 zinc finger                                        | 132     | P->L   |                |
| PDE_09385 +PDE_09386 <sup>d</sup> | PDT_09695 | C2H2 zinc finger                                        | 243     | G->A   |                |
|                                   |           |                                                         | 408     | A->T   | Fungal_trans   |
|                                   |           |                                                         | 421     | C->S   | Fungal_trans   |
|                                   |           |                                                         | 592     | T->N   | Fungal_trans   |
|                                   |           |                                                         | 788     | V->A   |                |
| PDE_09423                         | PDT_09734 | C2H2 zinc finger;Zn2Cys6                                | 122     | D->-   |                |
|                                   |           |                                                         | 251     | D->E   | Fungal_trans   |
|                                   |           |                                                         | 264     | D->R   | Fungal_trans   |
|                                   |           |                                                         | 360     | P->A   |                |
|                                   |           |                                                         | 365     | S->P   |                |
| PDE_09437                         | PDT_09749 | Zn2Cys6                                                 | 151     | T->S   |                |

|                        |           |                                                               |      |      |              |
|------------------------|-----------|---------------------------------------------------------------|------|------|--------------|
| PDE_09498              | PDT_09809 | Transcription factor<br>jumonji;AT-rich interaction<br>region | 595  | V->I |              |
| PDE_09536              | PDT_09848 | Zn2Cys6                                                       | 11   | Q->R |              |
|                        |           |                                                               | 200  | Y->N |              |
|                        |           |                                                               | 517  | Y->D |              |
| PDE_09868              | PDT_10182 | Zn2Cys6                                                       | 147  | G->D |              |
|                        |           |                                                               | 152  | S->G |              |
| PDE_09961              | PDT_10277 | Winged helix repressor<br>DNA-binding                         | 286  | V->A |              |
| PDE_09981 <sup>e</sup> | PDT_10296 | Myb;Homeodomain-like                                          | 324  | +RD  |              |
|                        |           |                                                               | 1591 | A->P |              |
|                        |           |                                                               | 1949 | I->M |              |
| PDE_09985              | PDT_10300 | Zn2Cys6                                                       | 285  | V->L | Fungal_trans |

<sup>a</sup> Amino acid positions refer to those in 114-2 proteins unless specially remarked.

<sup>b</sup> Affected domains are identified according to the envelope domain boundaries in Pfam prediction result.

<sup>c</sup> Amino acid position refers to that in JU-A10-T protein PDT\_03670, and the mutation event means sequence change from JU-A10-T to 114-2.

<sup>d</sup> Amino acid position refers to that in JU-A10-T protein PDT\_09695, and the mutation event means sequence change from JU-A10-T to 114-2.

<sup>e</sup> Amino acid position refers to that in JU-A10-T protein PDT\_10296, and the mutation event means sequence change from JU-A10-T to 114-2.

**Table S4.** Genes in strain-specific genomic regions of *P. decumbens* 114-2 and JU-A10-T.

| Gene ID               | Scaffold location | From..to         | Protein length | Function prediction                            | Transcription level in CW medium (tags per million) |          |
|-----------------------|-------------------|------------------|----------------|------------------------------------------------|-----------------------------------------------------|----------|
|                       |                   |                  |                |                                                | 114-2                                               | JU-A10-T |
| <b>114-2 specific</b> |                   |                  |                |                                                |                                                     |          |
| PDE_00379             | 1                 | 1028791..1030603 | 120            | hypothetical protein                           | 0                                                   | -        |
| PDE_01250             | 2                 | 6062..6787       | 223            | hypothetical protein                           | 9.86                                                | -        |
| PDE_01469             | 2                 | 632794..633715   | 38             | hypothetical protein                           | 0                                                   | -        |
| PDE_01473             | 2                 | 684114..685242   | 107            | hypothetical protein                           | 0                                                   | -        |
| PDE_01474             | 2                 | 701962..703633   | 123            | hypothetical protein                           | 0                                                   | -        |
| PDE_01475             | 2                 | 709179..709559   | 126            | transposase                                    | 0                                                   | -        |
| PDE_01476             | 2                 | 709811..710410   | 26             | hypothetical protein                           | 0                                                   | -        |
| PDE_01477             | 2                 | 732767..733337   | 33             | hypothetical protein                           | 1.02                                                | -        |
| PDE_01613             | 2                 | 1136846..1137994 | 349            | mating type protein MAT1-2-1                   | 9.18                                                | -        |
| PDE_03980             | 4                 | 2045687..2046594 | 196            | hypothetical protein                           | 0                                                   | -        |
| PDE_03981             | 4                 | 2046988..2048976 | 605            | hypothetical protein                           | 23.12                                               | -        |
| PDE_03982             | 4                 | 2050786..2054302 | 1047           | hypothetical protein                           | 289                                                 | -        |
| PDE_03983             | 4                 | 2055554..2056159 | 201            | hypothetical protein                           | 0                                                   | -        |
| PDE_03984             | 4                 | 2057850..2061982 | 1344           | NACHT and ankyrin domain protein               | 17.68                                               | -        |
| PDE_03985             | 4                 | 2063106..2068201 | 1528           | reverse transcriptase                          | 30.6                                                | -        |
| PDE_03986             | 4                 | 2068781..2072210 | 1044           | ankyrin domain repeat protein                  | 148.92                                              | -        |
| PDE_03987             | 4                 | 2073680..2075914 | 596            | NACHT domain protein                           | 43.86                                               | -        |
| PDE_03988             | 4                 | 2076407..2077357 | 316            | hypothetical protein                           | 0                                                   | -        |
| PDE_03989             | 4                 | 2078104..2079600 | 498            | phosphotransferase enzyme family protein       | 52.36                                               | -        |
| PDE_03990             | 4                 | 2080676..2080927 | 83             | hypothetical protein                           | 3512.54                                             | -        |
| PDE_03991             | 4                 | 2083135..2083432 | 83             | hypothetical protein                           | 792.2                                               | -        |
| PDE_03992             | 4                 | 2083462..2084600 | 362            | hypothetical protein                           | 9.52                                                | -        |
| PDE_03993             | 4                 | 2085117..2086488 | 441            | mitochondrial chaperone BCS1                   | 7.48                                                | -        |
| PDE_03994             | 4                 | 2087883..2090159 | 758            | hypothetical protein                           | 93.16                                               | -        |
| PDE_03995             | 4                 | 2090842..2091289 | 91             | hypothetical protein                           | 0                                                   | -        |
| PDE_03996             | 4                 | 2093180..2093923 | 176            | hypothetical protein                           | 1.7                                                 | -        |
| PDE_03997             | 4                 | 2095163..2096141 | 233            | hypothetical protein                           | 2.72                                                | -        |
| PDE_03998             | 4                 | 2097444..2099152 | 513            | hypothetical protein                           | 265.54                                              | -        |
| PDE_03999             | 4                 | 2101489..2102364 | 291            | zinc-finger double-stranded RNA-binding domain | 14.96                                               | -        |

|           |   |                  |      |                                                 |        |   |
|-----------|---|------------------|------|-------------------------------------------------|--------|---|
|           |   |                  |      | protein                                         |        |   |
| PDE_04000 | 4 | 2104010..2107179 | 921  | NACHT domain protein                            | 100.3  | - |
| PDE_04001 | 4 | 2107889..2108644 | 214  | hypothetical protein                            | 1.7    | - |
| PDE_04002 | 4 | 2110201..2111098 | 105  | hypothetical protein                            | 0      | - |
| PDE_04003 | 4 | 2111365..2114252 | 826  | Serine/threonine-protein kinase                 | 96.9   | - |
| PDE_04004 | 4 | 2116512..2119351 | 826  | NACHT and WD domain protein                     | 8.16   | - |
| PDE_04005 | 4 | 2120517..2123023 | 781  | hypothetical protein                            | 62.56  | - |
| PDE_04443 | 5 | 225..1684        | 450  | hypothetical protein                            | 1.7    | - |
| PDE_04444 | 5 | 2485..3960       | 491  | F-box domain protein                            | 11.22  | - |
| PDE_04445 | 5 | 6313..7551       | 412  | hypothetical protein                            | 0.68   | - |
| PDE_04446 | 5 | 10344..10886     | 180  | hypothetical protein                            | 0      | - |
| PDE_05450 | 5 | 2946199..2950094 | 1182 | NACHT and ankyrin domain protein                | 135.66 | - |
| PDE_05451 | 5 | 2951382..2953918 | 809  | SAM and PH domain protein                       | 45.22  | - |
| PDE_05452 | 5 | 2954326..2955044 | 134  | hypothetical protein                            | 16.32  | - |
| PDE_05453 | 5 | 2958976..2961145 | 682  | C6 sexual development transcription factor NosA | 112.88 | - |
| PDE_05454 | 5 | 2963268..2963939 | 223  | hypothetical protein                            | 95.2   | - |
| PDE_05455 | 5 | 2969385..2970576 | 377  | hypothetical protein                            | 41.14  | - |
| PDE_06039 | 6 | 21223..22133     | 220  | AAA family ATPase                               | 0.68   | - |
| PDE_06040 | 6 | 27590..28862     | 320  | ankyrin domain repeat protein                   | 0      | - |
| PDE_06041 | 6 | 30097..30344     | 72   | hypothetical protein                            | 0      | - |
| PDE_06244 | 6 | 672590..682299   | 7    | hypothetical protein                            | 0      | - |
| PDE_06245 | 6 | 699794..700372   | 192  | hypothetical protein                            | 0      | - |
| PDE_06246 | 6 | 705668..707086   | 472  | kinesin light chain                             | 15.64  | - |
| PDE_06247 | 6 | 707304..708446   | 380  | hypothetical protein                            | 45.9   | - |
| PDE_06248 | 6 | 708726..709763   | 324  | hypothetical protein                            | 152.66 | - |
| PDE_06249 | 6 | 713046..714543   | 151  | hypothetical protein                            | 0      | - |
| PDE_06250 | 6 | 714885..715259   | 124  | hypothetical protein                            | 0      | - |
| PDE_06251 | 6 | 724162..725538   | 282  | retrotransposon protein                         | 0      | - |
| PDE_06252 | 6 | 726346..729399   | 1017 | retrotransposon protein                         | 0      | - |
| PDE_08027 | 7 | 4206361..4207261 | 253  | trichodiene synthase                            | 2.04   | - |
| PDE_08028 | 7 | 4209008..4209125 | 26   | hypothetical protein                            | 0      | - |
| PDE_08029 | 7 | 4213254..4213919 | 162  | conidiation-specific protein 6                  | 6.12   | - |
| PDE_08030 | 8 | 1116..1774       | 118  | hypothetical protein                            | 8.16   | - |
| PDE_08031 | 8 | 2504..3342       | 188  | hypothetical protein                            | 0      | - |
| PDE_08032 | 8 | 10605..13316     | 903  | nonribosomal peptide                            | 78.2   | - |

|                          |   |                  |      |                                                          |        |         |
|--------------------------|---|------------------|------|----------------------------------------------------------|--------|---------|
|                          |   |                  |      | synthetase                                               |        |         |
| PDE_08033                | 8 | 14584..15525     | 280  | oxidoreductase                                           | 120.02 | -       |
| PDE_08034                | 8 | 16805..18294     | 419  | GDSL-like<br>lipase/acylhydrolase                        | 0      | -       |
| PDE_08035                | 8 | 18859..20614     | 530  | lactose permease                                         | 42.16  | -       |
| PDE_08036                | 8 | 22922..24539     | 514  | $\beta$ -xylosidase/ $\alpha$ -L-arabin<br>ofuranosidase | 61.54  | -       |
| PDE_08037                | 8 | 25355..28220     | 900  | $\beta$ -xylosidase                                      | 1.36   | -       |
| PDE_08038                | 8 | 29770..31109     | 409  | exo- $\alpha$ -L-1,5-arabinanas<br>e                     | 8.5    | -       |
| PDE_08039                | 8 | 31746..32465     | 239  | acetyltransferase                                        | 10.2   | -       |
| PDE_08040                | 8 | 33214..35085     | 571  | phosphate transporter                                    | 1.02   | -       |
| PDE_08041                | 8 | 38615..39708     | 229  | sugar transporter                                        | 0      | -       |
| PDE_09097                | 8 | 3228527..3229577 | 283  | hypothetical protein                                     | 0      | -       |
| PDE_09250                | 8 | 3741965..3743764 | 599  | hypothetical protein                                     | 171.36 | -       |
| PDE_09251                | 8 | 3745033..3746309 | 337  | UDP-GlcNAc:<br>N-acetylglucosaminyltr<br>ansferase       | 357.68 | -       |
| PDE_09252                | 8 | 3747715..3748054 | 56   | hypothetical protein                                     | 0      | -       |
|                          |   |                  |      |                                                          |        |         |
| <b>JU-A10-T specific</b> |   |                  |      |                                                          |        |         |
| PDT_00001                | 1 | 2554..6099       | 1181 | hypothetical protein                                     | -      | 0.55    |
| PDT_00387                | 2 | 561..11989       | 459  | Myb-like DNA-binding<br>domain protein                   | -      | 11.83   |
| PDT_01164                | 3 | 17582..18259     | 225  | hypothetical protein                                     | -      | 1035.34 |
| PDT_01165                | 3 | 18299..23567     | 1738 | retrotransposon protein                                  | -      | 63.81   |
| PDT_01307                | 5 | 1972..3888       | 574  | cytochrome P450                                          | -      | 26.68   |
| PDT_01308                | 5 | 4095..6019       | 558  | MFS-type transporter                                     | -      | 5.5     |
| PDT_01309                | 5 | 7217..8104       | 295  | dehydrogenase/reductas<br>e                              | -      | 1.1     |
| PDT_01310                | 5 | 8301..9400       | 290  | hypothetical protein                                     | -      | 4.4     |
| PDT_01311                | 5 | 10783..10986     | 67   | hypothetical protein                                     | -      | 17.88   |
| PDT_01312                | 5 | 13527..13805     | 92   | hypothetical protein                                     | -      | 0       |
| PDT_01313                | 5 | 19053..19214     | 53   | hypothetical protein                                     | -      | 0       |
| PDT_01548                | 5 | 660470..661472   | 312  | hypothetical protein                                     | -      | 12.38   |
| PDT_01549                | 5 | 663017..664096   | 338  | alcohol dehydrogenase                                    | -      | 0       |
| PDT_01550                | 5 | 665171..666339   | 345  | aldo-keto reductase                                      | -      | 0       |
| PDT_01551                | 5 | 667398..668552   | 384  | aryl-alcohol<br>dehydrogenase                            | -      | 0       |
| PDT_01552                | 5 | 669359..670474   | 371  | aldo-keto reductase                                      | -      | 0       |
| PDT_01553                | 5 | 733415..734580   | 229  | hypothetical protein                                     | -      | 0       |
| PDT_01696                | 5 | 1178667..1179638 | 305  | mating type protein<br>MAT1-1-1                          | -      | 0       |



|           |    |                  |       |                                                 |   |         |
|-----------|----|------------------|-------|-------------------------------------------------|---|---------|
| PDT_04089 | 7  | 1686022..1704576 | 24    | hypothetical protein                            | - | 0       |
| PDT_04090 | 7  | 1712815..1716562 | 1172  | NACHT domain protein                            | - | 60.51   |
| PDT_04091 | 7  | 1725011..1741734 | 32    | hypothetical protein                            | - | 0       |
| PDT_05687 | 10 | 1779556..1783377 | 1175  | NACHT and Ankyrin domain protein                | - | 91.87   |
| PDT_05688 | 10 | 1784659..1787221 | 808   | SAM and PH domain protein                       | - | 56.94   |
| PDT_05689 | 10 | 1790595..1792772 | 671   | C6 sexual development transcription factor NosA | - | 689.31  |
| PDT_05690 | 10 | 1795282..1795908 | 208   | hypothetical protein                            | - | 1000.68 |
| PDT_05691 | 10 | 1802057..1803261 | 382   | hypothetical protein                            | - | 410.39  |
| PDT_06477 | 12 | 3032..3550       | 172   | hypothetical protein                            | - | 0       |
| PDT_06478 | 12 | 4482..18995      | 30    | hypothetical protein                            | - | 0       |
| PDT_06479 | 12 | 22169..22751     | 96    | hypothetical protein                            | - | 0       |
| PDT_06848 | 12 | 1065024..1065239 | 71    | hypothetical protein                            | - | 2.75    |
| PDT_06849 | 12 | 1065342..1065698 | 118   | hypothetical protein                            | - | 11.55   |
| PDT_06850 | 12 | 1065791..1065937 | 48    | hypothetical protein                            | - | 0       |
| PDT_08296 | 16 | 2647825..2657309 | 97    | hypothetical protein                            | - | 0       |
| PDT_08297 | 16 | 2666090..2717900 | 15581 | nonribosomal peptide synthase                   | - | 1.93    |
| PDT_08298 | 16 | 2719393..2720792 | 388   | acetyl-CoA acetyltransferase                    | - | 0.83    |
| PDT_08299 | 16 | 2721475..2726739 | 1499  | ABC multidrug transporter                       | - | 34.66   |
| PDT_08300 | 16 | 2727394..2728434 | 321   | hypothetical protein                            | - | 59.41   |
| PDT_08301 | 16 | 2728861..2729490 | 145   | hypothetical protein                            | - | 237.38  |
| PDT_08302 | 16 | 2730552..2731990 | 280   | polyketide synthase                             | - | 43.46   |
| PDT_08303 | 16 | 2738361..2804589 | 21879 | nonribosomal peptide synthase                   | - | 40.98   |
| PDT_08304 | 16 | 2805031..2805615 | 194   | hypothetical protein                            | - | 421.4   |
| PDT_08305 | 16 | 2806711..2806902 | 63    | hypothetical protein                            | - | 0       |
| PDT_09551 | 17 | 3689780..3690472 | 230   | hypothetical protein                            | - | 2.2     |
| PDT_09552 | 17 | 3692008..3692931 | 307   | NmrA-like family domain-containing protein      | - | 3.3     |
| PDT_09553 | 17 | 3695558..3696608 | 306   | alpha 1,2-galactosyltransferase                 | - | 154.86  |
| PDT_09554 | 17 | 3697918..3699041 | 333   | glycophorin A domain protein                    | - | 356.76  |
| PDT_09555 | 17 | 3700812..3701781 | 279   | hypothetical protein                            | - | 8.25    |
| PDT_09732 | 17 | 4205626..4206945 | 259   | transferase family                              | - | 0       |

|           |    |              |      |                                            |   |       |
|-----------|----|--------------|------|--------------------------------------------|---|-------|
|           |    |              |      | protein                                    |   |       |
| PDT_10330 | 18 | 2224..2469   | 43   | hypothetical protein                       | - | 1.65  |
| PDT_10331 | 18 | 3811..4107   | 79   | hypothetical protein                       | - | 0     |
| PDT_10332 | 18 | 5484..6268   | 240  | hypothetical protein                       | - | 0     |
| PDT_10333 | 18 | 6625..8301   | 316  | hypothetical protein                       | - | 0     |
| PDT_10334 | 18 | 8709..9393   | 111  | hypothetical protein                       | - | 0     |
| PDT_10335 | 18 | 10429..11142 | 131  | hypothetical protein                       | - | 0     |
| PDT_10336 | 18 | 11724..11902 | 36   | hypothetical protein                       | - | 0     |
| PDT_10337 | 18 | 13383..14385 | 303  | hypothetical protein                       | - | 0     |
| PDT_10339 | 18 | 17926..18312 | 128  | hypothetical protein                       | - | 1.38  |
| PDT_10340 | 18 | 19525..19707 | 60   | hypothetical protein                       | - | 0     |
| PDT_10341 | 18 | 24902..25490 | 45   | hypothetical protein                       | - | 0     |
| PDT_10342 | 18 | 28658..38741 | 53   | hypothetical protein                       | - | 0     |
| PDT_10343 | 18 | 48619..48855 | 59   | chitinase                                  | - | 0     |
| PDT_10344 | 18 | 59245..59798 | 54   | hypothetical protein                       | - | 0     |
| PDT_10345 | 19 | 104..801     | 194  | hypothetical protein                       | - | 0     |
| PDT_10346 | 19 | 4290..4705   | 106  | hypothetical protein                       | - | 12.65 |
| PDT_10347 | 19 | 6226..6834   | 202  | hypothetical protein                       | - | 12.38 |
| PDT_10348 | 19 | 7161..8336   | 298  | hypothetical protein                       | - | 18.98 |
| PDT_10349 | 19 | 9709..11284  | 428  | chitinase                                  | - | 2.75  |
| PDT_10351 | 19 | 13712..14119 | 135  | hypothetical protein                       | - | 0     |
| PDT_10352 | 19 | 17871..20685 | 706  | translation elongation factor EF-2 subunit | - | 0.83  |
| PDT_10353 | 19 | 24943..25272 | 61   | hypothetical protein                       | - | 0     |
| PDT_10354 | 19 | 46841..47534 | 146  | hypothetical protein                       | - | 0     |
| PDT_10355 | 19 | 53604..54506 | 220  | hypothetical protein                       | - | 0     |
| PDT_10356 | 19 | 59826..60166 | 40   | hypothetical protein                       | - | 0     |
| PDT_10358 | 20 | 1983..2767   | 240  | hypothetical protein                       | - | 0     |
| PDT_10359 | 20 | 4044..4340   | 79   | hypothetical protein                       | - | 0     |
| PDT_10361 | 20 | 8357..9196   | 66   | hypothetical protein                       | - | 0     |
| PDT_10362 | 20 | 10823..11012 | 44   | hypothetical protein                       | - | 0     |
| PDT_10363 | 20 | 13988..14479 | 163  | alpha/beta hydrolase fold domain protein   | - | 0     |
| PDT_10364 | 20 | 17745..17965 | 23   | hypothetical protein                       | - | 0     |
| PDT_10365 | 20 | 20651..23016 | 368  | hypothetical protein                       | - | 0     |
| PDT_10366 | 20 | 24619..25290 | 223  | hypothetical protein                       | - | 0     |
| PDT_10367 | 20 | 27055..27656 | 110  | hypothetical protein                       | - | 0     |
| PDT_10368 | 20 | 28234..33079 | 981  | exo- $\beta$ -1,3-glucanase                | - | 0     |
| PDT_10369 | 20 | 34044..41393 | 1455 | chitinase                                  | - | 1.1   |
| PDT_10371 | 20 | 44405..44698 | 97   | hypothetical protein                       | - | 0     |
| PDT_10374 | 20 | 53066..54248 | 278  | cyclin-dependent protein kinase            | - | 6.88  |
| PDT_10375 | 20 | 55228..56414 | 375  | hypothetical protein                       | - | 0.83  |

|           |    |                |     |                                 |   |       |
|-----------|----|----------------|-----|---------------------------------|---|-------|
| PDT_10376 | 20 | 57567..59162   | 531 | hypothetical protein            | - | 0     |
| PDT_10377 | 20 | 59771..60448   | 191 | hypothetical protein            | - | 51.71 |
| PDT_10379 | 20 | 61373..63388   | 640 | hypothetical protein            | - | 11.83 |
| PDT_10380 | 20 | 66416..67650   | 372 | hypothetical protein            | - | 46.21 |
| PDT_10381 | 20 | 69834..70013   | 59  | hypothetical protein            | - | 0.83  |
| PDT_10382 | 20 | 70464..70679   | 71  | hypothetical protein            | - | 2.75  |
| PDT_10383 | 20 | 73045..74717   | 522 | hypothetical protein            | - | 3.58  |
| PDT_10384 | 20 | 77832..81558   | 988 | NACHT domain protein            | - | 8.53  |
| PDT_10385 | 20 | 82038..83021   | 327 | hypothetical protein            | - | 16.5  |
| PDT_10386 | 20 | 83200..84549   | 449 | hypothetical protein            | - | 5.78  |
| PDT_10387 | 20 | 87507..88271   | 254 | allergen Asp F4-like            | - | 0.83  |
| PDT_10388 | 20 | 89882..90460   | 192 | hypothetical protein            | - | 2.48  |
| PDT_10389 | 20 | 91845..93019   | 372 | NACHT domain protein            | - | 3.58  |
| PDT_10390 | 20 | 93173..93481   | 102 | hypothetical protein            | - | 1.38  |
| PDT_10391 | 20 | 93525..95117   | 310 | WD40 domain protein             | - | 0.83  |
| PDT_10392 | 20 | 98139..99530   | 463 | hypothetical protein            | - | 4.95  |
| PDT_10393 | 20 | 101678..103730 | 439 | serine/threonine-protein kinase | - | 0     |
| PDT_10394 | 20 | 104316..106047 | 465 | patatin-like phospholipase      | - | 0.55  |
| PDT_10395 | 20 | 107504..108040 | 178 | hypothetical protein            | - | 1.38  |
| PDT_10396 | 20 | 111460..112652 | 363 | hypothetical protein            | - | 0     |
| PDT_10397 | 20 | 113928..114365 | 145 | ankyrin repeat protein          | - | 20.08 |
| PDT_10398 | 20 | 118064..118914 | 262 | ferric-chelate reductase        | - | 0     |
| PDT_10399 | 20 | 121259..123025 | 224 | hypothetical protein            | - | 1.93  |
| PDT_10400 | 20 | 128378..128803 | 119 | hypothetical protein            | - | 0     |
| PDT_10401 | 20 | 137550..138365 | 252 | hypothetical protein            | - | 15.95 |
| PDT_10402 | 20 | 141254..141744 | 125 | hypothetical protein            | - | 0     |
| PDT_10403 | 20 | 142859..143395 | 159 | hypothetical protein            | - | 5.23  |
| PDT_10404 | 20 | 144494..146549 | 552 | hypothetical protein            | - | 37.96 |
| PDT_10406 | 20 | 151121..151866 | 235 | hypothetical protein            | - | 23.93 |
| PDT_10407 | 20 | 152653..153192 | 179 | hypothetical protein            | - | 0     |
| PDT_10408 | 20 | 156814..157666 | 248 | hypothetical protein            | - | 7.43  |
| PDT_10409 | 20 | 158669..159863 | 312 | hypothetical protein            | - | 56.39 |
| PDT_10410 | 20 | 160755..161132 | 125 | hypothetical protein            | - | 0.55  |
| PDT_10411 | 20 | 163003..164498 | 197 | hypothetical protein            | - | 0.55  |
| PDT_10412 | 20 | 164921..167278 | 320 | hypothetical protein            | - | 0     |
| PDT_10413 | 20 | 168336..168943 | 179 | hypothetical protein            | - | 1.38  |
| PDT_10414 | 20 | 172715..172810 | 31  | hypothetical protein            | - | 2.48  |
| PDT_10416 | 20 | 176870..178414 | 361 | hypothetical protein            | - | 1.38  |
| PDT_10417 | 20 | 181018..182121 | 367 | hypothetical protein            | - | 77.02 |
| PDT_10418 | 20 | 183069..185903 | 802 | NACHT domain protein            | - | 15.68 |
| PDT_10419 | 20 | 188014..188478 | 154 | hypothetical protein            | - | 0     |

|           |    |                |     |                                             |   |        |
|-----------|----|----------------|-----|---------------------------------------------|---|--------|
| PDT_10420 | 20 | 195141..195293 | 50  | hypothetical protein                        | - | 0      |
| PDT_10421 | 20 | 196046..198636 | 216 | hypothetical protein                        | - | 0      |
| PDT_10422 | 20 | 199676..200225 | 134 | hypothetical protein                        | - | 0.55   |
| PDT_10423 | 20 | 203538..204380 | 280 | hypothetical protein                        | - | 17.33  |
| PDT_10424 | 20 | 204740..206333 | 514 | phosphotransferase<br>enzyme family protein | - | 35.48  |
| PDT_10425 | 20 | 208160..208796 | 171 | hypothetical protein                        | - | 257.18 |
| PDT_10426 | 20 | 209013..209972 | 319 | hypothetical protein                        | - | 47.04  |
| PDT_10427 | 20 | 210358..210854 | 149 | hypothetical protein                        | - | 0      |
| PDT_10428 | 20 | 211089..211388 | 99  | hypothetical protein                        | - | 0      |
| PDT_10429 | 20 | 213697..215361 | 462 | hypothetical protein                        | - | 0.55   |
| PDT_10430 | 20 | 216826..217480 | 178 | ribonuclease                                | - | 0      |
| PDT_10431 | 20 | 219505..220938 | 372 | ferric-chelate reductase                    | - | 1.65   |
| PDT_10432 | 20 | 223288..223821 | 177 | hypothetical protein                        | - | 0.83   |
| PDT_10433 | 20 | 225273..225671 | 132 | hypothetical protein                        | - | 0      |
| PDT_10434 | 21 | 172..804       | 210 | hypothetical protein                        | - | 0      |
| PDT_10435 | 21 | 1123..1685     | 171 | hypothetical protein                        | - | 3.3    |
| PDT_10436 | 21 | 2509..2895     | 128 | hypothetical protein                        | - | 1.1    |
| PDT_10437 | 21 | 3450..4273     | 237 | hypothetical protein                        | - | 9.35   |
| PDT_10438 | 21 | 6659..7496     | 259 | hypothetical protein                        | - | 15.4   |
| PDT_10439 | 21 | 9113..9800     | 190 | hypothetical protein                        | - | 1.65   |
| PDT_10440 | 21 | 14853..14927   | 24  | hypothetical protein                        | - | 0      |
| PDT_10441 | 21 | 15579..16277   | 151 | hypothetical protein                        | - | 51.99  |
| PDT_10442 | 21 | 17084..17509   | 119 | hypothetical protein                        | - | 0      |
| PDT_10443 | 21 | 21246..21370   | 17  | hypothetical protein                        | - | 0.83   |
| PDT_10445 | 21 | 28078..28791   | 237 | hypothetical protein                        | - | 6.33   |
| PDT_10446 | 21 | 29160..29477   | 64  | hypothetical protein                        | - | 0      |
| PDT_10447 | 21 | 32232..33244   | 300 | hypothetical protein                        | - | 10.73  |
| PDT_10448 | 21 | 33810..36119   | 720 | hypothetical protein                        | - | 0.83   |
| PDT_10449 | 21 | 37640..38620   | 326 | hypothetical protein                        | - | 27.23  |
| PDT_10450 | 21 | 39693..42156   | 655 | NACHT domain protein                        | - | 1.38   |
| PDT_10451 | 21 | 42752..44137   | 461 | hypothetical protein                        | - | 71.24  |
| PDT_10452 | 21 | 44610..45311   | 217 | hypothetical protein                        | - | 0.83   |
| PDT_10453 | 21 | 46861..48117   | 382 | hypothetical protein                        | - | 1.65   |
| PDT_10455 | 22 | 3258..3620     | 120 | hypothetical protein                        | - | 0      |
| PDT_10456 | 22 | 4187..4915     | 160 | hypothetical protein                        | - | 0      |
| PDT_10457 | 22 | 5087..5786     | 90  | hypothetical protein                        | - | 0      |
| PDT_10458 | 22 | 11927..12472   | 142 | hypothetical protein                        | - | 0      |
| PDT_10459 | 22 | 13743..14127   | 111 | hypothetical protein                        | - | 16.23  |
| PDT_10460 | 22 | 15163..15954   | 224 | hypothetical protein                        | - | 2.75   |
| PDT_10461 | 22 | 16581..19726   | 963 | patatin-like<br>phospholipase               | - | 48.69  |
| PDT_10462 | 22 | 19897..20067   | 56  | hypothetical protein                        | - | 3.3    |

|           |    |              |     |                                       |   |   |
|-----------|----|--------------|-----|---------------------------------------|---|---|
| PDT_10463 | 22 | 20944..23614 | 789 | retroelement reverse<br>transcriptase | - | 0 |
|-----------|----|--------------|-----|---------------------------------------|---|---|

**Table S5.** Cellulases and hemicellulases with amino acid sequence variations between *P. decumbens* 114-2 and JU-A10-T.

| Protein ID            |           | Function prediction                         | CAZy family | Amino acid position <sup>a</sup> | Mutation    | Affected PFAM domain <sup>b</sup> | Detected in secretome | Notes <sup>c</sup>             |
|-----------------------|-----------|---------------------------------------------|-------------|----------------------------------|-------------|-----------------------------------|-----------------------|--------------------------------|
| 114-2                 | JU-A10-T  |                                             |             |                                  |             |                                   |                       |                                |
| <b>Cellulases</b>     |           |                                             |             |                                  |             |                                   |                       |                                |
| PDE_07945             | PDT_08213 | cellobiohydrolase                           | GH7         | 489                              | T->-        |                                   | Yes                   | nonconserved aa, linker region |
| PDE_07929             | PDT_08197 | endo-beta-1,4-glucanase                     | GH7         | 411                              | +T          |                                   | Yes                   | nonconserved aa, linker region |
| PDE_00698             | PDT_00728 | endo-beta-1,4-glucanase                     | GH61        | 299                              | +SSSGSSSSGS |                                   |                       | nonconserved aa, linker region |
| PDE_01261             | PDT_01326 | endo-beta-1,4-glucanase                     | GH61        | 264                              | G->V        |                                   |                       | nonconserved aa, linker region |
|                       |           |                                             |             | 268                              | A->T        |                                   |                       | nonconserved aa, linker region |
|                       |           |                                             |             | 280                              | L->S        |                                   |                       | nonconserved aa, linker region |
|                       |           |                                             |             | 300                              | T->A        |                                   |                       | nonconserved aa, linker region |
|                       |           |                                             |             | 308                              | +GSGSGP     |                                   |                       | nonconserved aa, linker region |
|                       |           |                                             |             | 355                              | S->T        |                                   |                       | nonconserved aa                |
| PDE_03711             | PDT_03921 | endo-beta-1,4-glucanase                     | GH5         | 364                              | T->-        |                                   |                       | nonconserved aa, linker region |
| PDE_09226             | PDT_09527 | endo-beta-1,4-glucanase                     | GH5         | 352                              | +TTTKAPV    |                                   | Yes                   | nonconserved aa, linker region |
| PDE_09969             | PDT_10285 | endo-beta-1,4-glucanase                     | GH5         | 602                              | V->G        |                                   | Yes                   | nonconserved aa                |
| <b>Hemicellulases</b> |           |                                             |             |                                  |             |                                   |                       |                                |
| PDE_06067             | PDT_06294 | alpha-L-arabinofuranosidase                 | GH43        | 130                              | S->P        | Glyco_hydro_43                    | Yes                   | nonconserved aa                |
| PDE_06665             | PDT_06909 | alpha-L-arabinofuranosidase                 | GH43        | 216                              | Q->R        | Glyco_hydro_43                    |                       | nonconserved aa                |
| PDE_07334             | PDT_07593 | beta-xylosidase/alpha-L-arabinofuranosidase | GH43        | 260                              | R->S        | Glyco_hydro_43                    | Yes                   | nonconserved aa                |
|                       |           |                                             |             | 373                              | F->S        |                                   |                       | nonconserved aa                |
|                       |           |                                             |             | 412                              | L->I        |                                   |                       | nonconserved aa                |
| PDE_02583             | PDT_02715 | endo-beta-1,4-galactanase                   | GH53        | 307                              | A->T        | Glyco_hydro_53                    | Yes                   | nonconserved aa                |
| PDE_03401             | PDT_03594 | alpha-galactosidase                         | GH27        | 4                                | V->I        |                                   |                       | nonconserved aa                |

|           |           |                                                          |                  |     |      |                 |  |                 |
|-----------|-----------|----------------------------------------------------------|------------------|-----|------|-----------------|--|-----------------|
| PDE_05594 | PDT_05828 | alpha-galactosidase                                      | GH36             | 321 | E->D |                 |  | nonconserved aa |
| PDE_03572 | PDT_03773 | alpha-glucuronidase                                      | GH67             | 238 | Q->K | Glyco_hydro_67M |  | nonconserved aa |
| PDE_07013 | PDT_07267 | alpha-glucuronidase and N-acetyl<br>beta-glucosaminidase | GH67 and<br>GH84 | 13  | G->V |                 |  | nonconserved aa |
|           |           |                                                          |                  | 80  | A->V | Glyco_hydro_67N |  | nonconserved aa |
|           |           |                                                          |                  | 418 | R->C | NAGidase        |  | nonconserved aa |
|           |           |                                                          |                  | 629 | R->K |                 |  | nonconserved aa |
| PDE_08238 | PDT_08506 | feruloyl esterase                                        | CE1              | 298 | P->A |                 |  | nonconserved aa |

<sup>a</sup> Amino acid positions refer to those in 114-2 proteins.

<sup>b</sup> Affected domains were identified according to the envelope domain boundaries in Pfam prediction result.

<sup>c</sup> Conservation of amino acid residues was analyzed using BLASTp search against the NCBI nonredundant database.

**Table S6.** Secreted proteins identified by LC-MS/MS and 2DE-MS/MS in *P. decumbens*.

| Protein ID            |           | Name    | Function prediction       | CAZy family | Secretion prediction | Analyzing methods | Protein ratios <sup>a</sup> |          | Transcription levels in CW medium (tags per million) |          |
|-----------------------|-----------|---------|---------------------------|-------------|----------------------|-------------------|-----------------------------|----------|------------------------------------------------------|----------|
| 114-2                 | JU-A10-T  |         |                           |             |                      |                   | 114-2                       | JU-A10-T | 114-2                                                | JU-A10-T |
| <b>Cellulases</b>     |           |         |                           |             |                      |                   |                             |          |                                                      |          |
| PDE_05445             | PDT_05682 | Cel7A-1 | cellobiohydrolase         | GH7         | Yes                  | LC-MS/MS          | 0.09%                       | 3.46%    | 18.7                                                 | 657.4    |
| PDE_07945             | PDT_08213 | Cel7A-2 | cellobiohydrolase         | GH7         | Yes                  | Both              | 9.59%                       | 19.92%   | 1192.38                                              | 6732.45  |
| PDE_07124             | PDT_07378 | Cel6A   | cellobiohydrolase         | GH6         | Yes                  | Both              | 1.50%                       | 7.38%    | 1271.26                                              | 17660.16 |
| PDE_00507             | PDT_00525 | Cel5A   | endo-beta-1,4-glucanase   | GH5         |                      | LC-MS/MS          | 0.22%                       | 1.53%    | 472.6                                                | 7469.89  |
| PDE_09226             | PDT_09527 | Cel5B   | endo-beta-1,4-glucanase   | GH5         | Yes                  | Both              | 2.46%                       | 5.39%    | 564.4                                                | 5622.84  |
| PDE_09969             | PDT_10285 | Cel5C   | endo-beta-1,4-glucanase   | GH5         | Yes                  | 2DE-MS/MS         | -                           | -        | 248.2                                                | 2162.82  |
| PDE_05193             | PDT_05427 | Cel5D   | endo-beta-1,4-glucanase   | GH5         | Yes                  | LC-MS/MS          | -                           | -        | 10.2                                                 | 40.98    |
| PDE_05633             | PDT_05867 | Cel61A  | endo-beta-1,4-glucanase   | GH61        |                      | Both              | 5.58%                       | 14.59%   | 2422.5                                               | 3991.44  |
| PDE_06439             | PDT_06673 | Cel12A  | endo-beta-1,4-glucanase   | GH12        | Yes                  | 2DE-MS/MS         | -                           | -        | 21.42                                                | 698.11   |
| PDE_07929             | PDT_08197 | Cel7B   | endo-beta-1,4-glucanase   | GH7         | Yes                  | LC-MS/MS          | 1.85%                       | 4.65%    | 246.16                                               | 357.86   |
| PDE_02102             | PDT_02199 | SWO     | swollenin                 | -           | Yes                  | LC-MS/MS          | 0.26%                       | 1.36%    | 1170.96                                              | 10282.14 |
| <b>Hemicellulases</b> |           |         |                           |             |                      |                   |                             |          |                                                      |          |
| PDE_01302             | PDT_01369 | Axe2A   | acetyl xylan esterase     | CE2         | Yes                  | LC-MS/MS          | -                           | -        | 49.64                                                | 133.13   |
| PDE_04182             | PDT_04384 | Axe5A   | acetyl xylan esterase     | CE5         | Yes                  | 2DE-MS/MS         | -                           | -        | 42.16                                                | 306.15   |
| PDE_09278             | PDT_09582 | Axe1A   | acetyl xylan esterase     | CE1         | Yes                  | Both              | 0.48%                       | 0.74%    | 196.18                                               | 495.66   |
| PDE_02583             | PDT_02715 | Gal53A  | endo-beta-1,4-galactanase | GH53        | Yes                  | 2DE-MS/MS         | -                           | -        | 65.28                                                | 211.8    |
| PDE_08094             | PDT_08360 | Xyn10A  | endo-beta-1,4-xylanase    | GH10        | Yes                  | Both              | 3.25%                       | 15.21%   | 388.96                                               | 4945.91  |
| PDE_02418             | PDT_02533 | Xyn10B  | endo-beta-1,4-xylanase    | GH10        | Yes                  | Both              | 0.13%                       | 1.48%    | 125.46                                               | 575.98   |
| PDE_00752             | PDT_00783 | Xyn10C  | endo-beta-1,4-xylanase    | GH10        | Yes                  | LC-MS/MS          | -                           | -        | 11.22                                                | 71.24    |



|                  |           |        |                                                 |      |     |           |        |       |          |         |
|------------------|-----------|--------|-------------------------------------------------|------|-----|-----------|--------|-------|----------|---------|
| PDE_02101        | PDT_02197 | Xyn11A | endo-beta-1,4-xylanase                          | GH11 | Yes | Both      | 0.04%  | 0.28% | 366.18   | 4728.06 |
| PDE_02682        | PDT_02819 | Xyn11B | endo-beta-1,4-xylanase                          | GH11 | Yes | 2DE-MS/MS | -      | -     | 60.86    | 3927.63 |
| PDE_04478        | PDT_04677 | Xyn11C | endo-beta-1,4-xylanase                          | GH11 | Yes | 2DE-MS/MS | -      | -     | 205.36   | 1122.53 |
| PDE_03573        | PDT_03774 | Xyn30A | endo-beta-1,4-xylanase                          | GH30 | Yes | 2DE-MS/MS | -      | -     | 18.02    | 131.21  |
| PDE_00014        | PDT_00016 | Xyn30B | endo-beta-1,4-xylanase                          | GH30 | Yes | LC-MS/MS  | -      | -     | 2.04     | 5396.74 |
| PDE_02514        | PDT_02635 | Aga27A | alpha-galactosidase                             | GH27 | Yes | Both      | 0.31%  | 1.02% | 100.64   | 635.95  |
| PDE_06067        | PDT_06294 | Abf43A | alpha-L-arabinofuranosidase                     | GH43 | Yes | LC-MS/MS  | 0.00%  | 0.40% | 18.36    | 77.57   |
| PDE_00015        | PDT_00017 | Abf43B | alpha-L-arabinofuranosidase                     | GH43 | Yes | LC-MS/MS  | -      | -     | 28.9     | 532.25  |
| PDE_07585        | PDT_07848 | Abf43C | alpha-L-arabinofuranosidase                     | GH43 | Yes | LC-MS/MS  | -      | -     | 758.88   | 28.88   |
| PDE_07334        | PDT_07593 | Abf43D | beta-xylosidase/<br>alpha-L-arabinofuranosidase | GH43 | Yes | LC-MS/MS  | -      | -     | 14.96    | 14.3    |
| PDE_00016        | PDT_00018 | Abf62A | alpha-L-arabinofuranosidase                     | GH62 | Yes | Both      | 0.35%  | 0.85% | 54.74    | 920.09  |
| PDE_07897        | PDT_08165 | Abf62B | alpha-L-arabinofuranosidase                     | GH62 | Yes | Both      | 0.00%  | 0.28% | 41.14    | 328.7   |
| PDE_09988        | PDT_10303 | Abf54A | alpha-L-arabinofuranosidase                     | GH54 | Yes | 2DE-MS/MS | -      | -     | 87.04    | 1171.22 |
| PDE_06023        | PDT_06254 | Man5A  | beta-1,4-mannanase                              | GH5  | Yes | LC-MS/MS  | 0.09%  | 0.62% | 125.8    | 8659.54 |
| PDE_00049        | PDT_00051 | Xyl3A  | beta-xylosidase                                 | GH3  | Yes | LC-MS/MS  | -      | -     | 29.58    | 58.31   |
| PDE_06649        | PDT_06892 | Fae1A  | feruloyl esterase                               | CE1  | Yes | 2DE-MS/MS | -      | -     | 304.64   | 145.23  |
| <b>Amylases</b>  |           |        |                                                 |      |     |           |        |       |          |         |
| PDE_09417        | PDT_09727 | Amy15A | glucoamylase                                    | GH15 | Yes | Both      | 28.85% | 4.60% | 4429.53  | 41.81   |
| PDE_05527        | PDT_05762 | Amy15B | glucoamylase                                    | GH15 | Yes | LC-MS/MS  | -      | -     | 194.82   | 23.11   |
| PDE_01201        | PDT_01258 | Amy13A | alpha-amylase                                   | GH13 | Yes | Both      | 10.95% | 0.51% | 7288.59  | 65.74   |
| PDE_01021        | PDT_01062 | Amy13B | alpha-amylase                                   | GH13 |     | LC-MS/MS  | -      | -     | 32.64    | 14.58   |
| PDE_03966        | PDT_04195 | Agl31A | alpha-glucosidase                               | GH31 | Yes | LC-MS/MS  | 0.88%  | 0.00% | 587.86   | 1.65    |
| <b>Proteases</b> |           |        |                                                 |      |     |           |        |       |          |         |
| PDE_07927        | PDT_08195 | PepB   | aspartic protease                               | -    | Yes | Both      | 6.16%  | 0.17% | 10281.61 | 245.08  |

|                       |           |        |                                                      |      |     |           |       |       |         |        |
|-----------------------|-----------|--------|------------------------------------------------------|------|-----|-----------|-------|-------|---------|--------|
|                       |           |        | penicillopepsin                                      |      |     |           |       |       |         |        |
| PDE_07344             | PDT_07603 | PepC   | aspartic protease<br>penicillopepsin                 | -    | Yes | LC-MS/MS  | 0.88% | 0.00% | 633.08  | 260.48 |
| PDE_07933             | PDT_08201 | PepD   | glutamic peptidase                                   | -    | Yes | LC-MS/MS  | -     | -     | 223.04  | 460.18 |
| PDE_01200             | PDT_01257 | PepE   | serine peptidase                                     | -    | Yes | LC-MS/MS  | -     | -     | 416.84  | 183.47 |
| PDE_01282             | PDT_01349 | PepF   | serine peptidase                                     | -    | Yes | LC-MS/MS  | -     | -     | 43.18   | 3.3    |
| PDE_01353             | PDT_01430 | PepG   | serine peptidase                                     | -    | Yes | LC-MS/MS  | -     | -     | 48.28   | 15.4   |
| PDE_06031             | PDT_06262 | PepH   | serine peptidase                                     | -    | Yes | LC-MS/MS  | -     | -     | 182.24  | 26.41  |
| PDE_08082             | PDT_08347 | PepI   | serine peptidase                                     | -    | Yes | LC-MS/MS  | -     | -     | 42.5    | 61.61  |
| <b>Other proteins</b> |           |        |                                                      |      |     |           |       |       |         |        |
| PDE_02736             | PDT_02878 | BGLI   | beta-glucosidase                                     | GH3  | Yes | Both      | 3.39% | 1.19% | 559.64  | 581.21 |
| PDE_04162             | PDT_04363 | Pga28A | endopolygalacturonase                                | GH28 | Yes | LC-MS/MS  | -     | -     | 173.06  | 435.98 |
| PDE_01385             | PDT_01462 | Rgl4A  | rhamnogalacturonan lyase                             | PL4  | Yes | LC-MS/MS  | 0.00% | 0.62% | 11.9    | 157.06 |
| PDE_08122             | PDT_08390 | Chi18A | chitinase                                            | GH18 | Yes | Both      | 4.93% | 2.44% | 5407.03 | 318.8  |
| PDE_01779             | PDT_01865 | Chi18B | chitinase                                            | GH18 | Yes | 2DE-MS/MS | -     | -     | 258.4   | 0      |
| PDE_00333             | PDT_00341 | Man47A | alpha-mannosidase                                    | GH47 | Yes | LC-MS/MS  | 0.48% | 0.17% | 556.58  | 92.15  |
| PDE_08139             | PDT_08407 | Bgn55A | exo-beta-1,3-glucanase                               | GH55 | Yes | LC-MS/MS  | 0.92% | 0.11% | 696.32  | 11.83  |
| PDE_02004             | PDT_02092 | Bgn30A | beta-1,6-glucanase                                   | GH30 | Yes | LC-MS/MS  | 0.48% | 0.11% | 59.16   | 20.35  |
| PDE_06138             | PDT_06369 | Ecm33  | GPI-anchored cell wall<br>organization protein Ecm33 | -    |     | LC-MS/MS  | 0.26% | 0.91% | 470.22  | 520.42 |
| PDE_03296             | PDT_03477 | Mur25A | lysozyme/muramidase                                  | GH25 | Yes | Both      | 1.76% | 0.34% | 1000.28 | 39.61  |
| PDE_04519             | PDT_04720 | EBP1   | IgE-binding protein                                  | -    | Yes | LC-MS/MS  | 0.48% | 0.00% | 811.24  | 105.62 |
| PDE_05097             | PDT_05330 | AEP1   | aldose 1-epimerase                                   | -    | Yes | 2DE-MS/MS | -     | -     | 43.18   | 253.88 |
| PDE_03255             | PDT_03434 | ACP1   | allergenic cerato-platanin                           | -    | Yes | 2DE-MS/MS | -     | -     | 1734.68 | 5.5    |
| PDE_01335             | PDT_01406 | PGAM1  | phosphoglycerate mutase                              | -    | Yes | Both      | 0.84% | 0.00% | 2162.4  | 124.05 |

|           |           |        |                                                                        |      |     |           |       |       |         |        |
|-----------|-----------|--------|------------------------------------------------------------------------|------|-----|-----------|-------|-------|---------|--------|
| PDE_05941 | PDT_06172 | Nuc1   | nuclease                                                               | -    | Yes | 2DE-MS/MS | -     | -     | 184.96  | 40.43  |
| PDE_01330 | PDT_01400 | RNase1 | guanyl-specific ribonuclease                                           | -    | Yes | LC-MS/MS  | 0.35% | 0.00% | 2.72    | 1.65   |
| PDE_02801 | PDT_02948 | Gus2A  | beta-glucuronidase                                                     | GH2  | Yes | LC-MS/MS  | 0.00% | 0.57% | 357.34  | 44.56  |
| PDE_03474 | PDT_03671 | DO1    | dioxygenase                                                            | -    | Yes | LC-MS/MS  | 0.00% | 0.57% | 0       | 4.95   |
| PDE_07803 | PDT_08072 | HP1    | hypothetical protein containing six-hairpin glycosidase domain DUF1237 | -    | Yes | LC-MS/MS  | 1.28% | 0.00% | 311.78  | 4.95   |
| PDE_00503 | PDT_00521 | HP2    | hypothetical protein                                                   | -    | Yes | 2DE-MS/MS | -     | -     | 263.16  | 55.01  |
| PDE_06089 | PDT_06318 | HP3    | hypothetical protein                                                   | -    | Yes | 2DE-MS/MS | -     | -     | 3065.44 | 240.13 |
| PDE_00401 | PDT_00409 |        | chitin glucanosyltransferase                                           | GH16 |     | LC-MS/MS  | -     | -     | 31.96   | 7.98   |
| PDE_05263 | PDT_05498 |        | chitin glucanosyltransferase                                           | GH16 |     | LC-MS/MS  | -     | -     | 352.92  | 151.83 |
| PDE_07531 | PDT_07793 |        | chitin glucanosyltransferase                                           | GH16 |     | LC-MS/MS  | -     | -     | 1.02    | 18.98  |
| PDE_03112 | PDT_03282 |        | exo-beta-1,3-glucanase                                                 | GH17 |     | LC-MS/MS  | -     | -     | 210.12  | 58.04  |
| PDE_01280 | PDT_01346 |        | exo-beta-glucosaminidase                                               | GH2  | Yes | LC-MS/MS  | -     | -     | 158.1   | 4.95   |
| PDE_06511 | PDT_06746 |        | beta-1,6-N-acetylglucosaminidase                                       | GH20 | Yes | LC-MS/MS  | -     | -     | 55.08   | 17.6   |
| PDE_06400 | PDT_06632 |        | beta-N-acetylhexosaminidase                                            | GH3  | Yes | LC-MS/MS  | -     | -     | 265.2   | 70.14  |
| PDE_00282 | PDT_00289 |        | beta-galactosidase                                                     | GH35 | Yes | LC-MS/MS  | -     | -     | 99.28   | 68.22  |
| PDE_05515 | PDT_05750 |        | beta-1,3-glucanase                                                     | GH64 |     | LC-MS/MS  | -     | -     | 285.26  | 28.61  |
| PDE_03452 | PDT_03648 |        | beta-1,3-glucanosyltransglycosylase                                    | GH72 |     | LC-MS/MS  | -     | -     | 56.78   | 232.43 |
| PDE_04618 | PDT_04823 |        | beta-1,3-glucanosyltransglycosylase                                    | GH72 |     | LC-MS/MS  | -     | -     | 534.14  | 147.16 |
| PDE_08733 | PDT_09023 |        | chitosanase                                                            | GH75 | Yes | LC-MS/MS  | -     | -     | 20.06   | 0.83   |
| PDE_01949 | PDT_02037 |        | beta-glucuronidase                                                     | GH79 | Yes | LC-MS/MS  | -     | -     | 31.28   | 1.1    |

|           |           |  |                                                       |   |     |          |   |   |         |         |
|-----------|-----------|--|-------------------------------------------------------|---|-----|----------|---|---|---------|---------|
| PDE_07606 | PDT_07871 |  | 6-hydroxy-D-nicotine oxidase                          | - | Yes | LC-MS/MS | - | - | 23.46   | 15.13   |
| PDE_08180 | PDT_08448 |  | 6-hydroxy-D-nicotine oxidase                          | - | Yes | LC-MS/MS | - | - | 4.08    | 1.1     |
| PDE_01372 | PDT_01449 |  | acid phosphatase                                      | - | Yes | LC-MS/MS | - | - | 188.7   | 13.2    |
| PDE_01404 | PDT_01481 |  | catalase                                              | - | Yes | LC-MS/MS | - | - | 4.42    | 19.53   |
| PDE_02596 | PDT_02731 |  | elongation factor EF-1 alpha subunit                  | - |     | LC-MS/MS | - | - | 1088.68 | 1539.53 |
| PDE_01798 | PDT_01885 |  | glutaminase                                           | - | Yes | LC-MS/MS | - | - | 321.64  | 8.53    |
| PDE_02379 | PDT_02490 |  | heat shock protein 70                                 | - |     | LC-MS/MS | - | - | 1965.88 | 274.79  |
| PDE_05537 | PDT_05771 |  | lysophospholipase                                     | - |     | LC-MS/MS | - | - | 668.44  | 178.24  |
| PDE_00500 | PDT_00518 |  | non-hemolytic phospholipase C precursor               | - | Yes | LC-MS/MS | - | - | 346.12  | 22.56   |
| PDE_04950 | PDT_05181 |  | prenylcysteine oxidase                                | - | Yes | LC-MS/MS | - | - | 27.54   | 34.38   |
| PDE_04101 | PDT_04304 |  | related to blastomyces yeast phase-specific protein 1 | - |     | LC-MS/MS | - | - | 2964.46 | 16.78   |
| PDE_00092 | PDT_00094 |  | ribonuclease T2                                       | - | Yes | LC-MS/MS | - | - | 200.94  | 65.74   |
| PDE_05044 | PDT_05276 |  | serine/threonine-protein kinase                       | - |     | LC-MS/MS | - | - | 10.88   | 14.3    |
| PDE_04579 | PDT_04781 |  | tubulin alpha                                         | - |     | LC-MS/MS | - | - | 347.82  | 196.67  |
| PDE_01168 | PDT_01220 |  | hypothetical protein                                  | - | Yes | LC-MS/MS | - | - | 214.54  | 14.3    |
| PDE_01346 | PDT_01419 |  | hypothetical protein                                  | - | Yes | LC-MS/MS | - | - | 59.84   | 8.25    |
| PDE_02536 | PDT_02658 |  | hypothetical protein                                  | - |     | LC-MS/MS | - | - | 92.82   | 77.57   |
| PDE_02854 | PDT_03005 |  | hypothetical protein                                  | - | Yes | LC-MS/MS | - | - | 350.2   | 1.38    |
| PDE_03340 | PDT_03525 |  | hypothetical protein                                  | - |     | LC-MS/MS | - | - | 124.1   | 147.16  |
| PDE_04403 | PDT_04605 |  | hypothetical protein                                  | - |     | LC-MS/MS | - | - | 73.44   | 2.75    |
| PDE_04506 | PDT_04706 |  | hypothetical protein                                  | - | Yes | LC-MS/MS | - | - | 50.66   | 20.35   |
| PDE_07106 | PDT_07361 |  | hypothetical protein                                  | - | Yes | LC-MS/MS | - | - | 9511.85 | 400.49  |

|           |           |  |                      |   |     |          |   |   |        |        |
|-----------|-----------|--|----------------------|---|-----|----------|---|---|--------|--------|
| PDE_07911 | PDT_08179 |  | hypothetical protein | - |     | LC-MS/MS | - | - | 476    | 1736.2 |
| PDE_09289 | PDT_09594 |  | hypothetical protein | - | Yes | LC-MS/MS | - | - | 265.54 | 24.21  |

<sup>a</sup> Protein ratios were calculated using peptide counts of corresponding protein groups obtained in LC-MS/MS.

**Table S7.** Statistics of digital gene expression profiling in *P. decumbens* 114-2 and JU-A10-T.

|                                         | <b>114-2</b>       | <b>JU-A10-T</b>    |
|-----------------------------------------|--------------------|--------------------|
| <b>Raw data processing</b>              |                    |                    |
| Total number of raw tags                | 3,137,364          | 3,741,500          |
| Distinct number of raw tags             | 215,965            | 168,718            |
| Total number of clean tags              | 2,941,173          | 3,635,528          |
| Distinct number of clean tags           | 76,923             | 67,784             |
| <b>Mapping Tags to genes</b>            |                    |                    |
| Total number of tags mapped to genes    | 1,967,160 (66.88%) | 2,091,900 (57.54%) |
| Distinct number of tags mapped to genes | 23,370 (30.38%)    | 16,669 (24.59%)    |
| Number of tag-mapped genes              | 8,456 (84.38%)     | 8,213 (78.42%)     |

**Table S8.** Manually checked sequence variations in cellulase gene promoters between 114-2 and JU-A10-T.

| Gene ID   | Function prediction     | CAZy family | Nucleotide position <sup>a</sup> | Mutation | Affected transcription factor binding motifs |
|-----------|-------------------------|-------------|----------------------------------|----------|----------------------------------------------|
| PDE_05445 | cellobiohydrolase       | GH7         | -143                             | G->T     |                                              |
|           |                         |             | -258                             | G->C     |                                              |
|           |                         |             | -478                             | G->A     |                                              |
|           |                         |             | -526                             | A->G     |                                              |
|           |                         |             | -714                             | C->T     |                                              |
|           |                         |             | -752                             | G->A     | CreA (adjacent 5'-SYGGRG-3' motifs)          |
|           |                         |             | -891                             | G->A     |                                              |
|           |                         |             | -1067                            | C->T     |                                              |
|           |                         |             | -1069                            | C->T     |                                              |
|           |                         |             | -1251                            | A->G     |                                              |
| -1333     | T->A                    |             |                                  |          |                                              |
| PDE_07945 | cellobiohydrolase       | GH7         | -491                             | G->T     |                                              |
|           |                         |             | (-1066)-(-1064)                  | AAG->-   |                                              |
|           |                         |             | -1142                            | G->-     |                                              |
|           |                         |             | -1438                            | C->G     |                                              |
| PDE_00507 | endo-beta-1,4-glucanase | GH5         | -19                              | C->T     |                                              |
|           |                         |             | -25                              | A->G     |                                              |
|           |                         |             | -201                             | T->C     |                                              |
|           |                         |             | -284                             | +AGA     |                                              |
|           |                         |             | -752                             | +T       |                                              |
|           |                         |             | -794                             | G->A     |                                              |
|           |                         |             | -1156                            | T->C     |                                              |
|           |                         |             | -1303                            | +AGAGA   |                                              |
| -1353     | C->T                    |             |                                  |          |                                              |
| PDE_09969 | endo-beta-1,4-glucanase | GH5         | -975                             | G->-     |                                              |
| PDE_03711 | endo-beta-1,4-glucanase | GH5         | (-153)-(-152)                    | CT->-    |                                              |
| PDE_09267 | endo-beta-1,4-glucanase | GH5         | -13                              | C->T     |                                              |
| PDE_06439 | endo-beta-1,4-glucanase | GH12        | -688                             | G->A     |                                              |
|           |                         |             | -1004                            | T->C     |                                              |
| PDE_07928 | endo-beta-1,4-glucanase | GH45        | -547                             | T->C     |                                              |
| PDE_00698 | endo-beta-1,4-glucanase | GH61        | -420                             | T->A     |                                              |
|           |                         |             | -1174                            | T->G     |                                              |
|           |                         |             | -1207                            | C->T     |                                              |
| PDE_01261 | endo-beta-1,4-glucanase | GH61        | -2                               | C->G     |                                              |
|           |                         |             | -10                              | A->C     |                                              |
|           |                         |             | -48                              | G->A     |                                              |
|           |                         |             | -52                              | A->G     |                                              |

|  |  |  |                 |              |  |
|--|--|--|-----------------|--------------|--|
|  |  |  | -69             | C->T         |  |
|  |  |  | -93             | G->T         |  |
|  |  |  | -113            | G->A         |  |
|  |  |  | -184            | C->T         |  |
|  |  |  | -231            | A->C         |  |
|  |  |  | -275            | A->G         |  |
|  |  |  | -297            | G->-         |  |
|  |  |  | -402            | A->T         |  |
|  |  |  | -426            | T->C         |  |
|  |  |  | -459            | C->T         |  |
|  |  |  | -481            | T->G         |  |
|  |  |  | -510            | C->T         |  |
|  |  |  | -513            | G->T         |  |
|  |  |  | (-524)-(-522)   | TAA->A<br>GC |  |
|  |  |  | -541            | A->G         |  |
|  |  |  | -545            | A->G         |  |
|  |  |  | -547            | C->T         |  |
|  |  |  | -573            | A->G         |  |
|  |  |  | -581            | C->T         |  |
|  |  |  | -602            | T->C         |  |
|  |  |  | -623            | T->C         |  |
|  |  |  | (-626)-(-625)   | CG->TA       |  |
|  |  |  | -632            | C->T         |  |
|  |  |  | -634            | A->G         |  |
|  |  |  | -637            | A->G         |  |
|  |  |  | -652            | A->C         |  |
|  |  |  | -655            | +C           |  |
|  |  |  | -681            | T->C         |  |
|  |  |  | -743            | A->G         |  |
|  |  |  | -791            | G->A         |  |
|  |  |  | -800            | G->A         |  |
|  |  |  | -811            | G->A         |  |
|  |  |  | -843            | T->C         |  |
|  |  |  | -913            | T->A         |  |
|  |  |  | -942            | G->A         |  |
|  |  |  | -983            | G->A         |  |
|  |  |  | (-1046)-(-1045) | AA->GG       |  |
|  |  |  | -1052           | C->T         |  |
|  |  |  | -1063           | A->G         |  |
|  |  |  | -1065           | G->A         |  |
|  |  |  | -1071           | T->C         |  |
|  |  |  | -1122           | A->G         |  |



|           |                         |      |                 |        |  |
|-----------|-------------------------|------|-----------------|--------|--|
|           |                         |      | -1125           | A->C   |  |
|           |                         |      | -1239           | T->A   |  |
|           |                         |      | -1258           | C->A   |  |
|           |                         |      | -1267           | G->T   |  |
|           |                         |      | -1289           | C->T   |  |
|           |                         |      | -1305           | A->G   |  |
|           |                         |      | (-1317)-(-1316) | GT->AG |  |
|           |                         |      | -1358           | A->G   |  |
|           |                         |      | -1361           | G->A   |  |
|           |                         |      | (-1366)-(-1365) | GG->T  |  |
|           |                         |      | -1485           | A->G   |  |
| PDE_06768 | endo-beta-1,4-glucanase | GH61 | -97             | A->G   |  |
|           |                         |      | -100            | T->C   |  |
|           |                         |      | (-240)-(-236)   | AAT->- |  |
|           |                         |      | -267            | C->T   |  |
|           |                         |      | (-299)-(-298)   | AG->GA |  |
|           |                         |      | (-328)-(-327)   | TC->GG |  |
|           |                         |      | -532            | T->C   |  |
|           |                         |      | -545            | A->G   |  |
|           |                         |      | -598            | C->T   |  |
|           |                         |      | -642            | C->G   |  |
|           |                         |      | -685            | T->C   |  |
|           |                         |      | -977            | T->C   |  |
|           |                         |      | -1033           | T->A   |  |
|           |                         |      | -1047           | C->T   |  |
|           |                         |      | -1369           | C->G   |  |
|           |                         |      | -1454           | T->C   |  |

<sup>a</sup> Nucleotides are numbered relative to the start codon in 114-2.

**Table S9.** Gene ontology (GO) enrichment analysis of genes of significantly differential expression between *P. decumbens* 114-2 and JU-A10-T.

GO categories with false discovery rate (FDR)  $\leq 0.05$  are shown.

| GO ID                                             | Description                                          | Category | Number of genes |           | FDR      | Gene IDs                                                                                                                                                                                                                                                                                                                                                                                                                                                                                                                                                                                                                                                                                                                                                                                                                |
|---------------------------------------------------|------------------------------------------------------|----------|-----------------|-----------|----------|-------------------------------------------------------------------------------------------------------------------------------------------------------------------------------------------------------------------------------------------------------------------------------------------------------------------------------------------------------------------------------------------------------------------------------------------------------------------------------------------------------------------------------------------------------------------------------------------------------------------------------------------------------------------------------------------------------------------------------------------------------------------------------------------------------------------------|
|                                                   |                                                      |          | Tested          | Reference |          |                                                                                                                                                                                                                                                                                                                                                                                                                                                                                                                                                                                                                                                                                                                                                                                                                         |
| <b>Up-regulated in JU-A10-T relative to 114-2</b> |                                                      |          |                 |           |          |                                                                                                                                                                                                                                                                                                                                                                                                                                                                                                                                                                                                                                                                                                                                                                                                                         |
| GO:0005576                                        | extracellular region                                 | C        | 44              | 94        | 8.12E-22 | PDE_05931, PDE_05193, PDE_04478, PDE_08094, PDE_07259, PDE_03698, PDE_05998, PDE_08709, PDE_06441, PDE_06439, PDE_02101, PDE_02102, PDE_04162, PDE_04182, PDE_00507, PDE_05210, PDE_02886, PDE_09226, PDE_09278, PDE_03399, PDE_05445, PDE_01261, PDE_03287, PDE_02682, PDE_06023, PDE_00014, PDE_00015, PDE_00016, PDE_07124, PDE_01983, PDE_02583, PDE_07938, PDE_07945, PDE_04768, PDE_06067, PDE_02514, PDE_07928, PDE_07911, PDE_09988, PDE_09969, PDE_01302, PDE_02418, PDE_07897, PDE_03572                                                                                                                                                                                                                                                                                                                      |
| GO:0004553                                        | hydrolase activity, hydrolyzing O-glycosyl compounds | F        | 56              | 177       | 1.42E-18 | PDE_05931, PDE_05193, PDE_04478, PDE_08094, PDE_01690, PDE_05998, PDE_09710, PDE_06441, PDE_06439, PDE_02101, PDE_02102, PDE_07531, PDE_04151, PDE_04152, PDE_06306, PDE_04162, PDE_04182, PDE_00507, PDE_00579, PDE_03010, PDE_05210, PDE_02886, PDE_01750, PDE_09226, PDE_09278, PDE_09279, PDE_09267, PDE_05445, PDE_00615, PDE_01256, PDE_01261, PDE_00752, PDE_02682, PDE_04859, PDE_06023, PDE_00014, PDE_00015, PDE_00016, PDE_07124, PDE_03573, PDE_02583, PDE_07938, PDE_07945, PDE_06067, PDE_02514, PDE_07928, PDE_06944, PDE_07013, PDE_09988, PDE_09969, PDE_01302, PDE_03542, PDE_02418, PDE_07897, PDE_03572, PDE_00076                                                                                                                                                                                  |
| GO:0005975                                        | carbohydrate metabolic process                       | P        | 80              | 342       | 2.13E-18 | PDE_05931, PDE_05193, PDE_04478, PDE_08094, PDE_01690, PDE_07330, PDE_07259, PDE_00398, PDE_01584, PDE_05998, PDE_01540, PDE_05097, PDE_09710, PDE_08709, PDE_06441, PDE_03147, PDE_06439, PDE_01008, PDE_02101, PDE_02102, PDE_02929, PDE_07531, PDE_01899, PDE_04151, PDE_06306, PDE_04162, PDE_03036, PDE_04182, PDE_00507, PDE_00579, PDE_03010, PDE_05210, PDE_09532, PDE_02886, PDE_01750, PDE_09226, PDE_09278, PDE_09279, PDE_09267, PDE_05445, PDE_00615, PDE_01256, PDE_01261, PDE_09398, PDE_00752, PDE_02682, PDE_07688, PDE_07674, PDE_04859, PDE_06023, PDE_00014, PDE_00015, PDE_00016, PDE_07124, PDE_03573, PDE_01924, PDE_02583, PDE_07938, PDE_07945, PDE_06067, PDE_02514, PDE_01468, PDE_09135, PDE_07928, PDE_06944, PDE_04588, PDE_07918, PDE_06951, PDE_07013, PDE_09988, PDE_03452, PDE_09969, |

|            |                                              |   |    |     |          |                                                                                                                                                                                                                                                                                                                                                                                                                                                                                                                                                                                                                                                                         |
|------------|----------------------------------------------|---|----|-----|----------|-------------------------------------------------------------------------------------------------------------------------------------------------------------------------------------------------------------------------------------------------------------------------------------------------------------------------------------------------------------------------------------------------------------------------------------------------------------------------------------------------------------------------------------------------------------------------------------------------------------------------------------------------------------------------|
|            |                                              |   |    |     |          | PDE_01302, PDE_03542, PDE_02418, PDE_07897, PDE_03572, PDE_01385, PDE_00076, PDE_00917                                                                                                                                                                                                                                                                                                                                                                                                                                                                                                                                                                                  |
| GO:0030248 | cellulose binding                            | F | 23 | 29  | 2.48E-18 | PDE_08094, PDE_08709, PDE_02101, PDE_02102, PDE_04182, PDE_00507, PDE_05210, PDE_09226, PDE_09278, PDE_05445, PDE_01261, PDE_02682, PDE_06023, PDE_00014, PDE_00015, PDE_00016, PDE_07124, PDE_07945, PDE_06067, PDE_02514, PDE_07928, PDE_09969, PDE_01302                                                                                                                                                                                                                                                                                                                                                                                                             |
| GO:0016798 | hydrolase activity, acting on glycosyl bonds | F | 59 | 206 | 1.14E-17 | PDE_05931, PDE_05193, PDE_04478, PDE_08094, PDE_01690, PDE_00347, PDE_05998, PDE_09710, PDE_06441, PDE_06439, PDE_02101, PDE_02102, PDE_07531, PDE_04151, PDE_04152, PDE_06306, PDE_04162, PDE_04182, PDE_00507, PDE_00579, PDE_03010, PDE_05210, PDE_09532, PDE_02886, PDE_01750, PDE_09218, PDE_09226, PDE_09278, PDE_09279, PDE_09267, PDE_05445, PDE_00615, PDE_01256, PDE_01261, PDE_00752, PDE_02682, PDE_04859, PDE_06023, PDE_00014, PDE_00015, PDE_00016, PDE_07124, PDE_03573, PDE_02583, PDE_07938, PDE_07945, PDE_06067, PDE_02514, PDE_07928, PDE_06944, PDE_07013, PDE_09988, PDE_09969, PDE_01302, PDE_03542, PDE_02418, PDE_07897, PDE_03572, PDE_00076 |
| GO:0001871 | pattern binding                              | F | 24 | 39  | 2.84E-15 | PDE_08094, PDE_08709, PDE_02101, PDE_02102, PDE_04182, PDE_00507, PDE_05210, PDE_09226, PDE_09278, PDE_05445, PDE_01261, PDE_02682, PDE_06023, PDE_00014, PDE_00015, PDE_00016, PDE_07124, PDE_07945, PDE_06067, PDE_02514, PDE_07928, PDE_09969, PDE_01302, PDE_07897                                                                                                                                                                                                                                                                                                                                                                                                  |
| GO:0030247 | polysaccharide binding                       | F | 24 | 39  | 2.84E-15 | PDE_08094, PDE_08709, PDE_02101, PDE_02102, PDE_04182, PDE_00507, PDE_05210, PDE_09226, PDE_09278, PDE_05445, PDE_01261, PDE_02682, PDE_06023, PDE_00014, PDE_00015, PDE_00016, PDE_07124, PDE_07945, PDE_06067, PDE_02514, PDE_07928, PDE_09969, PDE_01302, PDE_07897                                                                                                                                                                                                                                                                                                                                                                                                  |
| GO:0030246 | carbohydrate binding                         | F | 31 | 68  | 4.26E-15 | PDE_08094, PDE_01540, PDE_05097, PDE_08709, PDE_02101, PDE_02102, PDE_08629, PDE_04182, PDE_00507, PDE_03010, PDE_05210, PDE_09226, PDE_09278, PDE_09279, PDE_05445, PDE_01261, PDE_02682, PDE_06023, PDE_00014, PDE_00015, PDE_00016, PDE_07124, PDE_07945, PDE_06067, PDE_02514, PDE_07928, PDE_06944, PDE_09969, PDE_01302, PDE_07897, PDE_01385                                                                                                                                                                                                                                                                                                                     |
| GO:0000272 | polysaccharide catabolic process             | P | 31 | 73  | 4.68E-14 | PDE_05931, PDE_05193, PDE_04478, PDE_08094, PDE_07259, PDE_05998, PDE_08709, PDE_06441, PDE_06439, PDE_02101, PDE_06306, PDE_04162, PDE_04182, PDE_05210, PDE_02886, PDE_09278, PDE_05445, PDE_00752, PDE_02682, PDE_07674, PDE_07124, PDE_02583, PDE_07938, PDE_07945, PDE_06067, PDE_07928, PDE_07013, PDE_09988, PDE_02418, PDE_07897, PDE_03572                                                                                                                                                                                                                                                                                                                     |
| GO:0016052 | carbohydrate catabolic                       | P | 39 | 122 | 4.45E-13 | PDE_05931, PDE_05193, PDE_04478, PDE_08094, PDE_07330, PDE_07259, PDE_05998, PDE_08709, PDE_06441,                                                                                                                                                                                                                                                                                                                                                                                                                                                                                                                                                                      |

|            |                                            |   |    |     |          |                                                                                                                                                                                                                                                                                                                                                                           |
|------------|--------------------------------------------|---|----|-----|----------|---------------------------------------------------------------------------------------------------------------------------------------------------------------------------------------------------------------------------------------------------------------------------------------------------------------------------------------------------------------------------|
|            | process                                    |   |    |     |          | PDE_06439, PDE_01008, PDE_02101, PDE_06306, PDE_04162, PDE_03036, PDE_04182, PDE_05210, PDE_02886, PDE_09278, PDE_05445, PDE_01256, PDE_09398, PDE_00752, PDE_02682, PDE_07688, PDE_07674, PDE_07124, PDE_02583, PDE_07938, PDE_07945, PDE_06067, PDE_07928, PDE_04588, PDE_07918, PDE_07013, PDE_09988, PDE_02418, PDE_07897, PDE_03572                                  |
| GO:0005976 | polysaccharide metabolic process           | P | 31 | 88  | 1.89E-11 | PDE_05931, PDE_05193, PDE_04478, PDE_08094, PDE_07259, PDE_05998, PDE_08709, PDE_06441, PDE_06439, PDE_02101, PDE_06306, PDE_04162, PDE_04182, PDE_05210, PDE_02886, PDE_09278, PDE_05445, PDE_00752, PDE_02682, PDE_07674, PDE_07124, PDE_02583, PDE_07938, PDE_07945, PDE_06067, PDE_07928, PDE_07013, PDE_09988, PDE_02418, PDE_07897, PDE_03572                       |
| GO:0045493 | xylan catabolic process                    | P | 15 | 20  | 3.50E-11 | PDE_04478, PDE_08094, PDE_08709, PDE_02101, PDE_06306, PDE_05210, PDE_00752, PDE_02682, PDE_07674, PDE_06067, PDE_07013, PDE_09988, PDE_02418, PDE_07897, PDE_03572                                                                                                                                                                                                       |
| GO:0045491 | xylan metabolic process                    | P | 15 | 20  | 3.50E-11 | PDE_04478, PDE_08094, PDE_08709, PDE_02101, PDE_06306, PDE_05210, PDE_00752, PDE_02682, PDE_07674, PDE_06067, PDE_07013, PDE_09988, PDE_02418, PDE_07897, PDE_03572                                                                                                                                                                                                       |
| GO:0010383 | cell wall polysaccharide metabolic process | P | 15 | 21  | 9.89E-11 | PDE_04478, PDE_08094, PDE_08709, PDE_02101, PDE_06306, PDE_05210, PDE_00752, PDE_02682, PDE_07674, PDE_06067, PDE_07013, PDE_09988, PDE_02418, PDE_07897, PDE_03572                                                                                                                                                                                                       |
| GO:0010410 | hemicellulose metabolic process            | P | 15 | 21  | 9.89E-11 | PDE_04478, PDE_08094, PDE_08709, PDE_02101, PDE_06306, PDE_05210, PDE_00752, PDE_02682, PDE_07674, PDE_06067, PDE_07013, PDE_09988, PDE_02418, PDE_07897, PDE_03572                                                                                                                                                                                                       |
| GO:0009057 | macromolecule catabolic process            | P | 33 | 137 | 2.32E-07 | PDE_05931, PDE_05193, PDE_04478, PDE_08094, PDE_07259, PDE_05998, PDE_08709, PDE_06441, PDE_06439, PDE_02101, PDE_06306, PDE_04162, PDE_04182, PDE_00506, PDE_05210, PDE_02886, PDE_09278, PDE_05445, PDE_00752, PDE_02682, PDE_07674, PDE_07124, PDE_02492, PDE_02583, PDE_07938, PDE_07945, PDE_06067, PDE_07928, PDE_07013, PDE_09988, PDE_02418, PDE_07897, PDE_03572 |
| GO:0071554 | cell wall organization or biogenesis       | P | 22 | 67  | 2.87E-07 | PDE_05931, PDE_04478, PDE_08094, PDE_07259, PDE_01529, PDE_08709, PDE_02101, PDE_06306, PDE_04162, PDE_05210, PDE_02886, PDE_00752, PDE_02682, PDE_07674, PDE_02583, PDE_07938, PDE_06067, PDE_07013, PDE_09988, PDE_02418, PDE_07897, PDE_03572                                                                                                                          |
| GO:0044036 | cell wall macromolecule metabolic process  | P | 15 | 34  | 1.12E-06 | PDE_04478, PDE_08094, PDE_08709, PDE_02101, PDE_06306, PDE_05210, PDE_00752, PDE_02682, PDE_07674, PDE_06067, PDE_07013, PDE_09988, PDE_02418, PDE_07897, PDE_03572                                                                                                                                                                                                       |
| GO:0030245 | cellulose catabolic process                | P | 9  | 12  | 2.35E-06 | PDE_05193, PDE_08709, PDE_06441, PDE_06439, PDE_04182, PDE_09278, PDE_05445, PDE_07124, PDE_07945                                                                                                                                                                                                                                                                         |

|            |                              |   |     |      |          |                                                                                                                                                                                                                                                                                                                                                                                                                                                                                                                                                                                                                                                                                                                      |
|------------|------------------------------|---|-----|------|----------|----------------------------------------------------------------------------------------------------------------------------------------------------------------------------------------------------------------------------------------------------------------------------------------------------------------------------------------------------------------------------------------------------------------------------------------------------------------------------------------------------------------------------------------------------------------------------------------------------------------------------------------------------------------------------------------------------------------------|
| GO:0030243 | cellulose metabolic process  | P | 9   | 12   | 2.35E-06 | PDE_05193, PDE_08709, PDE_06441, PDE_06439, PDE_04182, PDE_09278, PDE_05445, PDE_07124, PDE_07945                                                                                                                                                                                                                                                                                                                                                                                                                                                                                                                                                                                                                    |
| GO:0009251 | glucan catabolic process     | P | 9   | 13   | 6.80E-06 | PDE_05193, PDE_08709, PDE_06441, PDE_06439, PDE_04182, PDE_09278, PDE_05445, PDE_07124, PDE_07945                                                                                                                                                                                                                                                                                                                                                                                                                                                                                                                                                                                                                    |
| GO:0008810 | cellulase activity           | F | 9   | 15   | 3.90E-05 | PDE_05193, PDE_06439, PDE_00507, PDE_02886, PDE_09226, PDE_01261, PDE_07124, PDE_07928, PDE_09969                                                                                                                                                                                                                                                                                                                                                                                                                                                                                                                                                                                                                    |
| GO:0009056 | catabolic process            | P | 58  | 391  | 3.90E-05 | PDE_05931, PDE_05193, PDE_04478, PDE_08094, PDE_07342, PDE_07330, PDE_05063, PDE_07259, PDE_03738, PDE_09720, PDE_09719, PDE_05998, PDE_07217, PDE_09704, PDE_08709, PDE_06441, PDE_06439, PDE_01008, PDE_02101, PDE_02947, PDE_01899, PDE_06306, PDE_04162, PDE_03036, PDE_04182, PDE_00506, PDE_05210, PDE_02886, PDE_09278, PDE_08414, PDE_05427, PDE_05445, PDE_01256, PDE_09398, PDE_00752, PDE_02682, PDE_07688, PDE_07674, PDE_07124, PDE_02492, PDE_02583, PDE_02592, PDE_07938, PDE_07945, PDE_06067, PDE_09135, PDE_07928, PDE_04588, PDE_07918, PDE_07013, PDE_09988, PDE_03486, PDE_05806, PDE_08948, PDE_02418, PDE_07897, PDE_08183, PDE_03572                                                         |
| GO:0005198 | structural molecule activity | F | 30  | 149  | 6.78E-05 | PDE_03807, PDE_03827, PDE_05983, PDE_05108, PDE_01695, PDE_05026, PDE_04327, PDE_03780, PDE_08757, PDE_01824, PDE_00406, PDE_01817, PDE_05316, PDE_02916, PDE_03178, PDE_05253, PDE_05203, PDE_00629, PDE_04939, PDE_02793, PDE_02754, PDE_07774, PDE_06150, PDE_02649, PDE_00734, PDE_04897, PDE_03668, PDE_02599, PDE_05652, PDE_00162                                                                                                                                                                                                                                                                                                                                                                             |
| GO:0044042 | glucan metabolic process     | P | 9   | 16   | 7.31E-05 | PDE_05193, PDE_08709, PDE_06441, PDE_06439, PDE_04182, PDE_09278, PDE_05445, PDE_07124, PDE_07945                                                                                                                                                                                                                                                                                                                                                                                                                                                                                                                                                                                                                    |
| GO:0005840 | ribosome                     | C | 31  | 158  | 7.31E-05 | PDE_03807, PDE_05983, PDE_05108, PDE_01695, PDE_05026, PDE_04327, PDE_03780, PDE_08758, PDE_08757, PDE_02153, PDE_01824, PDE_00406, PDE_01817, PDE_05316, PDE_02916, PDE_03178, PDE_05253, PDE_05203, PDE_00629, PDE_04939, PDE_02793, PDE_02754, PDE_07774, PDE_02649, PDE_00734, PDE_04897, PDE_03668, PDE_02599, PDE_00825, PDE_00106, PDE_08174                                                                                                                                                                                                                                                                                                                                                                  |
| GO:0044238 | primary metabolic process    | P | 215 | 2211 | 1.25E-04 | PDE_05175, PDE_03807, PDE_05931, PDE_05194, PDE_05193, PDE_05983, PDE_06679, PDE_05103, PDE_05108, PDE_04478, PDE_00285, PDE_00223, PDE_00222, PDE_08094, PDE_01690, PDE_01695, PDE_02298, PDE_09601, PDE_08070, PDE_02244, PDE_07342, PDE_07330, PDE_08857, PDE_05063, PDE_05070, PDE_05026, PDE_07259, PDE_07279, PDE_04360, PDE_03752, PDE_00398, PDE_03738, PDE_04327, PDE_03780, PDE_01576, PDE_01584, PDE_09720, PDE_09719, PDE_08758, PDE_08757, PDE_07236, PDE_05998, PDE_07217, PDE_01540, PDE_09704, PDE_05097, PDE_09710, PDE_08709, PDE_01824, PDE_06441, PDE_03147, PDE_05389, PDE_00406, PDE_01817, PDE_06439, PDE_01008, PDE_00473, PDE_04220, PDE_05316, PDE_02101, PDE_02102, PDE_09467, PDE_02916, |

|            |                                    |   |     |      |          |                                                                                                                                                                                                                                                                                                                                                                                                                                                                                                                                                                                                                                                                                                                                                                                                                                                                                                                                                                                                                                                                                                                                                                                                                                                                                                                                                                                                                                                                                                                                                                                                                                                                                                                                        |
|------------|------------------------------------|---|-----|------|----------|----------------------------------------------------------------------------------------------------------------------------------------------------------------------------------------------------------------------------------------------------------------------------------------------------------------------------------------------------------------------------------------------------------------------------------------------------------------------------------------------------------------------------------------------------------------------------------------------------------------------------------------------------------------------------------------------------------------------------------------------------------------------------------------------------------------------------------------------------------------------------------------------------------------------------------------------------------------------------------------------------------------------------------------------------------------------------------------------------------------------------------------------------------------------------------------------------------------------------------------------------------------------------------------------------------------------------------------------------------------------------------------------------------------------------------------------------------------------------------------------------------------------------------------------------------------------------------------------------------------------------------------------------------------------------------------------------------------------------------------|
|            |                                    |   |     |      |          | PDE_03178, PDE_06473, PDE_05349, PDE_03192, PDE_02929, PDE_02947, PDE_08629, PDE_07531, PDE_01899, PDE_07580, PDE_01858, PDE_04151, PDE_04152, PDE_06306, PDE_06309, PDE_03014, PDE_04162, PDE_06322, PDE_03036, PDE_04182, PDE_05253, PDE_00506, PDE_00507, PDE_00579, PDE_03916, PDE_03010, PDE_00542, PDE_06359, PDE_05203, PDE_05210, PDE_09532, PDE_02817, PDE_02857, PDE_07448, PDE_02886, PDE_01750, PDE_01714, PDE_09226, PDE_01190, PDE_09278, PDE_09279, PDE_09267, PDE_09260, PDE_00629, PDE_03392, PDE_08437, PDE_03408, PDE_04939, PDE_05427, PDE_07782, PDE_02774, PDE_05445, PDE_07794, PDE_02793, PDE_02754, PDE_00615, PDE_07774, PDE_01256, PDE_07722, PDE_01261, PDE_06117, PDE_06100, PDE_04799, PDE_06146, PDE_09398, PDE_00752, PDE_03241, PDE_03287, PDE_08360, PDE_02682, PDE_07688, PDE_03308, PDE_05565, PDE_07674, PDE_07667, PDE_07668, PDE_02649, PDE_00734, PDE_06179, PDE_04890, PDE_04897, PDE_04828, PDE_04859, PDE_06023, PDE_00014, PDE_00015, PDE_00016, PDE_06805, PDE_07124, PDE_02492, PDE_05727, PDE_08219, PDE_01983, PDE_03573, PDE_03672, PDE_05687, PDE_05694, PDE_01924, PDE_03668, PDE_02549, PDE_08270, PDE_03644, PDE_03617, PDE_02599, PDE_05652, PDE_02583, PDE_02593, PDE_07938, PDE_07933, PDE_07944, PDE_07945, PDE_00816, PDE_04768, PDE_06067, PDE_06771, PDE_02514, PDE_01468, PDE_02509, PDE_09135, PDE_06907, PDE_09131, PDE_06918, PDE_04574, PDE_00987, PDE_09141, PDE_06948, PDE_07928, PDE_06944, PDE_04588, PDE_07918, PDE_06951, PDE_07013, PDE_09988, PDE_03452, PDE_09961, PDE_03486, PDE_09969, PDE_05806, PDE_01302, PDE_03542, PDE_08948, PDE_02418, PDE_07897, PDE_03572, PDE_08111, PDE_03511, PDE_08919, PDE_01385, PDE_00076, PDE_00917, PDE_04626, PDE_07895 |
| GO:0031176 | endo-1,4-beta-xylanase activity    | F | 6   | 7    | 1.50E-04 | PDE_04478, PDE_02101, PDE_05210, PDE_00752, PDE_02682, PDE_02418                                                                                                                                                                                                                                                                                                                                                                                                                                                                                                                                                                                                                                                                                                                                                                                                                                                                                                                                                                                                                                                                                                                                                                                                                                                                                                                                                                                                                                                                                                                                                                                                                                                                       |
| GO:0003735 | structural constituent of ribosome | F | 26  | 128  | 2.80E-04 | PDE_03807, PDE_05983, PDE_05108, PDE_01695, PDE_05026, PDE_04327, PDE_03780, PDE_08757, PDE_01824, PDE_00406, PDE_01817, PDE_05316, PDE_02916, PDE_03178, PDE_05253, PDE_05203, PDE_00629, PDE_04939, PDE_02793, PDE_02754, PDE_07774, PDE_02649, PDE_00734, PDE_04897, PDE_03668, PDE_02599                                                                                                                                                                                                                                                                                                                                                                                                                                                                                                                                                                                                                                                                                                                                                                                                                                                                                                                                                                                                                                                                                                                                                                                                                                                                                                                                                                                                                                           |
| GO:0016787 | hydrolase activity                 | F | 131 | 1219 | 3.92E-04 | PDE_05931, PDE_05194, PDE_05193, PDE_06697, PDE_09688, PDE_05103, PDE_04478, PDE_00285, PDE_00222, PDE_02317, PDE_08094, PDE_01690, PDE_09608, PDE_04504, PDE_08857, PDE_05026, PDE_05002, PDE_07279, PDE_00347, PDE_09720, PDE_04410, PDE_08758, PDE_05998, PDE_07214, PDE_08722, PDE_09704, PDE_09710, PDE_01529, PDE_08709, PDE_06441, PDE_05390, PDE_06439, PDE_03108, PDE_09487, PDE_05316, PDE_02101,                                                                                                                                                                                                                                                                                                                                                                                                                                                                                                                                                                                                                                                                                                                                                                                                                                                                                                                                                                                                                                                                                                                                                                                                                                                                                                                            |

|            |                                                  |   |    |     |          |                                                                                                                                                                                                                                                                                                                                                                                                                                                                                                                                                                                                                                                                                                                                                                                                                                                                                                                                                                                                                                                                                     |
|------------|--------------------------------------------------|---|----|-----|----------|-------------------------------------------------------------------------------------------------------------------------------------------------------------------------------------------------------------------------------------------------------------------------------------------------------------------------------------------------------------------------------------------------------------------------------------------------------------------------------------------------------------------------------------------------------------------------------------------------------------------------------------------------------------------------------------------------------------------------------------------------------------------------------------------------------------------------------------------------------------------------------------------------------------------------------------------------------------------------------------------------------------------------------------------------------------------------------------|
|            |                                                  |   |    |     |          | PDE_02102, PDE_09467, PDE_06473, PDE_03192, PDE_02033, PDE_02947, PDE_02974, PDE_07531, PDE_08616, PDE_01830, PDE_01858, PDE_04151, PDE_04152, PDE_06306, PDE_06309, PDE_03014, PDE_04162, PDE_06322, PDE_03036, PDE_04182, PDE_00506, PDE_00507, PDE_00579, PDE_03010, PDE_05210, PDE_09532, PDE_02817, PDE_02857, PDE_02886, PDE_01750, PDE_09218, PDE_09226, PDE_09278, PDE_09279, PDE_09267, PDE_09260, PDE_03399, PDE_03408, PDE_05427, PDE_04907, PDE_07782, PDE_05445, PDE_02789, PDE_02756, PDE_00615, PDE_01256, PDE_01261, PDE_00752, PDE_03287, PDE_02682, PDE_02635, PDE_06179, PDE_04859, PDE_06023, PDE_00014, PDE_00015, PDE_00016, PDE_09821, PDE_07124, PDE_05727, PDE_08215, PDE_01983, PDE_03573, PDE_03672, PDE_02549, PDE_03617, PDE_02583, PDE_07938, PDE_07933, PDE_07944, PDE_07945, PDE_04768, PDE_06067, PDE_02514, PDE_02504, PDE_02509, PDE_09131, PDE_07928, PDE_06944, PDE_01285, PDE_07013, PDE_09173, PDE_09988, PDE_03486, PDE_09964, PDE_09969, PDE_05806, PDE_01300, PDE_01302, PDE_03542, PDE_02418, PDE_07897, PDE_03572, PDE_00076, PDE_04624 |
| GO:0009067 | aspartate family amino acid biosynthetic process | P | 9  | 19  | 3.94E-04 | PDE_05175, PDE_01576, PDE_07236, PDE_03916, PDE_08437, PDE_04799, PDE_06146, PDE_03308, PDE_05687                                                                                                                                                                                                                                                                                                                                                                                                                                                                                                                                                                                                                                                                                                                                                                                                                                                                                                                                                                                   |
| GO:0044262 | cellular carbohydrate metabolic process          | P | 25 | 131 | 1.28E-03 | PDE_05931, PDE_07330, PDE_07259, PDE_01584, PDE_01540, PDE_05097, PDE_08709, PDE_03147, PDE_01008, PDE_02929, PDE_01899, PDE_04162, PDE_03036, PDE_09398, PDE_07688, PDE_00016, PDE_01924, PDE_02583, PDE_07938, PDE_09135, PDE_04588, PDE_07918, PDE_09988, PDE_07897, PDE_00917                                                                                                                                                                                                                                                                                                                                                                                                                                                                                                                                                                                                                                                                                                                                                                                                   |
| GO:0044444 | cytoplasmic part                                 | C | 70 | 564 | 1.30E-03 | PDE_06615, PDE_03807, PDE_03827, PDE_03828, PDE_05983, PDE_05108, PDE_01695, PDE_09601, PDE_01610, PDE_05026, PDE_04327, PDE_03780, PDE_09720, PDE_08758, PDE_08757, PDE_02153, PDE_07214, PDE_08717, PDE_01824, PDE_00406, PDE_01817, PDE_05316, PDE_09467, PDE_02916, PDE_03178, PDE_04229, PDE_06473, PDE_05349, PDE_08629, PDE_01899, PDE_03014, PDE_05253, PDE_05248, PDE_03916, PDE_03004, PDE_05203, PDE_07448, PDE_06215, PDE_09260, PDE_00629, PDE_08412, PDE_04939, PDE_02793, PDE_02754, PDE_07774, PDE_03251, PDE_02649, PDE_04875, PDE_00734, PDE_04897, PDE_00014, PDE_09059, PDE_03573, PDE_05694, PDE_03668, PDE_02599, PDE_05652, PDE_00825, PDE_04768, PDE_09135, PDE_00132, PDE_00106, PDE_04588, PDE_01285, PDE_00162, PDE_08976, PDE_08980, PDE_08174, PDE_03511, PDE_05751                                                                                                                                                                                                                                                                                    |
| GO:0044106 | cellular amine metabolic process                 | P | 35 | 218 | 0.001322 | PDE_05175, PDE_06679, PDE_00223, PDE_09601, PDE_03738, PDE_01576, PDE_07236, PDE_07217, PDE_05389, PDE_04220, PDE_03916, PDE_00542, PDE_06359, PDE_01714, PDE_03392, PDE_08437, PDE_06117, PDE_06100,                                                                                                                                                                                                                                                                                                                                                                                                                                                                                                                                                                                                                                                                                                                                                                                                                                                                               |

|            |                                               |   |    |     |          |                                                                                                                                                                                                                                                                                                                                                                                                                                                        |
|------------|-----------------------------------------------|---|----|-----|----------|--------------------------------------------------------------------------------------------------------------------------------------------------------------------------------------------------------------------------------------------------------------------------------------------------------------------------------------------------------------------------------------------------------------------------------------------------------|
|            |                                               |   |    |     |          | PDE_04799, PDE_06146, PDE_03241, PDE_08360, PDE_03308, PDE_04890, PDE_04828, PDE_06805, PDE_08219, PDE_05687, PDE_03644, PDE_02593, PDE_00816, PDE_06771, PDE_06907, PDE_09141, PDE_08111                                                                                                                                                                                                                                                              |
| GO:0009066 | aspartate family amino acid metabolic process | P | 9  | 22  | 0.001531 | PDE_05175, PDE_01576, PDE_07236, PDE_03916, PDE_08437, PDE_04799, PDE_06146, PDE_03308, PDE_05687                                                                                                                                                                                                                                                                                                                                                      |
| GO:0006520 | cellular amino acid metabolic process         | P | 34 | 211 | 0.001539 | PDE_05175, PDE_06679, PDE_00223, PDE_09601, PDE_03738, PDE_01576, PDE_07236, PDE_07217, PDE_05389, PDE_04220, PDE_03916, PDE_00542, PDE_06359, PDE_01714, PDE_03392, PDE_08437, PDE_06117, PDE_06100, PDE_04799, PDE_06146, PDE_03241, PDE_08360, PDE_03308, PDE_04890, PDE_04828, PDE_06805, PDE_08219, PDE_05687, PDE_03644, PDE_02593, PDE_00816, PDE_06907, PDE_09141, PDE_08111                                                                   |
| GO:0015935 | small ribosomal subunit                       | C | 7  | 14  | 0.002771 | PDE_05983, PDE_05108, PDE_01695, PDE_03780, PDE_00406, PDE_02754, PDE_02649                                                                                                                                                                                                                                                                                                                                                                            |
| GO:0042180 | cellular ketone metabolic process             | P | 40 | 277 | 0.003734 | PDE_05175, PDE_06679, PDE_00223, PDE_09601, PDE_07330, PDE_03738, PDE_01576, PDE_02153, PDE_07236, PDE_07217, PDE_05389, PDE_01008, PDE_04220, PDE_01899, PDE_03916, PDE_00542, PDE_06359, PDE_01714, PDE_08414, PDE_03392, PDE_08437, PDE_06117, PDE_06100, PDE_04799, PDE_06146, PDE_03241, PDE_08360, PDE_03308, PDE_04890, PDE_04828, PDE_06805, PDE_08219, PDE_05687, PDE_03644, PDE_02593, PDE_00816, PDE_06907, PDE_09141, PDE_03486, PDE_08111 |
| GO:0044275 | cellular carbohydrate catabolic process       | P | 13 | 49  | 0.004184 | PDE_05931, PDE_07330, PDE_07259, PDE_08709, PDE_01008, PDE_04162, PDE_03036, PDE_09398, PDE_07688, PDE_02583, PDE_07938, PDE_04588, PDE_07918                                                                                                                                                                                                                                                                                                          |
| GO:0043436 | oxoacid metabolic process                     | P | 39 | 271 | 0.004686 | PDE_05175, PDE_06679, PDE_00223, PDE_09601, PDE_07330, PDE_03738, PDE_01576, PDE_02153, PDE_07236, PDE_07217, PDE_05389, PDE_01008, PDE_04220, PDE_01899, PDE_03916, PDE_00542, PDE_06359, PDE_01714, PDE_03392, PDE_08437, PDE_06117, PDE_06100, PDE_04799, PDE_06146, PDE_03241, PDE_08360, PDE_03308, PDE_04890, PDE_04828, PDE_06805, PDE_08219, PDE_05687, PDE_03644, PDE_02593, PDE_00816, PDE_06907, PDE_09141, PDE_03486, PDE_08111            |
| GO:0019752 | carboxylic acid metabolic process             | P | 39 | 271 | 0.004686 | PDE_05175, PDE_06679, PDE_00223, PDE_09601, PDE_07330, PDE_03738, PDE_01576, PDE_02153, PDE_07236, PDE_07217, PDE_05389, PDE_01008, PDE_04220, PDE_01899, PDE_03916, PDE_00542, PDE_06359, PDE_01714, PDE_03392, PDE_08437, PDE_06117, PDE_06100, PDE_04799, PDE_06146, PDE_03241, PDE_08360, PDE_03308, PDE_04890, PDE_04828, PDE_06805, PDE_08219, PDE_05687, PDE_03644, PDE_02593, PDE_00816, PDE_06907, PDE_09141, PDE_03486, PDE_08111            |



|            |                                |   |     |      |          |                                                                                                                                                                                                                                                                                                                                                                                                                                                                                                                                                                                                                                                                                                                                                                                                                                                                                                                                                                                                                                                                                                                                                                                                                                                                                                                                                                                                                                                                                                                                                                                                                                                                                                                                                                                                                                                                                                                                                                                                                                                                                                                                                                |
|------------|--------------------------------|---|-----|------|----------|----------------------------------------------------------------------------------------------------------------------------------------------------------------------------------------------------------------------------------------------------------------------------------------------------------------------------------------------------------------------------------------------------------------------------------------------------------------------------------------------------------------------------------------------------------------------------------------------------------------------------------------------------------------------------------------------------------------------------------------------------------------------------------------------------------------------------------------------------------------------------------------------------------------------------------------------------------------------------------------------------------------------------------------------------------------------------------------------------------------------------------------------------------------------------------------------------------------------------------------------------------------------------------------------------------------------------------------------------------------------------------------------------------------------------------------------------------------------------------------------------------------------------------------------------------------------------------------------------------------------------------------------------------------------------------------------------------------------------------------------------------------------------------------------------------------------------------------------------------------------------------------------------------------------------------------------------------------------------------------------------------------------------------------------------------------------------------------------------------------------------------------------------------------|
| GO:0006082 | organic acid metabolic process | P | 39  | 273  | 0.0054   | PDE_05175, PDE_06679, PDE_00223, PDE_09601, PDE_07330, PDE_03738, PDE_01576, PDE_02153, PDE_07236, PDE_07217, PDE_05389, PDE_01008, PDE_04220, PDE_01899, PDE_03916, PDE_00542, PDE_06359, PDE_01714, PDE_03392, PDE_08437, PDE_06117, PDE_06100, PDE_04799, PDE_06146, PDE_03241, PDE_08360, PDE_03308, PDE_04890, PDE_04828, PDE_06805, PDE_08219, PDE_05687, PDE_03644, PDE_02593, PDE_00816, PDE_06907, PDE_09141, PDE_03486, PDE_08111                                                                                                                                                                                                                                                                                                                                                                                                                                                                                                                                                                                                                                                                                                                                                                                                                                                                                                                                                                                                                                                                                                                                                                                                                                                                                                                                                                                                                                                                                                                                                                                                                                                                                                                    |
| GO:0003824 | catalytic activity             | F | 294 | 3382 | 0.005922 | PDE_06615, PDE_05175, PDE_06626, PDE_05183, PDE_05931, PDE_05194, PDE_05193, PDE_05198, PDE_03828, PDE_05121, PDE_05953, PDE_05146, PDE_06679, PDE_05156, PDE_04490, PDE_03857, PDE_06697, PDE_09688, PDE_05103, PDE_04478, PDE_00285, PDE_00223, PDE_00222, PDE_02317, PDE_00251, PDE_08094, PDE_04540, PDE_01690, PDE_02298, PDE_09601, PDE_09604, PDE_08070, PDE_09608, PDE_04504, PDE_00192, PDE_02244, PDE_01610, PDE_07330, PDE_01651, PDE_08857, PDE_05046, PDE_05026, PDE_07259, PDE_05002, PDE_07279, PDE_00398, PDE_03738, PDE_00347, PDE_01576, PDE_01584, PDE_09720, PDE_04410, PDE_08758, PDE_02189, PDE_09735, PDE_09757, PDE_02152, PDE_02153, PDE_07236, PDE_05998, PDE_07217, PDE_07214, PDE_08722, PDE_01540, PDE_09704, PDE_09701, PDE_05097, PDE_09710, PDE_01529, PDE_08709, PDE_06421, PDE_04270, PDE_04273, PDE_06441, PDE_05390, PDE_03147, PDE_05389, PDE_06439, PDE_01008, PDE_03114, PDE_03108, PDE_00449, PDE_00473, PDE_04220, PDE_09487, PDE_05316, PDE_02101, PDE_02102, PDE_09467, PDE_06473, PDE_05349, PDE_03192, PDE_08681, PDE_02929, PDE_02033, PDE_02947, PDE_02010, PDE_08639, PDE_02974, PDE_07531, PDE_02992, PDE_01899, PDE_08616, PDE_01830, PDE_07593, PDE_01858, PDE_04151, PDE_04152, PDE_06306, PDE_06309, PDE_03014, PDE_04162, PDE_06322, PDE_03036, PDE_04168, PDE_04182, PDE_00502, PDE_00506, PDE_05248, PDE_00507, PDE_04193, PDE_03926, PDE_00579, PDE_03910, PDE_03916, PDE_03010, PDE_00542, PDE_06359, PDE_08594, PDE_09593, PDE_03978, PDE_05210, PDE_02828, PDE_09532, PDE_08560, PDE_02817, PDE_02857, PDE_02886, PDE_01750, PDE_06215, PDE_09218, PDE_09223, PDE_09226, PDE_09207, PDE_06231, PDE_09278, PDE_09279, PDE_09267, PDE_09260, PDE_08412, PDE_08414, PDE_03360, PDE_09295, PDE_03399, PDE_08465, PDE_03392, PDE_05506, PDE_08437, PDE_03408, PDE_08484, PDE_05427, PDE_04907, PDE_08476, PDE_07782, PDE_02774, PDE_03437, PDE_03439, PDE_05445, PDE_07794, PDE_03444, PDE_02760, PDE_02789, PDE_02756, PDE_00615, PDE_01256, PDE_06985, PDE_01261, PDE_06117, PDE_06100, PDE_09353, PDE_01044, PDE_04799, PDE_06146, PDE_09398, PDE_00752, PDE_03241, PDE_08313, PDE_03287, PDE_08366, |

|            |                   |   |     |      |          |                                                                                                                                                                                                                                                                                                                                                                                                                                                                                                                                                                                                                                                                                                                                                                                                                                                                                                                                                                                                                                                                                                                                                                                                   |
|------------|-------------------|---|-----|------|----------|---------------------------------------------------------------------------------------------------------------------------------------------------------------------------------------------------------------------------------------------------------------------------------------------------------------------------------------------------------------------------------------------------------------------------------------------------------------------------------------------------------------------------------------------------------------------------------------------------------------------------------------------------------------------------------------------------------------------------------------------------------------------------------------------------------------------------------------------------------------------------------------------------------------------------------------------------------------------------------------------------------------------------------------------------------------------------------------------------------------------------------------------------------------------------------------------------|
|            |                   |   |     |      |          | PDE_08360, PDE_04805, PDE_02682, PDE_07688, PDE_03308, PDE_03312, PDE_07667, PDE_07668, PDE_01109, PDE_02635, PDE_06179, PDE_04061, PDE_04890, PDE_04894, PDE_04828, PDE_04085, PDE_04859, PDE_06023, PDE_00864, PDE_09810, PDE_00013, PDE_00014, PDE_00015, PDE_00016, PDE_09821, PDE_07118, PDE_06805, PDE_07124, PDE_07136, PDE_05727, PDE_08215, PDE_08219, PDE_05737, PDE_09083, PDE_09082, PDE_01983, PDE_03573, PDE_03672, PDE_05687, PDE_05694, PDE_01924, PDE_02549, PDE_08270, PDE_03644, PDE_03617, PDE_02583, PDE_02592, PDE_02593, PDE_07938, PDE_07933, PDE_07944, PDE_07945, PDE_04703, PDE_06751, PDE_04712, PDE_00816, PDE_04768, PDE_06770, PDE_06067, PDE_06771, PDE_02514, PDE_01467, PDE_02504, PDE_02509, PDE_09135, PDE_06907, PDE_09131, PDE_04574, PDE_00987, PDE_09141, PDE_07928, PDE_06944, PDE_04588, PDE_07918, PDE_06951, PDE_01285, PDE_07013, PDE_09984, PDE_09173, PDE_09988, PDE_03452, PDE_03486, PDE_09964, PDE_09969, PDE_05806, PDE_01300, PDE_01302, PDE_03542, PDE_08980, PDE_02418, PDE_07897, PDE_02414, PDE_08183, PDE_03572, PDE_08111, PDE_02452, PDE_08919, PDE_01385, PDE_01380, PDE_00935, PDE_00076, PDE_00917, PDE_04624, PDE_07895, PDE_01324 |
| GO:0006412 | translation       | P | 38  | 266  | 0.006415 | PDE_03807, PDE_05983, PDE_06679, PDE_05108, PDE_01695, PDE_05026, PDE_04360, PDE_03752, PDE_04327, PDE_03780, PDE_09720, PDE_08757, PDE_01824, PDE_05389, PDE_00406, PDE_01817, PDE_05316, PDE_02916, PDE_03178, PDE_05253, PDE_05203, PDE_00629, PDE_04939, PDE_02793, PDE_02754, PDE_07774, PDE_08360, PDE_02649, PDE_00734, PDE_04897, PDE_04828, PDE_06805, PDE_08219, PDE_03668, PDE_02599, PDE_06907, PDE_00987, PDE_03486                                                                                                                                                                                                                                                                                                                                                                                                                                                                                                                                                                                                                                                                                                                                                                  |
| GO:0008152 | metabolic process | P | 300 | 3475 | 0.007788 | PDE_06615, PDE_05175, PDE_06626, PDE_03807, PDE_05183, PDE_05931, PDE_05194, PDE_05193, PDE_05198, PDE_03828, PDE_05121, PDE_05953, PDE_05983, PDE_05146, PDE_06679, PDE_05156, PDE_03857, PDE_09688, PDE_05103, PDE_05108, PDE_04478, PDE_00285, PDE_00223, PDE_00222, PDE_00251, PDE_08094, PDE_04540, PDE_01690, PDE_01695, PDE_02298, PDE_09601, PDE_08070, PDE_04504, PDE_02244, PDE_07342, PDE_01610, PDE_07330, PDE_08857, PDE_05063, PDE_05070, PDE_05046, PDE_05026, PDE_07259, PDE_07279, PDE_04360, PDE_03752, PDE_00398, PDE_03738, PDE_04327, PDE_03780, PDE_00347, PDE_01576, PDE_01584, PDE_09720, PDE_09719, PDE_08758, PDE_08757, PDE_02189, PDE_09735, PDE_09757, PDE_02152, PDE_02153, PDE_07236, PDE_05998, PDE_07217, PDE_01540, PDE_09704, PDE_09701, PDE_05097, PDE_09710, PDE_08709, PDE_04270, PDE_04273, PDE_00412, PDE_01824, PDE_06441, PDE_05390, PDE_03147, PDE_05389, PDE_00406, PDE_01817,                                                                                                                                                                                                                                                                        |

|            |                          |   |   |    |        |                                                                                                                                                                                                                                                                                                                                                                                                                                                                                                                                                                                                                                                                                                                                                                                                                                                                                                                                                                                                                                                                                                                                                                                                                                                                                                                                                                                                                                                                                                                                                                                                                                                                                                                                                                                                                                                                                                                                                                                                                                                                                                                                                                                                                                                                                                                                                                                                                                                                                                                |
|------------|--------------------------|---|---|----|--------|----------------------------------------------------------------------------------------------------------------------------------------------------------------------------------------------------------------------------------------------------------------------------------------------------------------------------------------------------------------------------------------------------------------------------------------------------------------------------------------------------------------------------------------------------------------------------------------------------------------------------------------------------------------------------------------------------------------------------------------------------------------------------------------------------------------------------------------------------------------------------------------------------------------------------------------------------------------------------------------------------------------------------------------------------------------------------------------------------------------------------------------------------------------------------------------------------------------------------------------------------------------------------------------------------------------------------------------------------------------------------------------------------------------------------------------------------------------------------------------------------------------------------------------------------------------------------------------------------------------------------------------------------------------------------------------------------------------------------------------------------------------------------------------------------------------------------------------------------------------------------------------------------------------------------------------------------------------------------------------------------------------------------------------------------------------------------------------------------------------------------------------------------------------------------------------------------------------------------------------------------------------------------------------------------------------------------------------------------------------------------------------------------------------------------------------------------------------------------------------------------------------|
|            |                          |   |   |    |        | <p>PDE_06439, PDE_01008, PDE_03114, PDE_00449, PDE_00473, PDE_04220, PDE_05316, PDE_02101, PDE_02102, PDE_09467, PDE_02916, PDE_03178, PDE_06473, PDE_05349, PDE_03192, PDE_08681, PDE_02929, PDE_02947, PDE_08639, PDE_08629, PDE_02974, PDE_07531, PDE_01899, PDE_08616, PDE_07593, PDE_07580, PDE_01858, PDE_04151, PDE_04152, PDE_06306, PDE_06309, PDE_03014, PDE_04162, PDE_06322, PDE_03036, PDE_04182, PDE_05253, PDE_00502, PDE_00506, PDE_05248, PDE_00507, PDE_04193, PDE_03926, PDE_00579, PDE_03916, PDE_03010, PDE_00542, PDE_06359, PDE_08594, PDE_09593, PDE_05203, PDE_03978, PDE_05210, PDE_02828, PDE_09532, PDE_08560, PDE_02817, PDE_02857, PDE_07448, PDE_02886, PDE_01750, PDE_01714, PDE_06215, PDE_09218, PDE_09223, PDE_09226, PDE_09207, PDE_01190, PDE_09278, PDE_09279, PDE_09267, PDE_09260, PDE_00629, PDE_08412, PDE_08414, PDE_03360, PDE_09295, PDE_08465, PDE_03392, PDE_08437, PDE_03408, PDE_04939, PDE_08484, PDE_05427, PDE_08476, PDE_07782, PDE_02774, PDE_03439, PDE_05445, PDE_07794, PDE_03444, PDE_02793, PDE_02754, PDE_00615, PDE_07774, PDE_01256, PDE_07722, PDE_01261, PDE_06117, PDE_06100, PDE_01044, PDE_04799, PDE_06146, PDE_09398, PDE_00752, PDE_03241, PDE_08313, PDE_03287, PDE_08366, PDE_08360, PDE_04805, PDE_02682, PDE_07688, PDE_03308, PDE_05565, PDE_03312, PDE_07674, PDE_07667, PDE_07668, PDE_02649, PDE_01109, PDE_00734, PDE_06179, PDE_04061, PDE_04890, PDE_04894, PDE_04897, PDE_04828, PDE_04085, PDE_04859, PDE_06023, PDE_09810, PDE_00013, PDE_00014, PDE_00015, PDE_00016, PDE_06805, PDE_07124, PDE_07136, PDE_02492, PDE_05727, PDE_08215, PDE_08219, PDE_05737, PDE_09083, PDE_09082, PDE_01983, PDE_03573, PDE_03672, PDE_05687, PDE_05694, PDE_01924, PDE_03668, PDE_02549, PDE_08270, PDE_03644, PDE_03617, PDE_02599, PDE_05652, PDE_02583, PDE_02592, PDE_02593, PDE_07938, PDE_07933, PDE_07944, PDE_07945, PDE_04703, PDE_06751, PDE_04712, PDE_00816, PDE_04768, PDE_06770, PDE_06067, PDE_06771, PDE_02514, PDE_01468, PDE_02504, PDE_02509, PDE_09135, PDE_06907, PDE_09131, PDE_06918, PDE_04574, PDE_00987, PDE_09141, PDE_06948, PDE_07928, PDE_06944, PDE_04588, PDE_07918, PDE_06951, PDE_07013, PDE_09984, PDE_09988, PDE_03452, PDE_09961, PDE_03486, PDE_09969, PDE_05806, PDE_01302, PDE_03542, PDE_08980, PDE_08948, PDE_02418, PDE_07897, PDE_08183, PDE_03572, PDE_08111, PDE_02452, PDE_03511, PDE_08919, PDE_01385, PDE_01380, PDE_00933, PDE_00076, PDE_00917, PDE_04626, PDE_07895, PDE_01324</p> |
| GO:0045490 | pectin catabolic process | P | 6 | 12 | 0.0085 | PDE_05931, PDE_07259, PDE_08709, PDE_04162, PDE_02583, PDE_07938                                                                                                                                                                                                                                                                                                                                                                                                                                                                                                                                                                                                                                                                                                                                                                                                                                                                                                                                                                                                                                                                                                                                                                                                                                                                                                                                                                                                                                                                                                                                                                                                                                                                                                                                                                                                                                                                                                                                                                                                                                                                                                                                                                                                                                                                                                                                                                                                                                               |

|            |                                                         |   |    |     |          |                                                                                                                                                                                                                                                                                                                                                                                                                                             |
|------------|---------------------------------------------------------|---|----|-----|----------|---------------------------------------------------------------------------------------------------------------------------------------------------------------------------------------------------------------------------------------------------------------------------------------------------------------------------------------------------------------------------------------------------------------------------------------------|
| GO:0045488 | pectin metabolic process                                | P | 6  | 12  | 0.0085   | PDE_05931, PDE_07259, PDE_08709, PDE_04162, PDE_02583, PDE_07938                                                                                                                                                                                                                                                                                                                                                                            |
| GO:0030529 | ribonucleoprotein complex                               | C | 35 | 242 | 0.00881  | PDE_03807, PDE_05983, PDE_05108, PDE_01695, PDE_02298, PDE_08855, PDE_05026, PDE_04327, PDE_03780, PDE_08758, PDE_08757, PDE_02153, PDE_01824, PDE_00406, PDE_01817, PDE_05316, PDE_02916, PDE_03178, PDE_05253, PDE_05203, PDE_09553, PDE_00629, PDE_03408, PDE_04939, PDE_02793, PDE_02754, PDE_07774, PDE_02649, PDE_00734, PDE_04897, PDE_03668, PDE_02599, PDE_00825, PDE_00106, PDE_08174                                             |
| GO:0009308 | amine metabolic process                                 | P | 35 | 243 | 0.009292 | PDE_05175, PDE_06679, PDE_00223, PDE_09601, PDE_03738, PDE_01576, PDE_07236, PDE_07217, PDE_05389, PDE_04220, PDE_03916, PDE_00542, PDE_06359, PDE_01714, PDE_03392, PDE_08437, PDE_06117, PDE_06100, PDE_04799, PDE_06146, PDE_03241, PDE_08360, PDE_03308, PDE_04890, PDE_04828, PDE_06805, PDE_08219, PDE_05687, PDE_03644, PDE_02593, PDE_00816, PDE_06771, PDE_06907, PDE_09141, PDE_08111                                             |
| GO:0071840 | cellular component organization or biogenesis           | P | 39 | 282 | 0.009292 | PDE_05931, PDE_05147, PDE_04478, PDE_00222, PDE_02317, PDE_08094, PDE_02298, PDE_07259, PDE_00362, PDE_09704, PDE_01529, PDE_08709, PDE_02101, PDE_06306, PDE_04162, PDE_05210, PDE_02886, PDE_00752, PDE_02682, PDE_07674, PDE_00898, PDE_00014, PDE_03573, PDE_02583, PDE_07938, PDE_06067, PDE_02509, PDE_00132, PDE_07013, PDE_09988, PDE_03486, PDE_09966, PDE_02418, PDE_07897, PDE_03572, PDE_08174, PDE_08919, PDE_07819, PDE_07895 |
| GO:0005996 | monosaccharide metabolic process                        | P | 15 | 69  | 0.010271 | PDE_07330, PDE_01540, PDE_05097, PDE_03147, PDE_01008, PDE_02929, PDE_03036, PDE_09398, PDE_07688, PDE_00016, PDE_01924, PDE_04588, PDE_07918, PDE_09988, PDE_07897                                                                                                                                                                                                                                                                         |
| GO:0016837 | carbon-oxygen lyase activity, acting on polysaccharides | F | 4  | 5   | 0.010396 | PDE_05931, PDE_07259, PDE_01467, PDE_01385                                                                                                                                                                                                                                                                                                                                                                                                  |
| GO:0044247 | cellular polysaccharide catabolic process               | P | 6  | 13  | 0.013113 | PDE_05931, PDE_07259, PDE_08709, PDE_04162, PDE_02583, PDE_07938                                                                                                                                                                                                                                                                                                                                                                            |
| GO:0000097 | sulfur amino acid biosynthetic process                  | P | 7  | 18  | 0.013486 | PDE_05175, PDE_01576, PDE_07236, PDE_04220, PDE_01714, PDE_04799, PDE_05687                                                                                                                                                                                                                                                                                                                                                                 |
| GO:0016162 | cellulose 1,4-beta-cellobiosidase activity              | F | 3  | 3   | 0.027912 | PDE_05445, PDE_07124, PDE_07945                                                                                                                                                                                                                                                                                                                                                                                                             |
| GO:0043228 | non-membrane-bounded                                    | C | 40 | 310 | 0.02951  | PDE_03807, PDE_05983, PDE_05147, PDE_05108, PDE_02317, PDE_01695, PDE_02298, PDE_05026, PDE_04327,                                                                                                                                                                                                                                                                                                                                          |

|            |                                              |   |    |     |          |                                                                                                                                                                                                                                                                                                                                                                                                                                                                                                                                                                                                                                                                                                                                                                                                                                                         |
|------------|----------------------------------------------|---|----|-----|----------|---------------------------------------------------------------------------------------------------------------------------------------------------------------------------------------------------------------------------------------------------------------------------------------------------------------------------------------------------------------------------------------------------------------------------------------------------------------------------------------------------------------------------------------------------------------------------------------------------------------------------------------------------------------------------------------------------------------------------------------------------------------------------------------------------------------------------------------------------------|
|            | organelle                                    |   |    |     |          | PDE_03780, PDE_08758, PDE_08757, PDE_02153, PDE_09704, PDE_01824, PDE_00406, PDE_01817, PDE_05316, PDE_02916, PDE_03178, PDE_05253, PDE_05203, PDE_00629, PDE_04939, PDE_02793, PDE_02754, PDE_07774, PDE_02649, PDE_00734, PDE_04897, PDE_03668, PDE_02599, PDE_00825, PDE_02509, PDE_00132, PDE_00106, PDE_03486, PDE_09966, PDE_08174, PDE_07819                                                                                                                                                                                                                                                                                                                                                                                                                                                                                                     |
| GO:0043232 | intracellular non-membrane-bounded organelle | C | 40 | 310 | 0.02951  | PDE_03807, PDE_05983, PDE_05147, PDE_05108, PDE_02317, PDE_01695, PDE_02298, PDE_05026, PDE_04327, PDE_03780, PDE_08758, PDE_08757, PDE_02153, PDE_09704, PDE_01824, PDE_00406, PDE_01817, PDE_05316, PDE_02916, PDE_03178, PDE_05253, PDE_05203, PDE_00629, PDE_04939, PDE_02793, PDE_02754, PDE_07774, PDE_02649, PDE_00734, PDE_04897, PDE_03668, PDE_02599, PDE_00825, PDE_02509, PDE_00132, PDE_00106, PDE_03486, PDE_09966, PDE_08174, PDE_07819                                                                                                                                                                                                                                                                                                                                                                                                  |
| GO:0044281 | small molecule metabolic process             | P | 75 | 692 | 0.033602 | PDE_05175, PDE_06626, PDE_05146, PDE_06679, PDE_03857, PDE_00223, PDE_09601, PDE_07330, PDE_05063, PDE_07279, PDE_03738, PDE_01576, PDE_09720, PDE_09719, PDE_02153, PDE_07236, PDE_07217, PDE_01540, PDE_09704, PDE_09701, PDE_05097, PDE_04270, PDE_03147, PDE_05389, PDE_01008, PDE_00473, PDE_04220, PDE_02929, PDE_01899, PDE_03014, PDE_03036, PDE_03916, PDE_00542, PDE_06359, PDE_09593, PDE_01714, PDE_06215, PDE_09207, PDE_08414, PDE_03392, PDE_08437, PDE_05427, PDE_06117, PDE_06100, PDE_04799, PDE_06146, PDE_09398, PDE_03241, PDE_08360, PDE_07688, PDE_03308, PDE_04890, PDE_04828, PDE_00016, PDE_06805, PDE_08219, PDE_05687, PDE_01924, PDE_03644, PDE_02593, PDE_07944, PDE_00816, PDE_06771, PDE_06907, PDE_09141, PDE_04588, PDE_07918, PDE_09988, PDE_03486, PDE_05806, PDE_08948, PDE_07897, PDE_08111, PDE_03511, PDE_07895 |
| GO:0008652 | cellular amino acid biosynthetic process     | P | 18 | 103 | 0.036263 | PDE_05175, PDE_00223, PDE_09601, PDE_01576, PDE_07236, PDE_04220, PDE_03916, PDE_00542, PDE_01714, PDE_08437, PDE_06100, PDE_04799, PDE_06146, PDE_03308, PDE_04890, PDE_05687, PDE_03644, PDE_00816                                                                                                                                                                                                                                                                                                                                                                                                                                                                                                                                                                                                                                                    |
| GO:0005737 | cytoplasm                                    | C | 91 | 882 | 0.041863 | PDE_06615, PDE_03807, PDE_03827, PDE_03828, PDE_05983, PDE_06679, PDE_05108, PDE_00223, PDE_01695, PDE_09601, PDE_01610, PDE_05070, PDE_05026, PDE_03752, PDE_04327, PDE_03780, PDE_01576, PDE_09720, PDE_08758, PDE_08757, PDE_02153, PDE_07217, PDE_07214, PDE_08717, PDE_01824, PDE_05389, PDE_00406, PDE_01817, PDE_00473, PDE_05316, PDE_09467, PDE_02916, PDE_03178, PDE_04229, PDE_06473, PDE_05349, PDE_08629, PDE_01899, PDE_01858, PDE_03014, PDE_05253, PDE_05248, PDE_03916, PDE_03004, PDE_00542, PDE_05203, PDE_02857, PDE_07448, PDE_06215, PDE_09260, PDE_00629, PDE_08412, PDE_04939, PDE_02793,                                                                                                                                                                                                                                       |

|                                                     |                                     |   |    |     |          |                                                                                                                                                                                                                                                                                                                                                                                                                                                                                                                                                                                                                                        |
|-----------------------------------------------------|-------------------------------------|---|----|-----|----------|----------------------------------------------------------------------------------------------------------------------------------------------------------------------------------------------------------------------------------------------------------------------------------------------------------------------------------------------------------------------------------------------------------------------------------------------------------------------------------------------------------------------------------------------------------------------------------------------------------------------------------------|
|                                                     |                                     |   |    |     |          | PDE_02754, PDE_07774, PDE_09398, PDE_03251, PDE_08360, PDE_02649, PDE_04875, PDE_00734, PDE_04897, PDE_04828, PDE_09810, PDE_00014, PDE_06805, PDE_02492, PDE_08219, PDE_09059, PDE_03573, PDE_05694, PDE_03668, PDE_02599, PDE_05652, PDE_00816, PDE_00825, PDE_04768, PDE_09135, PDE_06907, PDE_00132, PDE_00106, PDE_04588, PDE_01285, PDE_00162, PDE_08976, PDE_08980, PDE_08174, PDE_03511, PDE_05751, PDE_04624                                                                                                                                                                                                                  |
| GO:0019321                                          | pentose metabolic process           | P | 5  | 11  | 0.043663 | PDE_02929, PDE_00016, PDE_07918, PDE_09988, PDE_07897                                                                                                                                                                                                                                                                                                                                                                                                                                                                                                                                                                                  |
| GO:0009086                                          | methionine biosynthetic process     | P | 5  | 11  | 0.043663 | PDE_05175, PDE_01576, PDE_07236, PDE_04799, PDE_05687                                                                                                                                                                                                                                                                                                                                                                                                                                                                                                                                                                                  |
| GO:0015926                                          | glucosidase activity                | F | 8  | 28  | 0.045247 | PDE_09710, PDE_06441, PDE_04151, PDE_04152, PDE_00579, PDE_03010, PDE_02583, PDE_03542                                                                                                                                                                                                                                                                                                                                                                                                                                                                                                                                                 |
| GO:0000096                                          | sulfur amino acid metabolic process | P | 7  | 22  | 0.046771 | PDE_05175, PDE_01576, PDE_07236, PDE_04220, PDE_01714, PDE_04799, PDE_05687                                                                                                                                                                                                                                                                                                                                                                                                                                                                                                                                                            |
| <b>Down-regulated in JU-A10-T relative to 114-2</b> |                                     |   |    |     |          |                                                                                                                                                                                                                                                                                                                                                                                                                                                                                                                                                                                                                                        |
| GO:0005506                                          | iron ion binding                    | F | 56 | 166 | 2.01E-05 | PDE_05132, PDE_00298, PDE_05907, PDE_04530, PDE_08098, PDE_04527, PDE_01689, PDE_08009, PDE_05886, PDE_05885, PDE_08821, PDE_06706, PDE_02205, PDE_00370, PDE_03787, PDE_09748, PDE_02139, PDE_09762, PDE_07206, PDE_07207, PDE_01023, PDE_04265, PDE_04228, PDE_02071, PDE_08660, PDE_03956, PDE_00525, PDE_05239, PDE_06327, PDE_02802, PDE_07439, PDE_10010, PDE_10004, PDE_10003, PDE_10008, PDE_09230, PDE_04936, PDE_06295, PDE_01216, PDE_06972, PDE_01064, PDE_01070, PDE_05566, PDE_04016, PDE_04015, PDE_04025, PDE_01395, PDE_05708, PDE_01418, PDE_00811, PDE_02386, PDE_03490, PDE_08962, PDE_02454, PDE_02461, PDE_04632 |
| GO:0020037                                          | heme binding                        | F | 43 | 115 | 2.01E-05 | PDE_05907, PDE_04530, PDE_08098, PDE_01689, PDE_08009, PDE_05886, PDE_05885, PDE_08821, PDE_06706, PDE_02205, PDE_00370, PDE_09748, PDE_09762, PDE_07206, PDE_07207, PDE_04228, PDE_02071, PDE_08660, PDE_03956, PDE_00525, PDE_06327, PDE_02802, PDE_10010, PDE_10004, PDE_10003, PDE_10008, PDE_09230, PDE_04936, PDE_01216, PDE_06972, PDE_01064, PDE_01070, PDE_05566, PDE_04016, PDE_04015, PDE_04025, PDE_01395, PDE_05708, PDE_01418, PDE_00811, PDE_08962, PDE_02454, PDE_02461                                                                                                                                                |
| GO:0046906                                          | tetrapyrrole binding                | F | 43 | 116 | 2.01E-05 | PDE_05907, PDE_04530, PDE_08098, PDE_01689, PDE_08009, PDE_05886, PDE_05885, PDE_08821, PDE_06706, PDE_02205, PDE_00370, PDE_09748, PDE_09762, PDE_07206, PDE_07207, PDE_04228, PDE_02071, PDE_08660,                                                                                                                                                                                                                                                                                                                                                                                                                                  |

|            |                         |   |     |     |          |                                                                                                                                                                                                                                                                                                                                                                                                                                                                                                                                                                                                                                                                                                                                                                                                                                                                                                                                                                                                                                                                                                                                                                                                                                                                                                                                                                                                                                                                                                                                                                                                                                                                                                                                                                                                                                                                                                  |
|------------|-------------------------|---|-----|-----|----------|--------------------------------------------------------------------------------------------------------------------------------------------------------------------------------------------------------------------------------------------------------------------------------------------------------------------------------------------------------------------------------------------------------------------------------------------------------------------------------------------------------------------------------------------------------------------------------------------------------------------------------------------------------------------------------------------------------------------------------------------------------------------------------------------------------------------------------------------------------------------------------------------------------------------------------------------------------------------------------------------------------------------------------------------------------------------------------------------------------------------------------------------------------------------------------------------------------------------------------------------------------------------------------------------------------------------------------------------------------------------------------------------------------------------------------------------------------------------------------------------------------------------------------------------------------------------------------------------------------------------------------------------------------------------------------------------------------------------------------------------------------------------------------------------------------------------------------------------------------------------------------------------------|
|            |                         |   |     |     |          | PDE_03956, PDE_00525, PDE_06327, PDE_02802, PDE_10010, PDE_10004, PDE_10003, PDE_10008, PDE_09230, PDE_04936, PDE_01216, PDE_06972, PDE_01064, PDE_01070, PDE_05566, PDE_04016, PDE_04015, PDE_04025, PDE_01395, PDE_05708, PDE_01418, PDE_00811, PDE_08962, PDE_02454, PDE_02461                                                                                                                                                                                                                                                                                                                                                                                                                                                                                                                                                                                                                                                                                                                                                                                                                                                                                                                                                                                                                                                                                                                                                                                                                                                                                                                                                                                                                                                                                                                                                                                                                |
| GO:0055114 | oxidation reduction     | P | 166 | 767 | 0.003193 | PDE_05158, PDE_05132, PDE_05973, PDE_04495, PDE_02350, PDE_09681, PDE_00298, PDE_09693, PDE_03899, PDE_05907, PDE_00249, PDE_04530, PDE_08885, PDE_08098, PDE_04527, PDE_01689, PDE_09616, PDE_08009, PDE_05886, PDE_08814, PDE_08806, PDE_08821, PDE_08859, PDE_08042, PDE_06706, PDE_08847, PDE_08849, PDE_07286, PDE_07272, PDE_07278, PDE_02205, PDE_04366, PDE_06586, PDE_04376, PDE_00370, PDE_03787, PDE_02172, PDE_09748, PDE_09770, PDE_02139, PDE_09761, PDE_02128, PDE_09762, PDE_07232, PDE_07234, PDE_07226, PDE_07206, PDE_07208, PDE_07207, PDE_05363, PDE_01023, PDE_06414, PDE_03105, PDE_04218, PDE_04216, PDE_09498, PDE_09492, PDE_04265, PDE_04264, PDE_04228, PDE_06474, PDE_09453, PDE_02071, PDE_08630, PDE_08660, PDE_03956, PDE_00525, PDE_05239, PDE_03901, PDE_06396, PDE_03064, PDE_03073, PDE_06327, PDE_03974, PDE_03975, PDE_07439, PDE_01780, PDE_02881, PDE_10010, PDE_10004, PDE_10003, PDE_10008, PDE_09229, PDE_09230, PDE_01188, PDE_09239, PDE_00643, PDE_00646, PDE_08495, PDE_04936, PDE_06295, PDE_01220, PDE_01216, PDE_01217, PDE_06972, PDE_01238, PDE_01064, PDE_01070, PDE_01068, PDE_09342, PDE_00787, PDE_09367, PDE_01080, PDE_09380, PDE_03254, PDE_03282, PDE_05550, PDE_05548, PDE_07692, PDE_04020, PDE_05566, PDE_04016, PDE_04015, PDE_03316, PDE_04028, PDE_04025, PDE_02605, PDE_06017, PDE_09027, PDE_01395, PDE_06831, PDE_09047, PDE_09870, PDE_05708, PDE_01406, PDE_05675, PDE_08297, PDE_01413, PDE_01418, PDE_01482, PDE_00809, PDE_07956, PDE_07957, PDE_07139, PDE_06745, PDE_00811, PDE_06052, PDE_01451, PDE_09933, PDE_06915, PDE_00170, PDE_06955, PDE_01278, PDE_06939, PDE_02393, PDE_02386, PDE_02372, PDE_02368, PDE_02379, PDE_03468, PDE_03483, PDE_08966, PDE_08156, PDE_08906, PDE_08904, PDE_02461, PDE_00923, PDE_01384, PDE_01374, PDE_04605, PDE_00966, PDE_04629, PDE_04628, PDE_00968, PDE_04632, PDE_07852 |
| GO:0016491 | oxidoreductase activity | F | 173 | 816 | 0.005864 | PDE_05158, PDE_05943, PDE_05132, PDE_05973, PDE_04495, PDE_02350, PDE_09681, PDE_00298, PDE_09691, PDE_09693, PDE_03899, PDE_05907, PDE_00249, PDE_04530, PDE_08098, PDE_04527, PDE_01689, PDE_09616, PDE_08009, PDE_05886, PDE_05885, PDE_08814, PDE_08806, PDE_08821, PDE_08859, PDE_08042, PDE_06706, PDE_08847, PDE_08849, PDE_07286, PDE_07272, PDE_02205, PDE_04366, PDE_06586, PDE_04376, PDE_00370,                                                                                                                                                                                                                                                                                                                                                                                                                                                                                                                                                                                                                                                                                                                                                                                                                                                                                                                                                                                                                                                                                                                                                                                                                                                                                                                                                                                                                                                                                      |

|            |                           |   |    |     |          |                                                                                                                                                                                                                                                                                                                                                                                                                                                                                                                                                                                                                                                                                                                                                                                                                                                                                                                                                                                                                                                                                                                                                                                                                                                                                                                                                                                                                                                                                                                                                                          |
|------------|---------------------------|---|----|-----|----------|--------------------------------------------------------------------------------------------------------------------------------------------------------------------------------------------------------------------------------------------------------------------------------------------------------------------------------------------------------------------------------------------------------------------------------------------------------------------------------------------------------------------------------------------------------------------------------------------------------------------------------------------------------------------------------------------------------------------------------------------------------------------------------------------------------------------------------------------------------------------------------------------------------------------------------------------------------------------------------------------------------------------------------------------------------------------------------------------------------------------------------------------------------------------------------------------------------------------------------------------------------------------------------------------------------------------------------------------------------------------------------------------------------------------------------------------------------------------------------------------------------------------------------------------------------------------------|
|            |                           |   |    |     |          | <p>PDE_03787, PDE_09714, PDE_02172, PDE_09748, PDE_09770, PDE_02139, PDE_09761, PDE_02128, PDE_09762, PDE_09758, PDE_07246, PDE_07232, PDE_07226, PDE_07206, PDE_07208, PDE_07207, PDE_01808, PDE_05363, PDE_01023, PDE_06412, PDE_04277, PDE_03105, PDE_04218, PDE_04216, PDE_09492, PDE_04265, PDE_04264, PDE_04228, PDE_06474, PDE_09453, PDE_02071, PDE_08630, PDE_08660, PDE_01701, PDE_03956, PDE_00525, PDE_05239, PDE_03901, PDE_06396, PDE_03064, PDE_03073, PDE_06327, PDE_03975, PDE_07439, PDE_01780, PDE_10004, PDE_10003, PDE_10002, PDE_10008, PDE_09229, PDE_09230, PDE_01188, PDE_09239, PDE_00643, PDE_00646, PDE_05500, PDE_08495, PDE_04936, PDE_06295, PDE_01220, PDE_01216, PDE_01217, PDE_06972, PDE_01238, PDE_01064, PDE_01070, PDE_01068, PDE_00799, PDE_09342, PDE_00787, PDE_09367, PDE_01080, PDE_09380, PDE_03254, PDE_03282, PDE_05550, PDE_05548, PDE_07692, PDE_04020, PDE_05566, PDE_04016, PDE_03316, PDE_04028, PDE_04025, PDE_00709, PDE_02605, PDE_06017, PDE_09027, PDE_06042, PDE_01395, PDE_06831, PDE_09047, PDE_09870, PDE_05708, PDE_01406, PDE_05675, PDE_01413, PDE_01418, PDE_01482, PDE_00809, PDE_07956, PDE_07957, PDE_07139, PDE_06745, PDE_01451, PDE_09933, PDE_06915, PDE_00111, PDE_00170, PDE_06955, PDE_01278, PDE_06939, PDE_02393, PDE_02386, PDE_09999, PDE_02372, PDE_02368, PDE_02379, PDE_03468, PDE_09194, PDE_08966, PDE_08156, PDE_02419, PDE_02454, PDE_08904, PDE_02461, PDE_01390, PDE_00923, PDE_01384, PDE_01374, PDE_04605, PDE_00966, PDE_04629, PDE_04628, PDE_00968, PDE_04632, PDE_07852</p> |
| GO:0009055 | electron carrier activity | F | 37 | 126 | 0.049181 | <p>PDE_05132, PDE_00298, PDE_04530, PDE_01689, PDE_05886, PDE_08821, PDE_06706, PDE_08847, PDE_09714, PDE_09748, PDE_07206, PDE_07207, PDE_01808, PDE_04228, PDE_08660, PDE_03956, PDE_06327, PDE_09546, PDE_10010, PDE_10004, PDE_10003, PDE_10008, PDE_09230, PDE_04936, PDE_01216, PDE_06972, PDE_01064, PDE_01070, PDE_01068, PDE_04016, PDE_04015, PDE_04025, PDE_01395, PDE_01418, PDE_00811, PDE_02461, PDE_04632</p>                                                                                                                                                                                                                                                                                                                                                                                                                                                                                                                                                                                                                                                                                                                                                                                                                                                                                                                                                                                                                                                                                                                                             |



**Table S10.** Transcription levels of genes involved in pentose metabolism, central metabolism and intracellular cellodextrin metabolism.

| Gene ID                          |           | Function prediction                      | Transcription level<br>(tags per million) |          | Change <sup>a</sup> |
|----------------------------------|-----------|------------------------------------------|-------------------------------------------|----------|---------------------|
| 114-2                            | JU-A10-T  |                                          | 114-2                                     | JU-A10-T |                     |
| <b>D-xylose metabolism</b>       |           |                                          |                                           |          |                     |
| PDE_02929                        | PDT_03086 | aldose reductase                         | 29.24                                     | 94.9     | Up                  |
| PDE_05826                        | PDT_06059 | xylitol dehydrogenase                    | 68.68                                     | 134.23   |                     |
| PDE_09158                        | PDT_09456 | D-xylulose kinase                        | 15.98                                     | 36.03    |                     |
| <b>L-arabinose metabolism</b>    |           |                                          |                                           |          |                     |
| PDE_00398                        | PDT_00406 | L-arabinitol 4-dehydrogenase             | 52.7                                      | 161.19   | Up                  |
| PDE_07136                        | PDT_07390 | L-xylulose reductase                     | 36.38                                     | 73.99    | Up                  |
| <b>Pentose phosphate pathway</b> |           |                                          |                                           |          |                     |
| PDE_01924                        | PDT_02012 | glucose-6-phosphate 1-dehydrogenase      | 25.16                                     | 224.18   | Up                  |
| PDE_03036                        | PDT_03206 | 6-phosphogluconolactonase                | 84.32                                     | 207.67   | Up                  |
| PDE_08859                        | PDT_09150 | 6-phosphogluconate dehydrogenase         | 484.84                                    | 118.55   | Down                |
| PDE_08816                        | PDT_09107 | 6-phosphogluconate dehydrogenase         | 16.32                                     | 0.55     |                     |
| PDE_06557                        | PDT_06792 | ribulose-phosphate 3-epimerase           | 73.1                                      | 69.04    |                     |
| PDE_07918                        | PDT_08186 | ribose 5-phosphate isomerase A           | 39.1                                      | 94.07    | Up                  |
| PDE_03075                        | PDT_03245 | ribose 5-phosphate isomerase B           | 0                                         | 0.83     |                     |
| PDE_00194                        | PDT_00198 | transketolase                            | 127.84                                    | 236.55   |                     |
| PDE_04193                        | PDT_04395 | transketolase                            | 130.9                                     | 287.17   | Up                  |
| PDE_09398                        | PDT_09708 | transaldolase                            | 140.76                                    | 426.35   | Up                  |
| <b>Glycolysis</b>                |           |                                          |                                           |          |                     |
| PDE_03370                        | PDT_03559 | glucokinase                              | 13.26                                     | 9.08     |                     |
| PDE_03592                        | PDT_03793 | hexokinase                               | 58.82                                     | 50.89    |                     |
| PDE_00878                        | PDT_00914 | hexokinase                               | 13.94                                     | 1.65     |                     |
| PDE_03526                        | PDT_03726 | hexokinase                               | 1.7                                       | 0        |                     |
| PDE_09139                        | PDT_09437 | glucokinase                              | 3.06                                      | 2.75     |                     |
| PDE_03736                        | PDT_03949 | glucose-6-phosphate isomerase            | 22.78                                     | 14.85    |                     |
| PDE_01271                        | PDT_01337 | 6-phosphofructokinase                    | 35.02                                     | 45.94    |                     |
| PDE_08481                        | PDT_08759 | fructose-1,6-bisphosphatase              | 56.1                                      | 49.24    |                     |
| PDE_04802                        | PDT_05028 | fructose-bisphosphate aldolase           | 1046.18                                   | 920.64   |                     |
| PDE_07330                        | PDT_07588 | triosephosphate isomerase                | 137.02                                    | 335.03   | Up                  |
| PDE_03074                        | PDT_03244 | triosephosphate isomerase                | 16.66                                     | 14.03    |                     |
| PDE_09952                        | PDT_10268 | glyceraldehyde 3-phosphate dehydrogenase | 1295.4                                    | 1998.06  |                     |
| PDE_04588                        | PDT_04791 | glyceraldehyde 3-phosphate dehydrogenase | 0.68                                      | 29.98    | Up                  |
| PDE_07158                        | PDT_07413 | phosphoglycerate kinase                  | 25.16                                     | 5.5      |                     |
| PDE_04961                        | PDT_05192 | phosphoglycerate mutase                  | 122.74                                    | 177.42   |                     |
| PDE_07305                        | PDT_07562 | phosphoglycerate mutase                  | 29.58                                     | 42.63    |                     |

|                      |           |                                                                                  |        |        |      |
|----------------------|-----------|----------------------------------------------------------------------------------|--------|--------|------|
| PDE_03403            | PDT_03596 | phosphoglycerate mutase                                                          | 27.54  | 38.51  |      |
| PDE_08991            | PDT_09284 | phosphoglycerate mutase                                                          | 5.1    | 3.3    |      |
| PDE_02546            | PDT_02669 | enolase                                                                          | 239.36 | 128.73 |      |
| PDE_05188            | PDT_05422 | pyruvate kinase                                                                  | 87.04  | 106.45 |      |
| <b>Citrate cycle</b> |           |                                                                                  |        |        |      |
| PDE_02440            | PDT_02555 | pyruvate dehydrogenase E1 component subunit alpha                                | 76.16  | 91.32  |      |
| PDE_01446            | PDT_01525 | pyruvate dehydrogenase E1 component subunit beta                                 | 22.78  | 19.8   |      |
| PDE_02153            | PDT_02249 | pyruvate dehydrogenase E2 component (dihydrolipoamide acetyltransferase)         | 189.04 | 624.39 | Up   |
| PDE_01946            | PDT_02034 | pyruvate dehydrogenase E2 component (dihydrolipoamide acetyltransferase)         | 67.32  | 68.22  |      |
| PDE_01700            | PDT_01785 | dihydrolipoamide dehydrogenase                                                   | 113.22 | 156.51 |      |
| PDE_09135            | PDT_09433 | citrate synthase                                                                 | 375.7  | 814.46 | Up   |
| PDE_03487            | PDT_03685 | citrate synthase                                                                 | 80.92  | 68.77  |      |
| PDE_07922            | PDT_08190 | ATP-citrate synthase subunit 1                                                   | 21.42  | 11.55  |      |
| PDE_07924            | PDT_08192 | ATP-citrate synthase subunit 2                                                   | 51.34  | 12.65  | Down |
| PDE_08183            | PDT_08451 | aconitate hydratase                                                              | 7.48   | 118.83 | Up   |
| PDE_02592            | PDT_02726 | aconitate hydratase                                                              | 53.38  | 262.69 | Up   |
| PDE_01899            | PDT_01987 | isocitrate dehydrogenase                                                         | 132.26 | 495.66 | Up   |
| PDE_08580            | PDT_08860 | 2-oxoglutarate dehydrogenase E1 component                                        | 83.3   | 69.32  |      |
| PDE_01492            | PDT_01571 | 2-oxoglutarate dehydrogenase E2 component (dihydrolipoamide succinyltransferase) | 209.78 | 147.71 |      |
| PDE_00668            | PDT_00697 | succinyl-CoA synthetase alpha subunit                                            | 6.46   | 21.45  |      |
| PDE_09282            | PDT_09586 | succinyl-CoA synthetase alpha subunit                                            | 127.5  | 142.21 |      |
| PDE_05762            | PDT_05996 | succinyl-CoA synthetase beta subunit                                             | 76.16  | 57.49  |      |
| PDE_01111            | PDT_01156 | succinyl-CoA synthetase beta subunit                                             | 1.7    | 0      |      |
| PDE_01985            | PDT_02073 | succinate dehydrogenase (ubiquinone) flavoprotein subunit                        | 104.38 | 90.5   |      |
| PDE_01648            | PDT_01732 | succinate dehydrogenase (ubiquinone) flavoprotein subunit                        | 257.72 | 358.41 |      |
| PDE_07264            | PDT_07521 | succinate dehydrogenase (ubiquinone) iron-sulfur protein                         | 226.78 | 279.74 |      |
| PDE_00477            | PDT_00494 | succinate dehydrogenase (ubiquinone) membrane anchor subunit                     | 73.78  | 41.53  |      |

|                                              |             |                                                              |        |         |    |
|----------------------------------------------|-------------|--------------------------------------------------------------|--------|---------|----|
| PDE_09828                                    | PDT_10141   | succinate dehydrogenase<br>(ubiquinone) cytochrome b subunit | 168.3  | 329.8   |    |
| PDE_03394                                    | PDT_03587   | fumarate hydratase                                           | 75.82  | 101.5   |    |
| PDE_02150                                    | PDT_02246   | malate dehydrogenase                                         | 879.58 | 1543.93 |    |
| PDE_01008                                    | PDT_01049   | malate dehydrogenase                                         | 2.72   | 318.25  | Up |
| <b>Intracellular cellodextrin metabolism</b> |             |                                                              |        |         |    |
| PDE_00607                                    | PDT_00629   | cellodextrin/lactose transporter <sup>b</sup>                | 159.8  | 1531.83 | Up |
| PDE_07257                                    | PDT_07514   | cellodextrin/lactose transporter                             | 7.82   | 43.46   | Up |
| PDE_00753                                    | PDT_00784   | cellodextrin/lactose transporter                             | 366.52 | 1236.16 | Up |
| PDE_02109                                    | PDT_02206   | cellodextrin/lactose transporter                             | 4.42   | 1.41    |    |
| PDE_02900                                    | PDT_03055   | cellodextrin/lactose transporter                             | 4.08   | 3.11    |    |
| PDE_04820                                    | PDT_05046   | cellodextrin/lactose transporter                             | 7.48   | 0       |    |
| PDE_04857                                    | PDT_05087   | cellodextrin/lactose transporter                             | 22.44  | 92.97   | Up |
| PDE_08035                                    | Not present | cellodextrin/lactose transporter                             | 30.99  | -       |    |
| PDE_09011                                    | PDT_09305   | cellodextrin/lactose transporter                             | 11.9   | 0       |    |
| PDE_09395                                    | PDT_09705   | cellodextrin/lactose transporter                             | 9.52   | 4.8     |    |
| PDE_09534                                    | PDT_09846   | cellodextrin/lactose transporter                             | 1.02   | 0       |    |
| PDE_00579                                    | PDT_00600   | intracellular beta-glucosidase                               | 892.84 | 9123.3  | Up |
| PDE_09535                                    | PDT_09847   | intracellular beta-glucosidase                               | 4.42   | 3.03    |    |
| PDE_04859                                    | PDT_05089   | intracellular beta-glucosidase                               | 38.08  | 108.37  | Up |
| PDE_02108                                    | PDT_02205   | intracellular beta-glucosidase                               | 19.04  | 34.11   |    |
| PDE_03485                                    | PDT_03683   | intracellular beta-glucosidase                               | 19.72  | 20.63   |    |
| PDE_04251                                    | PDT_04455   | intracellular beta-glucosidase                               | 98.26  | 117.45  |    |

<sup>a</sup> Significantly differential expression in JU-A10-T relative to 114-2 (FDR lower than 0.001).

<sup>b</sup> Cellodextrin transporter in fungi may also transport lactose and *vice versa*.

**Table S11.** KEGG annotation of amino acids biosynthesis-involved enzymes significantly up-regulated in JU-A10-T.

| Gene ID   |           | KEGG Orthology                                                                                 | KEGG Pathway                                                                                                                                 | Transcription level<br>(tags per million) |          |
|-----------|-----------|------------------------------------------------------------------------------------------------|----------------------------------------------------------------------------------------------------------------------------------------------|-------------------------------------------|----------|
| 114-2     | JU-A10-T  |                                                                                                |                                                                                                                                              | 114-2                                     | JU-A10-T |
| PDE_00223 | PDT_00227 | K13830,pentafunctional AROM polypeptide [EC:4.2.3.4<br>4.2.1.10 1.1.1.25 2.7.1.71 2.5.1.19]    | Phenylalanine, tyrosine and tryptophan biosynthesis                                                                                          | 103.02                                    | 320.45   |
| PDE_00542 | PDT_00562 | K00052,3-isopropylmalate dehydrogenase [EC:1.1.1.85]                                           | Valine, leucine and isoleucine biosynthesis                                                                                                  | 31.28                                     | 95.72    |
| PDE_00816 | PDT_00849 | K00765,ATP phosphoribosyltransferase [EC:2.4.2.17]                                             | Histidine metabolism                                                                                                                         | 20.74                                     | 50.89    |
| PDE_01576 | PDT_01657 | K00958,sulfate adenylyltransferase [EC:2.7.7.4]                                                | Sulfur metabolism;Purine metabolism;Selenocompound<br>metabolism                                                                             | 42.84                                     | 316.6    |
| PDE_03644 | PDT_03852 | K01653,acetolactate synthase I/III small subunit [EC:2.2.1.6]                                  | Valine, leucine and isoleucine biosynthesis;Pantothenate and CoA<br>biosynthesis;Butanoate metabolism;C5-Branched dibasic acid<br>metabolism | 92.82                                     | 237.38   |
| PDE_03916 | PDT_04140 | K01655,homocitrate synthase [EC:2.3.3.14]                                                      | Lysine biosynthesis;Pyruvate metabolism                                                                                                      | 70.72                                     | 149.91   |
| PDE_04061 | PDT_04264 | K00147,glutamate-5-semialdehyde dehydrogenase<br>[EC:1.2.1.41]                                 | Arginine and proline metabolism                                                                                                              | 21.76                                     | 155.14   |
| PDE_04220 | PDT_04423 | K01738,cysteine synthase A [EC:2.5.1.47]                                                       | Sulfur metabolism;Cysteine and methionine metabolism                                                                                         | 83.98                                     | 241.78   |
| PDE_04799 | PDT_05025 | K00003,homoserine dehydrogenase [EC:1.1.1.3]                                                   | Lysine biosynthesis;Cysteine and methionine metabolism;Glycine,<br>serine and threonine metabolism                                           | 9.18                                      | 63.81    |
| PDE_04890 | PDT_05120 | K01694,tryptophan synthase [EC:4.2.1.20]                                                       | Glycine, serine and threonine metabolism;Phenylalanine, tyrosine<br>and tryptophan biosynthesis                                              | 39.1                                      | 240.96   |
| PDE_05175 | PDT_05409 | K00549,5-methyltetrahydropteroyltriglutamate--homocystein<br>e methyltransferase [EC:2.1.1.14] | Cysteine and methionine metabolism;Selenocompound metabolism                                                                                 | 3.74                                      | 25.86    |
| PDE_05687 | PDT_05921 | K01760,cystathionine beta-lyase [EC:4.4.1.8]                                                   | Sulfur metabolism;Cysteine and methionine<br>metabolism;Selenocompound metabolism                                                            | 36.04                                     | 74.27    |

|           |           |                                                                                             |                                                                 |       |        |
|-----------|-----------|---------------------------------------------------------------------------------------------|-----------------------------------------------------------------|-------|--------|
| PDE_06100 | PDT_06329 | K03785,3-dehydroquinate dehydratase I [EC:4.2.1.10]                                         | Phenylalanine, tyrosine and tryptophan biosynthesis             | 60.86 | 144.96 |
| PDE_06146 | PDT_06378 | K01953,asparagine synthase (glutamine-hydrolysing) [EC:6.3.5.4]                             | Alanine, aspartate and glutamate metabolism;Nitrogen metabolism | 35.36 | 322.37 |
| PDE_07236 | PDT_07492 | K00860,adenylylsulfate kinase [EC:2.7.1.25]                                                 | Sulfur metabolism;Purine metabolism                             | 14.28 | 147.16 |
| PDE_08437 | PDT_08712 | K00143,L-aminoadipate-semialdehyde dehydrogenase [EC:1.2.1.31]                              | Lysine biosynthesis;Lysine degradation                          | 39.78 | 273.41 |
| PDE_09601 | PDT_09914 | K00620,glutamate N-acetyltransferase / amino-acid N-acetyltransferase [EC:2.3.1.35 2.3.1.1] | Arginine and proline metabolism                                 | 53.04 | 112.23 |

**Table S12.** Transcription levels of genes involved in protein folding in *P. decumbens* 114-2 and JU-A10-T.

| Gene ID   |           | Function prediction <sup>a</sup>                      | Transcription level<br>(tags per million) |          | Change <sup>b</sup> |
|-----------|-----------|-------------------------------------------------------|-------------------------------------------|----------|---------------------|
| 114-2     | JU-A10-T  |                                                       | 114-2                                     | JU-A10-T |                     |
| PDE_06215 | PDT_06448 | protein disulfide-isomerase A1 (PdiA)                 | 537.2                                     | 3204.21  | Up                  |
| PDE_07464 | PDT_07726 | protein disulfide-isomerase A6                        | 0                                         | 0        |                     |
| PDE_02993 | PDT_03160 | protein disulfide-isomerase A6                        | 242.76                                    | 390.86   |                     |
| PDE_03829 | PDT_04047 | protein disulfide-isomerase                           | 76.5                                      | 106.45   |                     |
| PDE_06501 | PDT_06735 | endoplasmic oxidoreductin-1                           | 40.12                                     | 43.74    |                     |
| PDE_07994 | PDT_08262 | FAD synthetase                                        | 11.9                                      | 7.7      |                     |
| PDE_00166 | PDT_00169 | GTP cyclohydrolase II                                 | 40.8                                      | 15.68    |                     |
| PDE_04627 | PDT_04834 | uracil-regulated protein 1                            | 145.18                                    | 100.95   |                     |
| PDE_03322 | PDT_03503 | FAD-containing monooxygenase EthA                     | 100.3                                     | 80.87    |                     |
| PDE_02526 | PDT_02648 | uncharacterized J domain-containing protein           | 41.82                                     | 57.21    |                     |
| PDE_04145 | PDT_04346 | DnaJ-related protein SCJ1                             | 124.1                                     | 16.23    | Down                |
| PDE_08629 | PDT_08911 | calnexin                                              | 71.74                                     | 479.16   | Up                  |
| PDE_03689 | PDT_03898 | peptidyl-prolyl cis-trans isomerase B (cyclophilin B) | 717.74                                    | 41.81    |                     |
| PDE_05349 | PDT_05586 | FK506-binding protein 2                               | 39.1                                      | 190.34   | Up                  |
| PDE_08980 | PDT_09273 | molecular chaperone BipA                              | 863.94                                    | 2352.89  |                     |
| PDE_00412 | PDT_00420 | Hsp70 family chaperone Lhs1/Orp150                    | 42.16                                     | 126.25   | Up                  |

<sup>a</sup> Proteins are annotated according to the results in *Aspergillus niger* CBS 513.88 [1].

<sup>b</sup> Significantly differential expression in JU-A10-T relative to 114-2 (FDR lower than 0.001).

## Reference

1. Pel HJ, de Winde JH, Archer DB, Dyer PS, Hofmann G, et al. (2007) Genome sequencing and analysis of the versatile cell factory *Aspergillus niger* CBS 513.88. Nat Biotechnol 25: 221-231.

**Table S13.** KEGG annotation of oxidoreductases significantly down-regulated in JU-A10-T.

| Gene ID   |           | KEGG annotation                                                           |                                                                                                                                                                                                         | Transcription level (tags per million) |          | Amino acid metabolism involved |
|-----------|-----------|---------------------------------------------------------------------------|---------------------------------------------------------------------------------------------------------------------------------------------------------------------------------------------------------|----------------------------------------|----------|--------------------------------|
| 114-2     | JU-A10-T  | Orthology                                                                 | Pathway                                                                                                                                                                                                 | 114-2                                  | JU-A10-T |                                |
| PDE_00111 | PDT_00113 | K00100,E1.1.1.-                                                           | Fructose and mannose metabolism;Bisphenol degradation;Linoleic acid metabolism;Chloroalkane and chloroalkene degradation;Butanoate metabolism                                                           | 54.4                                   | 10.45    |                                |
| PDE_00170 | PDT_00173 | K00540,E1.-.-                                                             | -                                                                                                                                                                                                       | 60.86                                  | 6.88     |                                |
| PDE_00249 | PDT_00254 | -                                                                         | -                                                                                                                                                                                                       | 113.56                                 | 36.58    |                                |
| PDE_00298 | PDT_00305 | K05920,E1.16.1.-                                                          | -                                                                                                                                                                                                       | 40.12                                  | 4.95     |                                |
| PDE_00370 | PDT_00378 | K00362,nitrite reductase (NAD(P)H large subunit [EC:1.7.1.4]              | Nitrogen metabolism                                                                                                                                                                                     | 92.14                                  | 4.4      |                                |
| PDE_00525 | PDT_00544 | K00517,E1.14.-                                                            | Bisphenol degradation;Polycyclic aromatic hydrocarbon degradation;Aminobenzoate degradation;Limonene and pinene degradation;Stilbenoid, diarylheptanoid and gingerol biosynthesis                       | 343.06                                 | 36.31    |                                |
| PDE_00643 | PDT_00671 | K10256,omega-6 fatty acid desaturase (delta-12 desaturase) [EC:1.14.19.-] | Biosynthesis of unsaturated fatty acids                                                                                                                                                                 | 44.2                                   | 7.7      |                                |
| PDE_00646 | PDT_00674 | K00276,primary-amine oxidase [EC:1.4.3.21]                                | Glycine, serine and threonine metabolism;Tyrosine metabolism;Phenylalanine metabolism;beta-Alanine metabolism;Isoquinoline alkaloid biosynthesis;Tropane, piperidine and pyridine alkaloid biosynthesis | 23.46                                  | 1.65     | Yes                            |
| PDE_00709 | PDT_00739 | -                                                                         | -                                                                                                                                                                                                       | 58.82                                  | 17.6     |                                |
| PDE_00787 | PDT_00820 | K07119,K07119                                                             | -                                                                                                                                                                                                       | 116.96                                 | 31.91    |                                |
| PDE_00799 | PDT_00832 | K00059,3-oxoacyl-[acyl-carrier                                            | Fatty acid biosynthesis;Biosynthesis of unsaturated fatty acids                                                                                                                                         | 103.36                                 | 7.43     |                                |

|           |           |                                                                       |                                                                                                                                                                                                                                              |         |        |     |
|-----------|-----------|-----------------------------------------------------------------------|----------------------------------------------------------------------------------------------------------------------------------------------------------------------------------------------------------------------------------------------|---------|--------|-----|
|           |           | protein] reductase [EC:1.1.1.100]                                     |                                                                                                                                                                                                                                              |         |        |     |
| PDE_00809 | PDT_00842 | K00540,E1.-.-.-                                                       | -                                                                                                                                                                                                                                            | 18.7    | 0      |     |
| PDE_00923 | PDT_00960 | K03843,alpha-1,3/alpha-1,6-mannosyltransferase [EC:2.4.1.132 2.4.1.-] | -                                                                                                                                                                                                                                            | 121.04  | 1.65   |     |
| PDE_00966 | PDT_01005 | K00108,choline dehydrogenase [EC:1.1.99.1]                            | Glycine, serine and threonine metabolism                                                                                                                                                                                                     | 136.34  | 51.16  | Yes |
| PDE_00968 | PDT_01007 | K00130,betaine-aldehyde dehydrogenase [EC:1.2.1.8]                    | Glycine, serine and threonine metabolism                                                                                                                                                                                                     | 45.56   | 9.08   | Yes |
| PDE_01023 | PDT_01064 | K00227,lathosterol oxidase [EC:1.14.21.6]                             | Steroid biosynthesis                                                                                                                                                                                                                         | 165.58  | 36.86  |     |
| PDE_01064 | PDT_01106 | K00517,E1.14.-.-                                                      | Bisphenol degradation;Polycyclic aromatic hydrocarbon degradation;Aminobenzoate degradation;Limonene and pinene degradation;Stilbenoid, diarylheptanoid and gingerol biosynthesis                                                            | 27.54   | 0      |     |
| PDE_01068 | PDT_01110 | K00492,E1.14.13.-                                                     | Histidine metabolism;Chlorocyclohexane and chlorobenzene degradation;Bisphenol degradation;Toluene degradation;Polycyclic aromatic hydrocarbon degradation;Naphthalene degradation;Aminobenzoate degradation;Limonene and pinene degradation | 129.54  | 3.3    | Yes |
| PDE_01070 | PDT_01112 | K00517,E1.14.-.-                                                      | Bisphenol degradation;Polycyclic aromatic hydrocarbon degradation;Aminobenzoate degradation;Limonene and pinene degradation;Stilbenoid, diarylheptanoid and gingerol biosynthesis                                                            | 34.68   | 0      |     |
| PDE_01080 | PDT_01123 | K00122,formate dehydrogenase [EC:1.2.1.2]                             | Glyoxylate and dicarboxylate metabolism;Methane metabolism                                                                                                                                                                                   | 1574.88 | 116.35 |     |
| PDE_01188 | PDT_01245 | -                                                                     | -                                                                                                                                                                                                                                            | 761.94  | 10.45  |     |
| PDE_01216 | PDT_01274 | K00517,E1.14.-.-                                                      | Bisphenol degradation;Polycyclic aromatic hydrocarbon degradation;Aminobenzoate degradation;Limonene and pinene degradation;Stilbenoid, diarylheptanoid and gingerol biosynthesis                                                            | 127.84  | 0.55   |     |



|           |           |                                                                    |                                                                                                                                                                                                                                            |       |        |     |
|-----------|-----------|--------------------------------------------------------------------|--------------------------------------------------------------------------------------------------------------------------------------------------------------------------------------------------------------------------------------------|-------|--------|-----|
| PDE_01217 | PDT_01275 | K00667,fatty acid synthase subunit alpha, fungi type [EC:2.3.1.86] | Fatty acid biosynthesis                                                                                                                                                                                                                    | 608.6 | 0      |     |
| PDE_01220 | PDT_01278 | K00668,fatty acid synthase subunit beta, fungi type [EC:2.3.1.86]  | Fatty acid biosynthesis                                                                                                                                                                                                                    | 550.8 | 146.06 |     |
| PDE_01238 | PDT_01296 | -                                                                  | -                                                                                                                                                                                                                                          | 21.76 | 2.2    |     |
| PDE_01278 | PDT_01344 | K13953,alcohol dehydrogenase, propanol-preferring [EC:1.1.1.1]     | Glycolysis / Gluconeogenesis;Fatty acid metabolism;Tyrosine metabolism;Chloroalkane and chloroalkene degradation;Naphthalene degradation;Retinol metabolism;Metabolism of xenobiotics by cytochrome P450;Drug metabolism - cytochrome P450 | 56.1  | 0      | Yes |
| PDE_01374 | PDT_01451 | K00155,E1.2.1.-                                                    | Geraniol degradation;Naphthalene degradation;Limonene and pinene degradation                                                                                                                                                               | 95.54 | 29.16  |     |
| PDE_01384 | PDT_01461 | K00281,glycine dehydrogenase [EC:1.4.4.2]                          | Glycine, serine and threonine metabolism                                                                                                                                                                                                   | 92.48 | 23.66  | Yes |
| PDE_01390 | PDT_01467 | K00540,E1.-.-                                                      | -                                                                                                                                                                                                                                          | 52.02 | 1.1    |     |
| PDE_01395 | PDT_01472 | K00517,E1.14.-.-                                                   | Bisphenol degradation;Polycyclic aromatic hydrocarbon degradation;Aminobenzoate degradation;Limonene and pinene degradation;Stilbenoid, diarylheptanoid and gingerol biosynthesis                                                          | 90.1  | 33.01  |     |
| PDE_01406 | PDT_01483 | -                                                                  | -                                                                                                                                                                                                                                          | 37.06 | 0      |     |
| PDE_01413 | PDT_01490 | K00108,choline dehydrogenase [EC:1.1.99.1]                         | Glycine, serine and threonine metabolism                                                                                                                                                                                                   | 38.08 | 0      | Yes |
| PDE_01418 | PDT_01496 | K00517,E1.14.-.-                                                   | Bisphenol degradation;Polycyclic aromatic hydrocarbon degradation;Aminobenzoate degradation;Limonene and pinene degradation;Stilbenoid, diarylheptanoid and gingerol biosynthesis                                                          | 44.54 | 3.85   |     |
| PDE_01451 | PDT_01530 | K00667,fatty acid synthase subunit alpha, fungi type [EC:2.3.1.86] | Fatty acid biosynthesis                                                                                                                                                                                                                    | 95.2  | 26.96  |     |
| PDE_01482 | PDT_01561 | K00016,L-lactate dehydrogenase                                     | Glycolysis / Gluconeogenesis;Cysteine and methionine                                                                                                                                                                                       | 17    | 0      | Yes |

|           |           |                                                                                       |                                                                                                                                                                                    |         |        |     |
|-----------|-----------|---------------------------------------------------------------------------------------|------------------------------------------------------------------------------------------------------------------------------------------------------------------------------------|---------|--------|-----|
|           |           | [EC:1.1.1.27]                                                                         | metabolism;Pyruvate metabolism;Propanoate metabolism                                                                                                                               |         |        |     |
| PDE_01689 | PDT_01773 | K14338,cytochrome P450 /<br>NADPH-cytochrome P450 reductase<br>[EC:1.14.14.1 1.6.2.4] | Fatty acid metabolism;Tryptophan metabolism;Aminobenzoate<br>degradation                                                                                                           | 23.46   | 2.75   | Yes |
| PDE_01701 | PDT_01786 | K07078,unclassified                                                                   | -                                                                                                                                                                                  | 19.38   | 0.83   |     |
| PDE_01780 | PDT_01866 | K00135,succinate-semialdehyde<br>dehydrogenase (NADP+) [EC:1.2.1.16]                  | Alanine, aspartate and glutamate metabolism;Tyrosine<br>metabolism;Butanoate metabolism                                                                                            | 275.74  | 16.78  | Yes |
| PDE_01808 | PDT_01896 | K03671,thioredoxin 1                                                                  | -                                                                                                                                                                                  | 439.96  | 29.98  |     |
| PDE_02071 | PDT_02166 | K00463,indoleamine 2,3-dioxygenase<br>[EC:1.13.11.52]                                 | Tryptophan metabolism;African trypanosomiasis                                                                                                                                      | 107.1   | 11.28  | Yes |
| PDE_02128 | PDT_02224 | -                                                                                     | -                                                                                                                                                                                  | 78.2    | 4.4    |     |
| PDE_02139 | PDT_02235 | K00540,E1.-.-.                                                                        | -                                                                                                                                                                                  | 18.36   | 0      |     |
| PDE_02172 | PDT_02269 | K00012,UDPglucose 6-dehydrogenase<br>[EC:1.1.1.22]                                    | Pentose and glucuronate interconversions;Ascorbate and aldarate<br>metabolism;Starch and sucrose metabolism;Amino sugar and nucleotide<br>sugar metabolism                         | 34.68   | 7.7    |     |
| PDE_02205 | PDT_02303 | K00507,stearyl-CoA desaturase<br>(delta-9 desaturase) [EC:1.14.19.1]                  | Biosynthesis of unsaturated fatty acids;PPAR signaling pathway                                                                                                                     | 187     | 23.93  |     |
| PDE_02350 | PDT_02460 | K00100,E1.1.1.-                                                                       | Fructose and mannose metabolism;Bisphenol degradation;Linoleic acid<br>metabolism;Chloroalkane and chloroalkene degradation;Butanoate<br>metabolism                                | 85.34   | 12.93  |     |
| PDE_02368 | PDT_02478 | K00540,E1.-.-.                                                                        | -                                                                                                                                                                                  | 102.34  | 15.13  |     |
| PDE_02372 | PDT_02483 | K00228,coproporphyrinogen III<br>oxidase [EC:1.3.3.3]                                 | Porphyrin and chlorophyll metabolism                                                                                                                                               | 320.62  | 47.59  |     |
| PDE_02379 | PDT_02490 | K03283,heat shock 70kDa protein 1/8                                                   | Spliceosome;MAPK signaling pathway;Protein processing in endoplasmic<br>reticulum;Endocytosis;Antigen processing and<br>presentation;Legionellosis;Toxoplasmosis;Measles;Influenza | 1965.88 | 274.79 |     |

|           |           |                                                                                                  |                                                                                                                                                                                                                                                               |        |        |     |
|-----------|-----------|--------------------------------------------------------------------------------------------------|---------------------------------------------------------------------------------------------------------------------------------------------------------------------------------------------------------------------------------------------------------------|--------|--------|-----|
|           |           |                                                                                                  | A;Epstein-Barr virus infection                                                                                                                                                                                                                                |        |        |     |
| PDE_02386 | PDT_02500 | K00264,glutamate synthase (NADPH/NADH) [EC:1.4.1.13 1.4.1.14]                                    | Alanine, aspartate and glutamate metabolism;Nitrogen metabolism                                                                                                                                                                                               | 69.7   | 17.88  | Yes |
| PDE_02393 | PDT_02507 | K00309,E1.5.3.-                                                                                  | -                                                                                                                                                                                                                                                             | 145.52 | 11.28  |     |
| PDE_02419 | PDT_02534 | K00540,E1.-.-                                                                                    | -                                                                                                                                                                                                                                                             | 37.4   | 7.43   |     |
| PDE_02454 | PDT_02570 | K00463,indoleamine 2,3-dioxygenase [EC:1.13.11.52]                                               | Tryptophan metabolism;African trypanosomiasis                                                                                                                                                                                                                 | 115.6  | 1.65   | Yes |
| PDE_02461 | PDT_02579 | K00360,nitrate reductase (NADH) [EC:1.7.1.1]                                                     | Nitrogen metabolism                                                                                                                                                                                                                                           | 75.14  | 5.23   |     |
| PDE_02605 | PDT_02741 | -                                                                                                | -                                                                                                                                                                                                                                                             | 78.54  | 8.25   |     |
| PDE_03064 | PDT_03234 | K00121,S-(hydroxymethyl)glutathione dehydrogenase / alcohol dehydrogenase [EC:1.1.1.284 1.1.1.1] | Glycolysis / Gluconeogenesis;Fatty acid metabolism;Tyrosine metabolism;Chloroalkane and chloroalkene degradation;Naphthalene degradation;Methane metabolism;Retinol metabolism;Metabolism of xenobiotics by cytochrome P450;Drug metabolism - cytochrome P450 | 396.78 | 122.13 | Yes |
| PDE_03073 | PDT_03243 | K00226,dihydroorotate oxidase [EC:1.3.3.1]                                                       | Pyrimidine metabolism                                                                                                                                                                                                                                         | 34     | 2.48   |     |
| PDE_03105 | PDT_03275 | K00297,methylenetetrahydrofolate reductase (NADPH) [EC:1.5.1.20]                                 | One carbon pool by folate;Methane metabolism;Carbon fixation pathways in prokaryotes                                                                                                                                                                          | 62.56  | 2.2    |     |
| PDE_03254 | PDT_03433 | K00528,ferredoxin--NADP+ reductase [EC:1.18.1.2]                                                 | -                                                                                                                                                                                                                                                             | 85.34  | 38.23  |     |
| PDE_03282 | PDT_03462 | K00018,glycerate dehydrogenase [EC:1.1.1.29]                                                     | Glycine, serine and threonine metabolism;Glyoxylate and dicarboxylate metabolism;Methane metabolism                                                                                                                                                           | 133.28 | 9.08   | Yes |
| PDE_03316 | PDT_03497 | K14171,alkyl hydroperoxide reductase 1 [EC:1.11.1.15]                                            | Sulfur relay system                                                                                                                                                                                                                                           | 167.28 | 53.91  |     |
| PDE_03468 | PDT_03664 | K03379,cyclohexanone                                                                             | Caprolactam degradation                                                                                                                                                                                                                                       | 24.48  | 2.48   |     |

|           |           |                                                         |                                                                                                                                                                                                                  |        |       |     |
|-----------|-----------|---------------------------------------------------------|------------------------------------------------------------------------------------------------------------------------------------------------------------------------------------------------------------------|--------|-------|-----|
|           |           | monooxygenase [EC:1.14.13.22]                           |                                                                                                                                                                                                                  |        |       |     |
| PDE_03787 | PDT_04005 | K00469,inositol oxygenase<br>[EC:1.13.99.1]             | Ascorbate and aldarate metabolism;Inositol phosphate metabolism                                                                                                                                                  | 189.38 | 48.14 |     |
| PDE_03899 | PDT_04123 | K00129,aldehyde dehydrogenase<br>(NAD(P)+) [EC:1.2.1.5] | Glycolysis / Gluconeogenesis;Histidine metabolism;Tyrosine<br>metabolism;Phenylalanine metabolism;beta-Alanine<br>metabolism;Metabolism of xenobiotics by cytochrome P450;Drug<br>metabolism - cytochrome P450   | 41.48  | 4.4   | Yes |
| PDE_03901 | PDT_04125 | K00276,primary-amine oxidase<br>[EC:1.4.3.21]           | Glycine, serine and threonine metabolism;Tyrosine<br>metabolism;Phenylalanine metabolism;beta-Alanine<br>metabolism;Isoquinoline alkaloid biosynthesis;Tropane, piperidine and<br>pyridine alkaloid biosynthesis | 75.82  | 15.13 | Yes |
| PDE_03956 | PDT_04184 | K07824,benzoate 4-monooxygenase<br>[EC:1.14.13.12]      | Benzoate degradation;Aminobenzoate degradation                                                                                                                                                                   | 39.44  | 0     |     |
| PDE_03975 | PDT_04204 | K00327,NADPH-ferrihemoprotein<br>reductase [EC:1.6.2.4] | -                                                                                                                                                                                                                | 50.32  | 14.85 |     |
| PDE_04016 | PDT_04219 | K00517,E1.14.-.-                                        | Bisphenol degradation;Polycyclic aromatic hydrocarbon<br>degradation;Aminobenzoate degradation;Limonene and pinene<br>degradation;Stilbenoid, diarylheptanoid and gingerol biosynthesis                          | 127.84 | 0     |     |
| PDE_04020 | PDT_04223 | K00359,NADH oxidase [EC:1.6.-.-]                        | -                                                                                                                                                                                                                | 101.32 | 17.05 |     |
| PDE_04025 | PDT_04228 | -                                                       | -                                                                                                                                                                                                                | 20.4   | 0     |     |
| PDE_04028 | PDT_04231 | -                                                       | -                                                                                                                                                                                                                | 110.84 | 0     |     |
| PDE_04216 | PDT_04418 | -                                                       | -                                                                                                                                                                                                                | 65.96  | 6.05  |     |
| PDE_04218 | PDT_04420 | K00120,E1.1.-.-                                         | Bisphenol degradation;Polycyclic aromatic hydrocarbon<br>degradation;Chloroalkane and chloroalkene degradation;Naphthalene<br>degradation;Aminobenzoate degradation;Limonene and pinene degradation              | 141.78 | 30.81 |     |
| PDE_04228 | PDT_04431 | K10438,3-hydroxyphenylacetate                           | Styrene degradation                                                                                                                                                                                              | 288.66 | 19.8  |     |

|           |           |                                                                             |                                                                                                                                                                                   |        |       |     |
|-----------|-----------|-----------------------------------------------------------------------------|-----------------------------------------------------------------------------------------------------------------------------------------------------------------------------------|--------|-------|-----|
|           |           | 6-hydroxylase [EC:1.14.13.63]                                               |                                                                                                                                                                                   |        |       |     |
| PDE_04264 | PDT_04467 | -                                                                           | -                                                                                                                                                                                 | 135.66 | 34.93 |     |
| PDE_04265 | PDT_04469 | K00517,E1.14.-.-                                                            | Bisphenol degradation;Polycyclic aromatic hydrocarbon degradation;Aminobenzoate degradation;Limonene and pinene degradation;Stilbenoid, diarylheptanoid and gingerol biosynthesis | 284.58 | 60.79 |     |
| PDE_04277 | PDT_04482 | K00100,E1.1.1.-                                                             | Fructose and mannose metabolism;Bisphenol degradation;Linoleic acid metabolism;Chloroalkane and chloroalkene degradation;Butanoate metabolism                                     | 109.14 | 2.48  |     |
| PDE_04366 | PDT_04569 | -                                                                           | -                                                                                                                                                                                 | 119.34 | 19.53 |     |
| PDE_04376 | PDT_04579 | -                                                                           | -                                                                                                                                                                                 | 108.8  | 18.43 |     |
| PDE_04495 | PDT_04694 | K00059,3-oxoacyl-[acyl-carrier protein] reductase [EC:1.1.1.100]            | Fatty acid biosynthesis;Biosynthesis of unsaturated fatty acids                                                                                                                   | 352.24 | 0.83  |     |
| PDE_04527 | PDT_04728 | K00456,cysteine dioxygenase [EC:1.13.11.20]                                 | Cysteine and methionine metabolism;Taurine and hypotaurine metabolism                                                                                                             | 78.88  | 1.38  | Yes |
| PDE_04530 | PDT_04731 | K00413,ubiquinol-cytochrome c reductase cytochrome c1 subunit [EC:1.10.2.2] | Oxidative phosphorylation;Nitrogen metabolism;Two-component system;Cardiac muscle contraction;Alzheimer's disease;Parkinson's disease;Huntington's disease                        | 403.58 | 61.61 |     |
| PDE_04605 | PDT_04810 | K00480,salicylate hydroxylase [EC:1.14.13.1]                                | Dioxin degradation;Polycyclic aromatic hydrocarbon degradation;Naphthalene degradation                                                                                            | 60.52  | 13.48 |     |
| PDE_04628 | PDT_04835 | -                                                                           | -                                                                                                                                                                                 | 50.66  | 2.75  |     |
| PDE_04629 | PDT_04836 | -                                                                           | -                                                                                                                                                                                 | 177.82 | 6.88  |     |
| PDE_04632 | PDT_04839 | K05920,E1.16.1.-                                                            | -                                                                                                                                                                                 | 26.86  | 2.75  |     |
| PDE_04936 | PDT_05167 | K11987,prostaglandin-endoperoxide synthase 2 [EC:1.14.99.1]                 | Arachidonic acid metabolism;VEGF signaling pathway;Retrograde endocannabinoid signaling;Serotonergic synapse;Leishmaniasis;Pathways in cancer;Small cell lung cancer              | 39.78  | 1.93  |     |
| PDE_05132 | PDT_05365 | K05920,E1.16.1.-                                                            | -                                                                                                                                                                                 | 113.22 | 14.85 |     |

|           |           |                                                                                  |                                                                                                                                                                                                       |        |        |     |
|-----------|-----------|----------------------------------------------------------------------------------|-------------------------------------------------------------------------------------------------------------------------------------------------------------------------------------------------------|--------|--------|-----|
| PDE_05158 | PDT_05392 | K00540,E1.-.-.-                                                                  | -                                                                                                                                                                                                     | 56.1   | 15.4   |     |
| PDE_05239 | PDT_05474 | K03381,catechol 1,2-dioxygenase<br>[EC:1.13.11.1]                                | Chlorocyclohexane and chlorobenzene degradation;Benzoate degradation;Fluorobenzoate degradation;Toluene degradation                                                                                   | 167.62 | 7.7    |     |
| PDE_05363 | PDT_05600 | -                                                                                | -                                                                                                                                                                                                     | 48.28  | 12.38  |     |
| PDE_05500 | PDT_05736 | K01552,E3.6.3.-                                                                  | -                                                                                                                                                                                                     | 262.48 | 42.36  |     |
| PDE_05548 | PDT_05782 | K00129,aldehyde dehydrogenase<br>(NAD(P)+) [EC:1.2.1.5]                          | Glycolysis / Gluconeogenesis;Histidine metabolism;Tyrosine metabolism;Phenylalanine metabolism;beta-Alanine metabolism;Metabolism of xenobiotics by cytochrome P450;Drug metabolism - cytochrome P450 | 109.48 | 33.01  | Yes |
| PDE_05550 | PDT_05784 | K03386,peroxiredoxin (alkyl hydroperoxide reductase subunit C)<br>[EC:1.11.1.15] | -                                                                                                                                                                                                     | 168.3  | 43.46  |     |
| PDE_05566 | PDT_05800 | K00257,E1.3.99.-                                                                 | Geraniol degradation                                                                                                                                                                                  | 593.3  | 199.42 |     |
| PDE_05675 | PDT_05910 | K14729,multifunctional beta-oxidation protein [EC:4.2.1.- 1.1.1.-]               | -                                                                                                                                                                                                     | 448.12 | 119.93 |     |
| PDE_05708 | PDT_05942 | K03781,catalase [EC:1.11.1.6]                                                    | Tryptophan metabolism;Glyoxylate and dicarboxylate metabolism;Methane metabolism;Peroxisome;Amyotrophic lateral sclerosis (ALS)                                                                       | 94.86  | 1.38   | Yes |
| PDE_05885 | PDT_06117 | K00463,indoleamine 2,3-dioxygenase<br>[EC:1.13.11.52]                            | Tryptophan metabolism;African trypanosomiasis                                                                                                                                                         | 55.42  | 0      | Yes |
| PDE_05886 | PDT_06118 | -                                                                                | -                                                                                                                                                                                                     | 466.82 | 7.43   |     |
| PDE_05907 | PDT_06138 | K00463,indoleamine 2,3-dioxygenase<br>[EC:1.13.11.52]                            | Tryptophan metabolism;African trypanosomiasis                                                                                                                                                         | 967.64 | 190.07 | Yes |
| PDE_05943 | PDT_06174 | K00480,salicylate hydroxylase<br>[EC:1.14.13.1]                                  | Dioxin degradation;Polycyclic aromatic hydrocarbon degradation;Naphthalene degradation                                                                                                                | 34     | 1.65   |     |
| PDE_05973 | PDT_06205 | K00309,E1.5.3.-                                                                  | -                                                                                                                                                                                                     | 47.6   | 14.58  |     |

|           |           |                                                                     |                                                                                                                                                                                               |        |       |     |
|-----------|-----------|---------------------------------------------------------------------|-----------------------------------------------------------------------------------------------------------------------------------------------------------------------------------------------|--------|-------|-----|
| PDE_06017 | PDT_06248 | -                                                                   | -                                                                                                                                                                                             | 196.52 | 5.78  |     |
| PDE_06042 | PDT_06267 | K00435,peroxiredoxin [EC:1.11.1.-]                                  | -                                                                                                                                                                                             | 15.98  | 0     |     |
| PDE_06295 | PDT_06525 | K00452,3-hydroxyanthranilate 3,4-dioxygenase [EC:1.13.11.6]         | Tryptophan metabolism                                                                                                                                                                         | 112.2  | 50.34 | Yes |
| PDE_06327 | PDT_06557 | K00517,E1.14.-.-                                                    | Bisphenol degradation;Polycyclic aromatic hydrocarbon degradation;Aminobenzoate degradation;Limonene and pinene degradation;Stilbenoid, diarylheptanoid and gingerol biosynthesis             | 581.74 | 26.41 |     |
| PDE_06396 | PDT_06628 | -                                                                   | -                                                                                                                                                                                             | 26.86  | 2.2   |     |
| PDE_06412 | PDT_06645 | -                                                                   | -                                                                                                                                                                                             | 28.9   | 4.4   |     |
| PDE_06474 | PDT_06708 | K00295,methylenetetrahydrofolate dehydrogenase (NAD+) [EC:1.5.1.15] | One carbon pool by folate                                                                                                                                                                     | 78.2   | 11.55 |     |
| PDE_06586 | PDT_06822 | K00540,E1.-.-                                                       | -                                                                                                                                                                                             | 487.22 | 89.67 |     |
| PDE_06706 | PDT_06950 | K00540,E1.-.-                                                       | -                                                                                                                                                                                             | 175.1  | 0.83  |     |
| PDE_06745 | PDT_06990 | K00120,E1.1.-.-                                                     | Bisphenol degradation;Polycyclic aromatic hydrocarbon degradation;Chloroalkane and chloroalkene degradation;Naphthalene degradation;Aminobenzoate degradation;Limonene and pinene degradation | 144.16 | 3.85  |     |
| PDE_06831 | PDT_07078 | K00111,glycerol-3-phosphate dehydrogenase [EC:1.1.5.3]              | Glycerophospholipid metabolism                                                                                                                                                                | 45.22  | 10.73 |     |
| PDE_06915 | PDT_07163 | K00002,alcohol dehydrogenase (NADP+) [EC:1.1.1.2]                   | Glycolysis / Gluconeogenesis;Glycerolipid metabolism;Caprolactam degradation                                                                                                                  | 35.36  | 9.35  |     |
| PDE_06939 | PDT_07189 | K03885,NADH dehydrogenase [EC:1.6.99.3]                             | Oxidative phosphorylation                                                                                                                                                                     | 64.26  | 17.05 |     |
| PDE_06955 | PDT_07207 | -                                                                   | -                                                                                                                                                                                             | 198.56 | 0.55  |     |
| PDE_06972 | PDT_07226 | K00517,E1.14.-.-                                                    | Bisphenol degradation;Polycyclic aromatic hydrocarbon degradation;Aminobenzoate degradation;Limonene and pinene degradation;Stilbenoid, diarylheptanoid and gingerol biosynthesis             | 110.84 | 28.33 |     |

|           |           |                                                                           |                                                                                                                                                                                   |        |       |     |
|-----------|-----------|---------------------------------------------------------------------------|-----------------------------------------------------------------------------------------------------------------------------------------------------------------------------------|--------|-------|-----|
| PDE_07139 | PDT_07394 | K00517,E1.14.-.-                                                          | Bisphenol degradation;Polycyclic aromatic hydrocarbon degradation;Aminobenzoate degradation;Limonene and pinene degradation;Stilbenoid, diarylheptanoid and gingerol biosynthesis | 231.2  | 42.08 |     |
| PDE_07206 | PDT_07462 | K00517,E1.14.-.-                                                          | Bisphenol degradation;Polycyclic aromatic hydrocarbon degradation;Aminobenzoate degradation;Limonene and pinene degradation;Stilbenoid, diarylheptanoid and gingerol biosynthesis | 399.5  | 1.93  |     |
| PDE_07207 | PDT_07463 | K00517,E1.14.-.-                                                          | Bisphenol degradation;Polycyclic aromatic hydrocarbon degradation;Aminobenzoate degradation;Limonene and pinene degradation;Stilbenoid, diarylheptanoid and gingerol biosynthesis | 60.86  | 10.45 |     |
| PDE_07208 | PDT_07464 | K00540,E1.-.-.-                                                           | -                                                                                                                                                                                 | 53.04  | 9.35  |     |
| PDE_07226 | PDT_07482 | K03379,cyclohexanone monooxygenase [EC:1.14.13.22]                        | Caprolactam degradation                                                                                                                                                           | 35.02  | 1.65  |     |
| PDE_07232 | PDT_07488 | K00108,choline dehydrogenase [EC:1.1.99.1]                                | Glycine, serine and threonine metabolism                                                                                                                                          | 53.38  | 9.08  | Yes |
| PDE_07246 | PDT_07502 | K00457,4-hydroxyphenylpyruvate dioxygenase [EC:1.13.11.27]                | Ubiquinone and other terpenoid-quinone biosynthesis;Tyrosine metabolism;Phenylalanine metabolism                                                                                  | 13.6   | 0     | Yes |
| PDE_07272 | PDT_07529 | K00100,E1.1.1.-                                                           | Fructose and mannose metabolism;Bisphenol degradation;Linoleic acid metabolism;Chloroalkane and chloroalkene degradation;Butanoate metabolism                                     | 45.9   | 7.15  |     |
| PDE_07286 | PDT_07543 | K00411,ubiquinol-cytochrome c reductase iron-sulfur subunit [EC:1.10.2.2] | Oxidative phosphorylation;Nitrogen metabolism;Two-component system;Cardiac muscle contraction;Alzheimer's disease;Parkinson's disease;Huntington's disease                        | 231.54 | 99.02 |     |
| PDE_07439 | PDT_07701 | K06892,unclassified                                                       | -                                                                                                                                                                                 | 32.64  | 7.98  |     |
| PDE_07692 | PDT_07959 | K00100,E1.1.1.-                                                           | Fructose and mannose metabolism;Bisphenol degradation;Linoleic acid metabolism;Chloroalkane and chloroalkene degradation;Butanoate metabolism                                     | 53.72  | 3.03  |     |



|           |           |                                                                                      |                                                                                                                                                                                                                                                                                                                                                                                                                                                              |        |        |     |
|-----------|-----------|--------------------------------------------------------------------------------------|--------------------------------------------------------------------------------------------------------------------------------------------------------------------------------------------------------------------------------------------------------------------------------------------------------------------------------------------------------------------------------------------------------------------------------------------------------------|--------|--------|-----|
| PDE_07852 | PDT_08119 | -                                                                                    | -                                                                                                                                                                                                                                                                                                                                                                                                                                                            | 81.94  | 14.85  |     |
| PDE_07956 | PDT_08224 | K00480,salicylate hydroxylase<br>[EC:1.14.13.1]                                      | Dioxin degradation;Polycyclic aromatic hydrocarbon<br>degradation;Naphthalene degradation                                                                                                                                                                                                                                                                                                                                                                    | 144.16 | 0      |     |
| PDE_07957 | PDT_08225 | K00128,aldehyde dehydrogenase<br>(NAD+) [EC:1.2.1.3]                                 | Glycolysis / Gluconeogenesis;Pentose and glucuronate<br>interconversions;Ascorbate and aldarate metabolism;Fatty acid<br>metabolism;Valine, leucine and isoleucine degradation;Lysine<br>degradation;Arginine and proline metabolism;Histidine<br>metabolism;Tryptophan metabolism;beta-Alanine metabolism;Glycerolipid<br>metabolism;Pyruvate metabolism;Chloroalkane and chloroalkene<br>degradation;Propanoate metabolism;Limonene and pinene degradation | 571.2  | 252.78 | Yes |
| PDE_08009 | PDT_08278 | K00257,E1.3.99.-                                                                     | Geraniol degradation                                                                                                                                                                                                                                                                                                                                                                                                                                         | 183.6  | 49.51  |     |
| PDE_08042 | PDT_08306 | -                                                                                    | -                                                                                                                                                                                                                                                                                                                                                                                                                                                            | 137.7  | 10.73  |     |
| PDE_08098 | PDT_08364 | K00435,peroxiredoxin [EC:1.11.1.-]                                                   | -                                                                                                                                                                                                                                                                                                                                                                                                                                                            | 15.3   | 0      |     |
| PDE_08156 | PDT_08424 | -                                                                                    | -                                                                                                                                                                                                                                                                                                                                                                                                                                                            | 559.3  | 153.21 |     |
| PDE_08495 | PDT_08774 | K00321,E1.5.99.-                                                                     | -                                                                                                                                                                                                                                                                                                                                                                                                                                                            | 190.06 | 38.23  |     |
| PDE_08630 | PDT_08912 | K00140,methylmalonate-semialdehyde<br>dehydrogenase [EC:1.2.1.27]                    | Valine, leucine and isoleucine degradation;beta-Alanine<br>metabolism;Inositol phosphate metabolism;Propanoate metabolism                                                                                                                                                                                                                                                                                                                                    | 341.36 | 41.26  | Yes |
| PDE_08660 | PDT_08945 | K00517,E1.14.-.-                                                                     | Bisphenol degradation;Polycyclic aromatic hydrocarbon<br>degradation;Aminobenzoate degradation;Limonene and pinene<br>degradation;Stilbenoid, diarylheptanoid and gingerol biosynthesis                                                                                                                                                                                                                                                                      | 148.92 | 35.21  |     |
| PDE_08806 | PDT_09097 | K00166,2-oxoisovalerate<br>dehydrogenase E1 component, alpha<br>subunit [EC:1.2.4.4] | Valine, leucine and isoleucine degradation                                                                                                                                                                                                                                                                                                                                                                                                                   | 110.16 | 14.85  | Yes |
| PDE_08814 | PDT_09105 | K00294,1-pyrroline-5-carboxylate<br>dehydrogenase [EC:1.5.1.12]                      | Alanine, aspartate and glutamate metabolism;Arginine and proline<br>metabolism                                                                                                                                                                                                                                                                                                                                                                               | 96.22  | 26.41  | Yes |
| PDE_08821 | PDT_09112 | K00517,E1.14.-.-                                                                     | Bisphenol degradation;Polycyclic aromatic hydrocarbon                                                                                                                                                                                                                                                                                                                                                                                                        | 94.18  | 39.88  |     |

|           |           |                                                                               |                                                                                                                                       |        |        |     |
|-----------|-----------|-------------------------------------------------------------------------------|---------------------------------------------------------------------------------------------------------------------------------------|--------|--------|-----|
|           |           |                                                                               | degradation;Aminobenzoate degradation;Limonene and pinene degradation;Stilbenoid, diarylheptanoid and gingerol biosynthesis           |        |        |     |
| PDE_08847 | PDT_09138 | K00387,sulfite oxidase [EC:1.8.3.1]                                           | Sulfur metabolism                                                                                                                     | 20.06  | 0      |     |
| PDE_08849 | PDT_09140 | K00540,E1.-.-                                                                 | -                                                                                                                                     | 913.58 | 58.04  |     |
| PDE_08859 | PDT_09150 | K00033,6-phosphogluconate dehydrogenase [EC:1.1.1.44]                         | Pentose phosphate pathway;Glutathione metabolism                                                                                      | 484.84 | 118.55 |     |
| PDE_08904 | PDT_09197 | K00457,4-hydroxyphenylpyruvate dioxygenase [EC:1.13.11.27]                    | Ubiquinone and other terpenoid-quinone biosynthesis;Tyrosine metabolism;Phenylalanine metabolism                                      | 149.26 | 60.51  | Yes |
| PDE_08966 | PDT_09259 | -                                                                             | -                                                                                                                                     | 120.02 | 52.26  |     |
| PDE_09027 | PDT_09321 | K03379,cyclohexanone monooxygenase [EC:1.14.13.22]                            | Caprolactam degradation                                                                                                               | 332.18 | 21.73  |     |
| PDE_09047 | PDT_09341 | K00167,2-oxoisovalerate dehydrogenase E1 component, beta subunit [EC:1.2.4.4] | Valine, leucine and isoleucine degradation                                                                                            | 73.1   | 12.93  | Yes |
| PDE_09194 | PDT_09494 | -                                                                             | -                                                                                                                                     | 48.62  | 12.93  |     |
| PDE_09229 | PDT_09530 | K00480,salicylate hydroxylase [EC:1.14.13.1]                                  | Dioxin degradation;Polycyclic aromatic hydrocarbon degradation;Naphthalene degradation                                                | 29.92  | 0.55   |     |
| PDE_09230 | PDT_09531 | K05917,cytochrome P450, family 51 (sterol 14-demethylase) [EC:1.14.13.70]     | Steroid biosynthesis                                                                                                                  | 24.82  | 3.58   |     |
| PDE_09239 | PDT_09540 | K00059,3-oxoacyl-[acyl-carrier protein] reductase [EC:1.1.1.100]              | Fatty acid biosynthesis;Biosynthesis of unsaturated fatty acids                                                                       | 36.04  | 1.38   |     |
| PDE_09342 | PDT_09650 | K00249,acyl-CoA dehydrogenase [EC:1.3.99.3]                                   | Fatty acid metabolism;Valine, leucine and isoleucine degradation;beta-Alanine metabolism;Propanoate metabolism;PPAR signaling pathway | 250.92 | 16.23  | Yes |
| PDE_09367 | PDT_09677 | K00329,NADH dehydrogenase                                                     | Oxidative phosphorylation                                                                                                             | 114.24 | 0      |     |

|           |           |                                                                                  |                                                                                                                                                                                                                                              |         |       |     |
|-----------|-----------|----------------------------------------------------------------------------------|----------------------------------------------------------------------------------------------------------------------------------------------------------------------------------------------------------------------------------------------|---------|-------|-----|
|           |           | [EC:1.6.5.3]                                                                     |                                                                                                                                                                                                                                              |         |       |     |
| PDE_09380 | PDT_09690 | -                                                                                | -                                                                                                                                                                                                                                            | 81.6    | 4.95  |     |
| PDE_09453 | PDT_09764 | K05909,E1.10.3.2                                                                 | -                                                                                                                                                                                                                                            | 83.98   | 4.4   |     |
| PDE_09492 | PDT_09803 | K05909,E1.10.3.2                                                                 | -                                                                                                                                                                                                                                            | 122.4   | 0.83  |     |
| PDE_09616 | PDT_09929 | K00120,E1.1.-.-                                                                  | Bisphenol degradation;Polycyclic aromatic hydrocarbon degradation;Chloroalkane and chloroalkene degradation;Naphthalene degradation;Aminobenzoate degradation;Limonene and pinene degradation                                                | 106.76  | 0.55  |     |
| PDE_09681 | PDT_09993 | K13237,peroxisomal 2,4-dienoyl-CoA reductase [EC:1.3.1.34]                       | Peroxisome                                                                                                                                                                                                                                   | 87.04   | 2.48  |     |
| PDE_09691 | PDT_10003 | K03959,NADH dehydrogenase (ubiquinone) 1 beta subcomplex 3 [EC:1.6.5.3 1.6.99.3] | Oxidative phosphorylation;Alzheimer's disease;Parkinson's disease;Huntington's disease                                                                                                                                                       | 42.16   | 8.8   |     |
| PDE_09693 | PDT_10005 | K00276,primary-amine oxidase [EC:1.4.3.21]                                       | Glycine, serine and threonine metabolism;Tyrosine metabolism;Phenylalanine metabolism;beta-Alanine metabolism;Isoquinoline alkaloid biosynthesis;Tropane, piperidine and pyridine alkaloid biosynthesis                                      | 148.24  | 7.15  | Yes |
| PDE_09714 | PDT_10027 | K03671,thioredoxin 1                                                             | -                                                                                                                                                                                                                                            | 122.74  | 8.25  |     |
| PDE_09748 | PDT_10060 | -                                                                                | -                                                                                                                                                                                                                                            | 210.46  | 1.1   |     |
| PDE_09758 | PDT_10070 | K00492,E1.14.13.-                                                                | Histidine metabolism;Chlorocyclohexane and chlorobenzene degradation;Bisphenol degradation;Toluene degradation;Polycyclic aromatic hydrocarbon degradation;Naphthalene degradation;Aminobenzoate degradation;Limonene and pinene degradation | 526.32  | 29.98 | Yes |
| PDE_09761 | PDT_10073 | K00457,4-hydroxyphenylpyruvate dioxygenase [EC:1.13.11.27]                       | Ubiquinone and other terpenoid-quinone biosynthesis;Tyrosine metabolism;Phenylalanine metabolism                                                                                                                                             | 2216.12 | 36.31 | Yes |
| PDE_09762 | PDT_10074 | K00101,L-lactate dehydrogenase (cytochrome) [EC:1.1.2.3]                         | Pyruvate metabolism                                                                                                                                                                                                                          | 370.94  | 97.92 |     |

|           |           |                                                         |                                                                                                                                                                                         |        |        |  |
|-----------|-----------|---------------------------------------------------------|-----------------------------------------------------------------------------------------------------------------------------------------------------------------------------------------|--------|--------|--|
| PDE_09770 | PDT_10082 | -                                                       | -                                                                                                                                                                                       | 83.64  | 33.01  |  |
| PDE_09870 | PDT_10184 | K00323,NAD(P) transhydrogenase<br>[EC:1.6.1.2]          | Nicotinate and nicotinamide metabolism                                                                                                                                                  | 375.36 | 182.37 |  |
| PDE_09933 | PDT_10248 | -                                                       | -                                                                                                                                                                                       | 16.66  | 0.55   |  |
| PDE_09999 | PDT_10315 | K00480,salicylate hydroxylase<br>[EC:1.14.13.1]         | Dioxin degradation;Polycyclic aromatic hydrocarbon<br>degradation;Naphthalene degradation                                                                                               | 109.14 | 0      |  |
| PDE_10002 | PDT_10318 | K00019,3-hydroxybutyrate<br>dehydrogenase [EC:1.1.1.30] | Synthesis and degradation of ketone bodies;Butanoate metabolism                                                                                                                         | 54.06  | 0      |  |
| PDE_10003 | PDT_10319 | K00517,E1.14.-.-                                        | Bisphenol degradation;Polycyclic aromatic hydrocarbon<br>degradation;Aminobenzoate degradation;Limonene and pinene<br>degradation;Stilbenoid, diarylheptanoid and gingerol biosynthesis | 24.82  | 0      |  |
| PDE_10004 | PDT_10320 | -                                                       | -                                                                                                                                                                                       | 62.22  | 1.1    |  |
| PDE_10008 | PDT_10324 | -                                                       | -                                                                                                                                                                                       | 13.6   | 0      |  |

**Table S14.** Transcription levels of secondary metabolism gene clusters in *P. decumbens* 114-2 and JU-A10-T.

NRPS, Nonribosomal peptide synthetases; DMAT, Demethylallyl tryptophan synthase; PKS, Polyketide synthases.

| Gene ID          |           | SMURF<br>"backbone<br>gene"<br>prediction | Transcription level (tags per million, TPM) |          | Change <sup>a</sup> |
|------------------|-----------|-------------------------------------------|---------------------------------------------|----------|---------------------|
| 114-2            | JU-A10-T  |                                           | 114-2                                       | JU-A10-T |                     |
| <b>Cluster_1</b> |           |                                           |                                             |          |                     |
| PDE_00814        | PDT_00847 |                                           | 3.06                                        | 9.9      |                     |
| PDE_00813        | PDT_00846 |                                           | 1.36                                        | 4.95     |                     |
| PDE_00812        | PDT_00845 |                                           | 0.68                                        | 0        |                     |
| PDE_00811        | PDT_00844 |                                           | 41.82                                       | 0.55     | Down                |
| PDE_00810        | PDT_00843 | NRPS                                      | 6.46                                        | 0.83     |                     |
| PDE_00809        | PDT_00842 |                                           | 18.7                                        | 0        | Down                |
| PDE_00808        | PDT_00841 |                                           | 10.2                                        | 0        |                     |
| PDE_00807        | PDT_00840 | DMAT                                      | 47.94                                       | 0        | Down                |
| PDE_00806        | PDT_00839 |                                           | 55.76                                       | 0.55     | Down                |
| PDE_00805        | PDT_00838 |                                           | 28.56                                       | 0        | Down                |
| PDE_00804        | PDT_00837 |                                           | 58.82                                       | 0        | Down                |
| PDE_00803        | PDT_00836 |                                           | 35.02                                       | 0        | Down                |
| PDE_00802        | PDT_00835 |                                           | 7.14                                        | 0        |                     |
| PDE_00801        | PDT_00834 |                                           | 68.34                                       | 0        | Down                |
| PDE_00800        | PDT_00833 |                                           | 11.22                                       | 0        |                     |
| PDE_00799        | PDT_00832 |                                           | 103.36                                      | 7.43     | Down                |
| PDE_00798        | PDT_00831 |                                           | 113.9                                       | 1.38     | Down                |
| PDE_00797        | PDT_00830 | DMAT                                      | 361.42                                      | 0.55     | Down                |
| PDE_00796        | PDT_00829 |                                           | 30.94                                       | 0        | Down                |
| PDE_00795        | PDT_00828 |                                           | 22.78                                       | 0        | Down                |
| PDE_00794        | PDT_00827 |                                           | 148.58                                      | 0        | Down                |
| PDE_00793        | PDT_00826 | NRPS                                      | 4.42                                        | 2.75     |                     |
| PDE_00792        | PDT_00825 |                                           | 51                                          | 0        | Down                |
| PDE_00791        | PDT_00824 |                                           | 19.04                                       | 0        | Down                |
| PDE_00790        | PDT_00823 |                                           | 56.44                                       | 2.75     | Down                |
| PDE_00789        | PDT_00822 | NRPS                                      | 4.08                                        | 0        |                     |
| PDE_00788        | PDT_00821 |                                           | 22.78                                       | 0        | Down                |
| PDE_00787        | PDT_00820 |                                           | 116.96                                      | 31.91    | Down                |
| <b>Cluster_2</b> |           |                                           |                                             |          |                     |
| PDE_01077        | PDT_01119 | NRPS                                      | 0                                           | 0        |                     |
| PDE_01076        | PDT_01118 |                                           | 0                                           | 0        |                     |
| PDE_01075        | PDT_01117 |                                           | 0                                           | 0        |                     |

|                  |           |           |        |        |      |
|------------------|-----------|-----------|--------|--------|------|
| PDE_01074        | PDT_01116 |           | 0.68   | 0      |      |
| PDE_01073        | PDT_01115 |           | 3.4    | 0      |      |
| PDE_01072        | PDT_01114 |           | 0      | 0      |      |
| PDE_01071        | PDT_01113 | NRPS      | 24.48  | 0.55   | Down |
| PDE_01070        | PDT_01112 |           | 34.68  | 0      | Down |
| PDE_01069        | PDT_01111 |           | 62.56  | 0      | Down |
| PDE_01068        | PDT_01110 |           | 129.54 | 3.3    | Down |
| PDE_01067        | PDT_01109 |           | 93.16  | 1.1    | Down |
| PDE_01066        | PDT_01108 | DMAT      | 60.18  | 0.83   | Down |
| PDE_01065        | PDT_01107 |           | 161.84 | 0.83   | Down |
| PDE_01064        | PDT_01106 |           | 27.54  | 0      | Down |
|                  |           |           |        |        |      |
| <b>Cluster_3</b> |           |           |        |        |      |
| PDE_01177        | PDT_01230 |           | 4.42   | 2.75   |      |
| PDE_01176        | PDT_01229 |           | 0.68   | 18.15  | Up   |
| PDE_01175        | PDT_01227 |           | 79.56  | 67.67  |      |
| PDE_01174        | PDT_01226 |           | 11.9   | 8.53   |      |
| PDE_01173        | PDT_01225 | PKS-Like  | 11.9   | 16.5   |      |
| PDE_01172        | PDT_01224 |           | 0      | 0      |      |
| PDE_01171        | PDT_01223 |           | 10.88  | 22.56  |      |
| PDE_01170        | PDT_01222 |           | 13.94  | 19.25  |      |
| PDE_01169        | PDT_01221 |           | 0      | 0      |      |
| PDE_01168        | PDT_01220 |           | 214.54 | 14.3   | Down |
| PDE_01167        | PDT_01219 |           | 12.58  | 13.75  |      |
| PDE_01166        | PDT_01218 |           | 74.46  | 102.05 |      |
|                  |           |           |        |        |      |
| <b>Cluster_4</b> |           |           |        |        |      |
| PDE_01198        | PDT_01255 |           | 24.48  | 44.84  |      |
| PDE_01197        | PDT_01254 |           | 0      | 0      |      |
| PDE_01196        | PDT_01253 |           | 60.86  | 7.43   | Down |
| PDE_01195        | PDT_01252 |           | 229.5  | 1.38   | Down |
| PDE_01194        | PDT_01251 |           | 915.96 | 81.69  | Down |
| PDE_01193        | PDT_01250 |           | 6.46   | 0      |      |
| PDE_01192        | PDT_01249 |           | 161.84 | 0      | Down |
| PDE_01191        | PDT_01248 |           | 231.88 | 437.9  |      |
| PDE_01190        | PDT_01247 |           | 89.08  | 187.32 | Up   |
| PDE_01189        | PDT_01246 |           | 114.24 | 3.03   | Down |
| PDE_01188        | PDT_01245 |           | 761.94 | 10.45  | Down |
| PDE_01187        | PDT_01244 |           | 286.62 | 15.68  | Down |
| PDE_01186        | PDT_01243 |           | 9.86   | 9.9    |      |
| PDE_01185        | PDT_01242 | NRPS-Like | 5.1    | 0      |      |
|                  |           |           |        |        |      |
| <b>Cluster_5</b> |           |           |        |        |      |

|                  |           |      |        |       |      |
|------------------|-----------|------|--------|-------|------|
| PDE_01218        | PDT_01276 |      | 290.36 | 10.18 | Down |
| PDE_01217        | PDT_01275 |      | 608.6  | 0     | Down |
| PDE_01216        | PDT_01274 |      | 127.84 | 0.55  | Down |
| PDE_01215        | PDT_01273 |      | 632.74 | 6.88  | Down |
| PDE_01214        | PDT_01272 |      | 179.86 | 3.3   | Down |
| PDE_01213        | PDT_01271 |      | 49.64  | 0     | Down |
| PDE_01212        | PDT_01270 | NRPS | 172.72 | 10.45 | Down |
| PDE_01211        | PDT_01269 |      | 50.32  | 32.73 |      |
| PDE_01210        | PDT_01268 |      | 0      | 0     |      |
| PDE_01209        | PDT_01267 |      | 0      | 4.68  |      |
| PDE_01208        | PDT_01266 |      | 1.36   | 1.65  |      |
| PDE_01207        | PDT_01265 |      | 18.36  | 40.98 |      |
| PDE_01206        | PDT_01264 |      | 66.3   | 314.4 | Up   |
| PDE_01205        | PDT_01263 |      | 0      | 0     |      |
| PDE_01204        | PDT_01262 |      | 0      | 0     |      |
| PDE_01203        | PDT_01261 |      | 0      | 0     |      |
| PDE_01202        | PDT_01260 |      | 10.2   | 7.7   |      |
|                  |           |      |        |       |      |
| <b>Cluster_6</b> |           |      |        |       |      |
| PDE_01242        | PDT_01300 |      | 0      | 0     |      |
| PDE_01241        | PDT_01299 |      | 2.72   | 1.65  |      |
| PDE_01240        | PDT_01298 |      | 27.88  | 7.98  |      |
| PDE_01239        | PDT_01297 |      | 4.42   | 3.85  |      |
| PDE_01238        | PDT_01296 |      | 21.76  | 2.2   | Down |
| PDE_01237        | PDT_01295 |      | 5.78   | 0.55  |      |
| PDE_01236        | PDT_01294 |      | 1.02   | 13.75 |      |
| PDE_01235        | PDT_01293 | PKS  | 13.6   | 2.2   |      |
| PDE_01234        | PDT_01292 |      | 38.76  | 5.5   | Down |
| PDE_01233        | PDT_01291 |      | 0.68   | 1.38  |      |
| PDE_01232        | PDT_01290 |      | 38.08  | 32.73 |      |
| PDE_01231        | PDT_01289 |      | 55.08  | 4.4   | Down |
| PDE_01230        | PDT_01288 |      | 20.4   | 10.45 |      |
|                  |           |      |        |       |      |
| <b>Cluster_7</b> |           |      |        |       |      |
| PDE_01433        | PDT_01511 |      | 3.4    | 0     |      |
| PDE_01432        | PDT_01510 | NRPS | 0      | 0.55  |      |
| PDE_01431        | PDT_01509 |      | 1.7    | 1.1   |      |
| PDE_01430        | PDT_01508 |      | 0      | 0     |      |
| PDE_01429        | PDT_01507 |      | 0.68   | 0     |      |
| PDE_01428        | PDT_01506 |      | 0      | 5.78  |      |
| PDE_01427        | PDT_01505 |      | 0      | 0     |      |
| PDE_01426        | PDT_01504 |      | 2.72   | 1.1   |      |
| PDE_01425        | PDT_01503 |      | 6.12   | 0.83  |      |

|                   |           |           |        |       |      |
|-------------------|-----------|-----------|--------|-------|------|
| PDE_01424         | PDT_01502 |           | 132.94 | 5.5   | Down |
| PDE_01423         | PDT_01501 |           | 0      | 0     |      |
| PDE_01422         | PDT_01500 |           | 2.04   | 17.33 |      |
| PDE_01421         | PDT_01499 |           | 2.38   | 4.13  |      |
| PDE_01420         | PDT_01498 |           | 17     | 16.23 |      |
| PDE_01419         | PDT_01497 |           | 8.84   | 4.13  |      |
| PDE_01418         | PDT_01496 |           | 44.54  | 3.85  | Down |
|                   |           |           |        |       |      |
| <b>Cluster_8</b>  |           |           |        |       |      |
| PDE_02141         | PDT_02237 | PKS       | 12.92  | 1.38  |      |
| PDE_02140         | PDT_02236 |           | 19.04  | 0     | Down |
| PDE_02139         | PDT_02235 |           | 18.36  | 0     | Down |
| PDE_02138         | PDT_02234 |           | 5.1    | 0     |      |
| PDE_02137         | PDT_02233 |           | 5.44   | 0.55  |      |
| PDE_02136         | PDT_02232 |           | 9.52   | 0.55  |      |
| PDE_02135         | PDT_02231 |           | 4.42   | 0.83  |      |
| PDE_02134         | PDT_02230 |           | 2.04   | 3.3   |      |
| PDE_02133         | PDT_02229 |           | 57.46  | 57.49 |      |
| PDE_02132         | PDT_02228 |           | 2.04   | 0.83  |      |
| PDE_02131         | PDT_02227 | NRPS      | 7.82   | 3.85  |      |
| PDE_02130         | PDT_02226 |           | 0.68   | 0     |      |
|                   |           |           |        |       |      |
| <b>Cluster_9</b>  |           |           |        |       |      |
| PDE_02204         | PDT_02302 |           | 3.74   | 0     |      |
| PDE_02203         | PDT_02301 | NRPS-Like | 1.36   | 0     |      |
|                   |           |           |        |       |      |
| <b>Cluster_10</b> |           |           |        |       |      |
| PDE_02610         | PDT_02746 | NRPS      | 4.42   | 18.15 |      |
| PDE_02609         | PDT_02745 |           | 11.9   | 6.88  |      |
| PDE_02608         | PDT_02744 |           | 0      | 0     |      |
| PDE_02607         | PDT_02743 |           | 20.4   | 3.58  |      |
| PDE_02606         | PDT_02742 |           | 15.98  | 11.28 |      |
| PDE_02605         | PDT_02741 |           | 78.54  | 8.25  | Down |
| PDE_02604         | PDT_02740 |           | 8.5    | 7.43  |      |
| PDE_02603         | PDT_02739 |           | 76.5   | 44.56 |      |
| PDE_02602         | PDT_02738 |           | 39.78  | 25.58 |      |
| PDE_02601         | PDT_02737 |           | 78.2   | 31.91 | Down |
| PDE_02600         | PDT_02736 |           | 78.88  | 75.09 |      |
|                   |           |           |        |       |      |
| <b>Cluster_11</b> |           |           |        |       |      |
| PDE_03304         | PDT_03485 | NRPS-Like | 1.7    | 3.3   |      |
| PDE_03303         | PDT_03484 |           | 0      | 0     |      |
| PDE_03302         | PDT_03483 |           | 36.38  | 40.43 |      |
| PDE_03301         | PDT_03482 |           | 28.56  | 32.73 |      |



|                   |           |        |        |        |      |
|-------------------|-----------|--------|--------|--------|------|
| PDE_03300         | PDT_03481 |        | 1.7    | 3.03   |      |
| PDE_03299         | PDT_03480 |        | 129.88 | 48.41  | Down |
| PDE_03298         | PDT_03479 |        | 145.18 | 13.48  | Down |
|                   |           |        |        |        |      |
| <b>Cluster_12</b> |           |        |        |        |      |
| PDE_03416         | PDT_03609 | NRPS   | 0      | 0.55   |      |
| PDE_03415         | PDT_03608 |        | 0      | 0.55   |      |
|                   |           |        |        |        |      |
| <b>Cluster_13</b> |           |        |        |        |      |
| PDE_03455         | PDT_03651 | PKS    | 17.68  | 7.7    |      |
| PDE_03454         | PDT_03650 |        | 34     | 4.4    | Down |
| PDE_03453         | PDT_03649 |        | 63.24  | 1.1    | Down |
|                   |           |        |        |        |      |
| <b>Cluster_14</b> |           |        |        |        |      |
| PDE_03929         | PDT_04154 |        | 1.02   | 6.88   |      |
| PDE_03928         | PDT_04153 |        | 33.32  | 821.89 | Up   |
| PDE_03927         | PDT_04152 |        | 45.56  | 157.61 | Up   |
| PDE_03926         | PDT_04151 | PKS    | 12.92  | 359.51 | Up   |
| PDE_03925         | PDT_04150 |        | 25.5   | 23.38  |      |
| PDE_03924         | PDT_04149 |        | 11.9   | 0      |      |
| PDE_03923         | PDT_04148 |        | 0      | 0      |      |
| PDE_03922         | PDT_04147 |        | 1.7    | 0      |      |
| PDE_03921         | PDT_04146 |        | 59.5   | 57.49  |      |
| PDE_03920         | PDT_04145 |        | 211.14 | 228.85 |      |
|                   |           |        |        |        |      |
| <b>Cluster_15</b> |           |        |        |        |      |
| PDE_04025         | PDT_04228 |        | 20.4   | 0      | Down |
| PDE_04024         | PDT_04227 |        | 79.9   | 1.1    | Down |
| PDE_04023         | PDT_04226 |        | 166.26 | 14.03  | Down |
| PDE_04022         | PDT_04225 |        | 13.6   | 11.83  |      |
| PDE_04021         | PDT_04224 |        | 354.62 | 255.81 |      |
| PDE_04020         | PDT_04223 |        | 101.32 | 17.05  | Down |
| PDE_04019         | PDT_04222 |        | 9.52   | 0      |      |
| PDE_04018         | PDT_04221 | PKS    | 40.12  | 13.2   |      |
| PDE_04017         | PDT_04220 | HYBRID | 257.72 | 2.48   | Down |
| PDE_04016         | PDT_04219 |        | 127.84 | 0      | Down |
| PDE_04015         | PDT_04218 |        | 82.28  | 0.55   | Down |
| PDE_04014         | PDT_04217 |        | 6.46   | 6.33   |      |
| PDE_04013         | PDT_04216 |        | 10.2   | 2.48   |      |
| PDE_04012         | PDT_04215 |        | 43.18  | 35.48  |      |
| PDE_04011         | PDT_04214 |        | 0      | 0      |      |
| PDE_04010         | PDT_04213 |        | 0      | 0      |      |
| PDE_04009         | PDT_04212 |        | 991.44 | 7.15   | Down |
| PDE_04008         | PDT_04211 |        | 209.44 | 0.83   | Down |

|                   |           |           |        |        |      |
|-------------------|-----------|-----------|--------|--------|------|
|                   |           |           |        |        |      |
| <b>Cluster_16</b> |           |           |        |        |      |
| PDE_04267         | PDT_04471 |           | 138.72 | 97.1   |      |
| PDE_04266         | PDT_04470 |           | 163.2  | 22.01  | Down |
| PDE_04265         | PDT_04469 |           | 284.58 | 60.79  | Down |
| PDE_04264         | PDT_04467 |           | 135.66 | 34.93  | Down |
| PDE_04263         | PDT_04466 |           | 67.32  | 32.73  |      |
| PDE_04262         | PDT_04465 |           | 0.68   | 0      |      |
| PDE_04261         | PDT_04464 |           | 0      | 0      |      |
| PDE_04260         | PDT_04463 |           | 113.56 | 1.38   | Down |
| PDE_04259         | PDT_04462 |           | 2.38   | 0      |      |
| PDE_04258         | PDT_04461 |           | 7.14   | 2.48   |      |
| PDE_04257         | PDT_04460 |           | 0      | 0      |      |
| PDE_04256         | PDT_04459 |           | 0      | 0      |      |
| PDE_04255         | PDT_04458 |           | 1.36   | 0      |      |
| PDE_04254         | PDT_04457 |           | 32.3   | -      |      |
| PDE_04253         | PDT_04457 |           | 10.88  | -      |      |
| PDE_04252         | PDT_04456 | HYBRID    | 10.88  | 2.2    |      |
|                   |           |           |        |        |      |
| <b>Cluster_17</b> |           |           |        |        |      |
| PDE_04545         | PDT_04746 |           | 1.7    | 0      |      |
| PDE_04544         | PDT_04745 |           | 2.04   | 1.38   |      |
| PDE_04543         | PDT_04744 | NRPS      | 0      | 0      |      |
| PDE_04542         | PDT_04743 |           | 19.04  | 20.63  |      |
| PDE_04541         | PDT_04742 |           | 37.06  | 56.66  |      |
| PDE_04540         | PDT_04741 |           | 7.48   | 27.51  | Up   |
|                   |           |           |        |        |      |
| <b>Cluster_18</b> |           |           |        |        |      |
| PDE_05569         | PDT_05803 |           | 73.78  | 31.91  | Down |
| PDE_05568         | PDT_05802 |           | 122.4  | 101.5  |      |
| PDE_05567         | PDT_05801 |           | 0.68   | 0      |      |
| PDE_05566         | PDT_05800 |           | 593.3  | 199.42 |      |
| PDE_05565         | PDT_05799 |           | 37.74  | 94.07  | Up   |
| PDE_05564         | PDT_05798 | NRPS-Like | 9.18   | 16.23  |      |
| PDE_05563         | PDT_05797 |           | 9.86   | 5.23   |      |
| PDE_05562         | PDT_05796 |           | 0      | 0      |      |
| PDE_05561         | PDT_05795 |           | 22.44  | 39.06  |      |
| PDE_05560         | PDT_05794 |           | 12.58  | 3.03   |      |
| PDE_05559         | PDT_05793 |           | 5.78   | 7.43   |      |
| PDE_05558         | PDT_05792 |           | 54.74  | 63.81  |      |
| PDE_05557         | PDT_05791 |           | 0      | 0      |      |
| PDE_05556         | PDT_05790 |           | 8.84   | 1.93   | Down |
|                   |           |           |        |        |      |
| <b>Cluster_19</b> |           |           |        |        |      |

|                   |           |           |        |        |      |
|-------------------|-----------|-----------|--------|--------|------|
| PDE_06213         | PDT_06446 |           | 81.6   | 7.98   | Down |
| PDE_06212         | PDT_06445 |           | 0      | 0      |      |
| PDE_06211         | PDT_06444 |           | 0      | 110.03 | Up   |
| PDE_06210         | PDT_06443 |           | 4.08   | 0      |      |
| PDE_06209         | PDT_06442 |           | 253.98 | 0.55   | Down |
| PDE_06208         | PDT_06441 |           | 1.36   | 0      |      |
| PDE_06207         | PDT_06440 |           | 0      | 0      |      |
| PDE_06206         | PDT_06439 | NRPS-Like | 2.04   | 2.75   |      |
| PDE_06205         | PDT_06438 |           | 0      | 0      |      |
| PDE_06204         | PDT_06437 |           | 0      | 0      |      |
| PDE_06203         | PDT_06436 |           | 1.36   | 0      |      |
| PDE_06202         | PDT_06435 |           | 0.68   | 0      |      |
|                   |           |           |        |        |      |
| <b>Cluster_20</b> |           |           |        |        |      |
| PDE_06630         | PDT_06873 | NRPS-Like | 0      | 0      |      |
| PDE_06629         | PDT_06872 |           | 0      | 0      |      |
| PDE_06628         | PDT_06871 |           | 7.14   | 1.1    |      |
| PDE_06627         | PDT_06870 |           | 1.02   | 2.75   |      |
| PDE_06626         | PDT_06869 |           | 68.34  | 165.59 | Up   |
| PDE_06625         | PDT_06868 |           | 0      | 0      |      |
| PDE_06624         | PDT_06867 |           | 36.72  | 53.09  |      |
| PDE_06623         | PDT_06866 |           | 10.2   | 7.7    |      |
|                   |           |           |        |        |      |
| <b>Cluster_21</b> |           |           |        |        |      |
| PDE_07006         | PDT_07260 |           | 25.84  | 9.08   |      |
| PDE_07005         | PDT_07259 | NRPS      | 12.58  | 1.38   |      |
| PDE_07004         | PDT_07258 |           | 10.88  | 1.1    |      |
| PDE_07003         | PDT_07257 |           | 6.12   | 0.55   |      |
| PDE_07002         | PDT_07256 |           | 5.44   | 0      |      |
| PDE_07001         | PDT_07255 |           | 35.7   | 9.08   | Down |
|                   |           |           |        |        |      |
| <b>Cluster_22</b> |           |           |        |        |      |
| PDE_07172         | PDT_07427 |           | 11.22  | 33.01  |      |
| PDE_07171         | PDT_07426 |           | 4.08   | 20.9   |      |
| PDE_07170         | PDT_07425 |           | 54.4   | 28.33  |      |
| PDE_07169         | PDT_07424 |           | 0.68   | 0.55   |      |
| PDE_07168         | PDT_07423 |           | 35.36  | 42.91  |      |
| PDE_07167         | PDT_07422 |           | 14.62  | 4.95   |      |
| PDE_07166         | PDT_07421 |           | 2.72   | 3.58   |      |
| PDE_07165         | PDT_07420 |           | 7.48   | 1.1    |      |
| PDE_07164         | PDT_07419 |           | 1.7    | 0      |      |
| PDE_07163         | PDT_07418 | NRPS      | 132.94 | 11.83  | Down |
| PDE_07162         | PDT_07417 |           | 6.12   | 89.95  | Up   |
|                   |           |           |        |        |      |

|                   |           |           |        |        |      |
|-------------------|-----------|-----------|--------|--------|------|
| <b>Cluster_23</b> |           |           |        |        |      |
| PDE_07378         | PDT_07638 |           | 37.74  | 49.51  |      |
| PDE_07377         | PDT_07637 |           | 4.42   | 12.1   |      |
| PDE_07376         | PDT_07636 |           | 0      | 0.83   |      |
| PDE_07375         | PDT_07635 |           | 11.22  | 9.35   |      |
| PDE_07374         | -         |           | 0      | -      |      |
| PDE_07373         | PDT_07633 | NRPS-Like | 58.48  | 59.14  |      |
|                   |           |           |        |        |      |
| <b>Cluster_24</b> |           |           |        |        |      |
| PDE_08155         | PDT_08423 | NRPS-Like | 284.58 | 51.99  | Down |
| PDE_08154         | PDT_08422 |           | 45.22  | 3.03   | Down |
|                   |           |           |        |        |      |
| <b>Cluster_25</b> |           |           |        |        |      |
| PDE_09202         | PDT_09503 |           | 0.68   | 0.55   |      |
| PDE_09201         | PDT_09502 |           | 1.02   | 0      |      |
| PDE_09200         | PDT_09501 |           | 5.1    | 6.6    |      |
| PDE_09199         | PDT_09500 |           | 5.1    | 0.55   |      |
| PDE_09198         | PDT_09499 | HYBRID    | 0      | 0      |      |
| PDE_09197         | PDT_09497 |           | 0.68   | 0      |      |
| PDE_09196         | PDT_09496 |           | 0.68   | 0      |      |
| PDE_09195         | PDT_09495 |           | 460.36 | 414.25 |      |
| PDE_09194         | PDT_09494 |           | 48.62  | 12.93  | Down |
| PDE_09193         | PDT_09493 |           | 1.02   | 0.83   |      |
| PDE_09192         | PDT_09492 |           | 0      | 0.55   |      |
| PDE_09191         | PDT_09491 |           | 0      | 0      |      |
| PDE_09190         | PDT_09490 |           | 1.02   | 0.55   |      |
| PDE_09189         | PDT_09489 |           | 0      | 0      |      |
| PDE_09188         | PDT_09488 |           | 0      | 0      |      |
|                   |           |           |        |        |      |
| <b>Cluster_26</b> |           |           |        |        |      |
| PDE_09243         | PDT_09544 |           | 1.02   | 0.83   |      |
| PDE_09242         | PDT_09543 |           | 96.56  | 0      | Down |
| PDE_09241         | PDT_09542 |           | 30.26  | 0      | Down |
| PDE_09240         | PDT_09541 |           | 94.18  | 0      | Down |
| PDE_09239         | PDT_09540 |           | 36.04  | 1.38   | Down |
| PDE_09238         | PDT_09539 |           | 25.16  | 0      | Down |
| PDE_09237         | PDT_09538 | PKS       | 38.08  | 0      | Down |
| PDE_09236         | PDT_09537 |           | 123.08 | 0      | Down |
| PDE_09235         | PDT_09536 |           | 16.66  | 0      | Down |
| PDE_09234         | PDT_09535 |           | 51     | 0.83   | Down |
| PDE_09233         | PDT_09534 |           | 44.2   | 0      | Down |
| PDE_09232         | PDT_09533 |           | 26.52  | 0      | Down |
| PDE_09231         | PDT_09532 |           | 11.9   | 0.55   |      |

|                   |           |     |        |       |      |
|-------------------|-----------|-----|--------|-------|------|
| PDE_09230         | PDT_09531 |     | 24.82  | 3.58  | Down |
| PDE_09229         | PDT_09530 |     | 29.92  | 0.55  | Down |
| PDE_09228         | PDT_09529 |     | 146.2  | 3.03  | Down |
| PDE_09227         | PDT_09528 |     | 96.56  | 17.05 | Down |
| <b>Cluster_27</b> |           |     |        |       |      |
| PDE_09496         | PDT_09807 |     | 1.7    | 1.38  |      |
| PDE_09495         | PDT_09806 |     | 9.86   | 6.33  |      |
| PDE_09494         | PDT_09805 |     | 20.06  | 2.48  | Down |
| PDE_09493         | PDT_09804 |     | 0      | 0     |      |
| PDE_09492         | PDT_09803 |     | 122.4  | 0.83  | Down |
| PDE_09491         | PDT_09802 | PKS | 147.56 | 1.65  | Down |
| <b>Cluster_28</b> |           |     |        |       |      |
| PDE_10009         | PDT_10325 |     | 43.86  | 0.83  | Down |
| PDE_10008         | PDT_10324 |     | 13.6   | 0     | Down |
| PDE_10007         | PDT_10323 |     | 18.36  | 3.85  |      |
| PDE_10006         | PDT_10322 | PKS | 6.46   | 0.55  |      |
| PDE_10005         | PDT_10321 |     | 155.72 | 0.55  | Down |
| PDE_10004         | PDT_10320 |     | 62.22  | 1.1   | Down |
| PDE_10003         | PDT_10319 |     | 24.82  | 0     | Down |
| PDE_10002         | PDT_10318 |     | 54.06  | 0     | Down |
| PDE_10001         | PDT_10317 |     | 11.56  | 0     |      |
| PDE_10000         | PDT_10316 |     | 20.4   | 0     | Down |
| PDE_09999         | PDT_10315 |     | 109.14 | 0     | Down |
| PDE_09998         | PDT_10314 |     | 0      | 0     |      |
| PDE_09997         | PDT_10313 |     | 0      | 0     |      |
| PDE_09996         | PDT_10312 |     | 0.68   | 0     |      |
| PDE_09995         | PDT_10311 |     | 27.2   | 12.1  |      |
| PDE_09994         | PDT_10310 |     | 299.88 | 55.56 | Down |

<sup>a</sup> Significantly differential expression in JU-A10-T relative to 114-2 (FDR lower than 0.001).

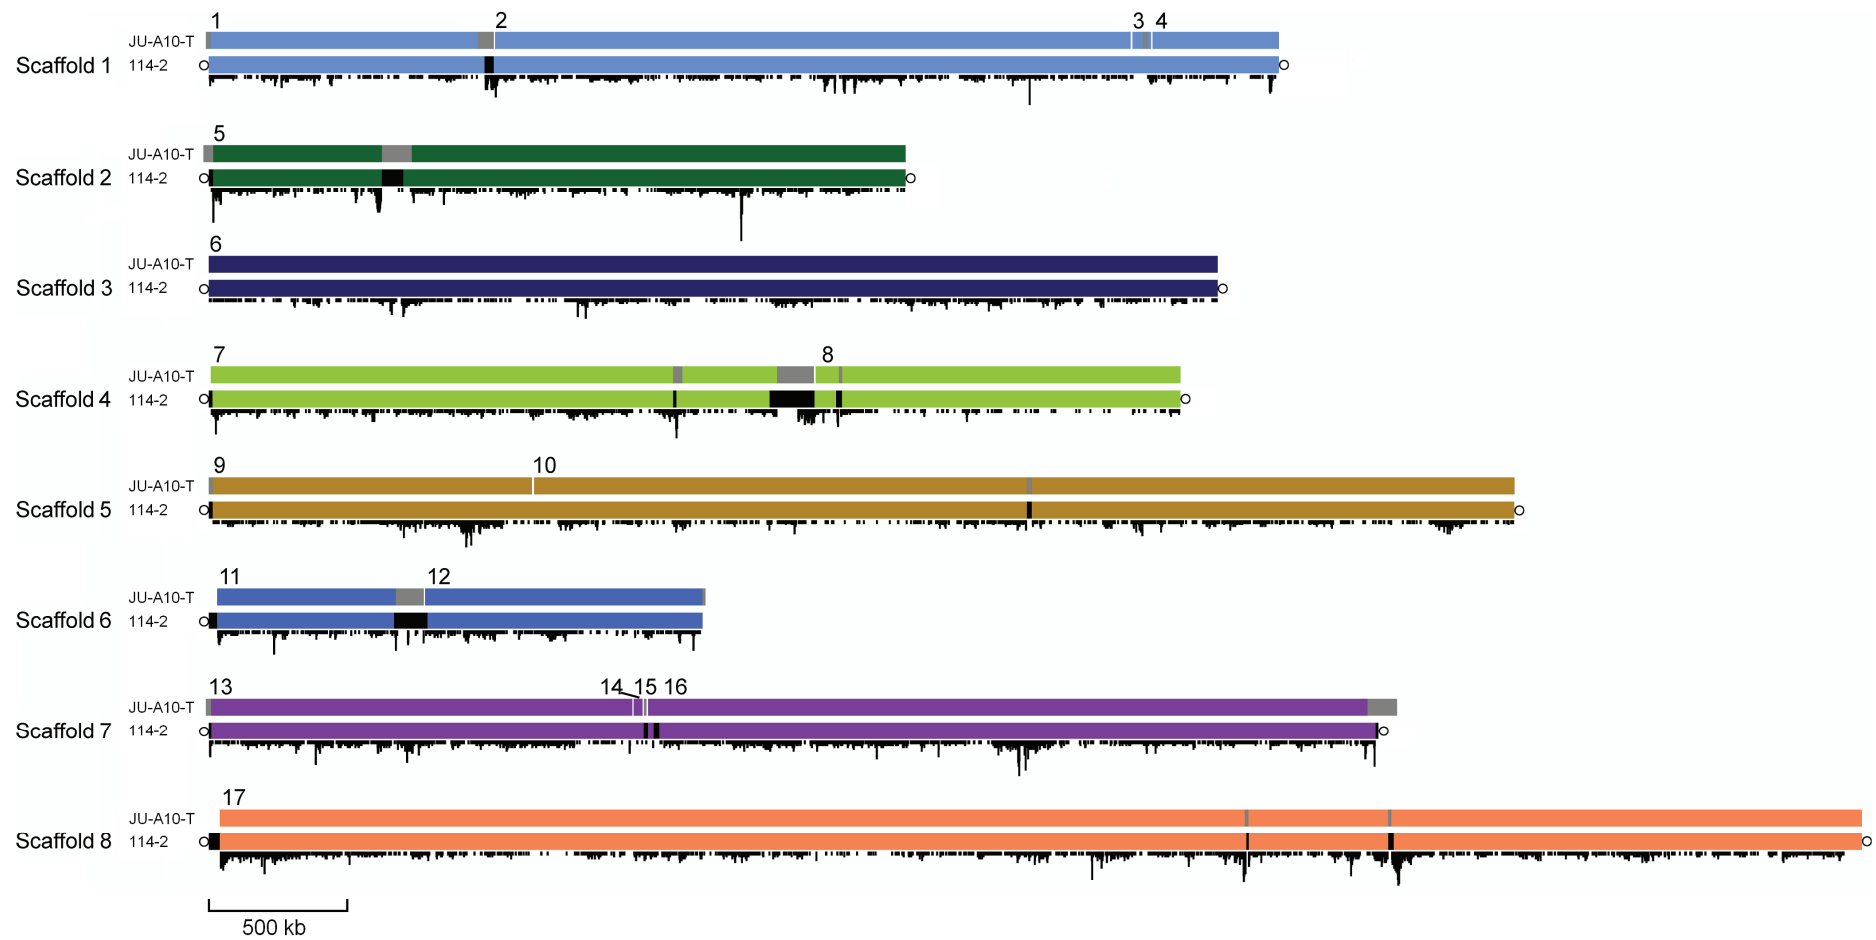

**Figure S1.** Schematic diagram of scaffold mapping.

Single nucleotide variation (SNV) density (black histograms) was calculated using a 100-bp window. Blocks in black and gray indicate strain-specific regions in

114-2 and JU-A10-T, respectively. Scaffold ends with telomeric repeats in 114-2 are indicated by hollow black circles. Five small scaffolds (Scaffold 18 to 22) in JU-A10-T could not be mapped to the 114-2 genome and are not shown here. Scaffold 23 (1,222-bp long) of JU-A10-T was mapped to Scaffold 2 (1514726–1515948) of 114-2, while a gap existed in the corresponding region of JU-A10-T Scaffold 5.

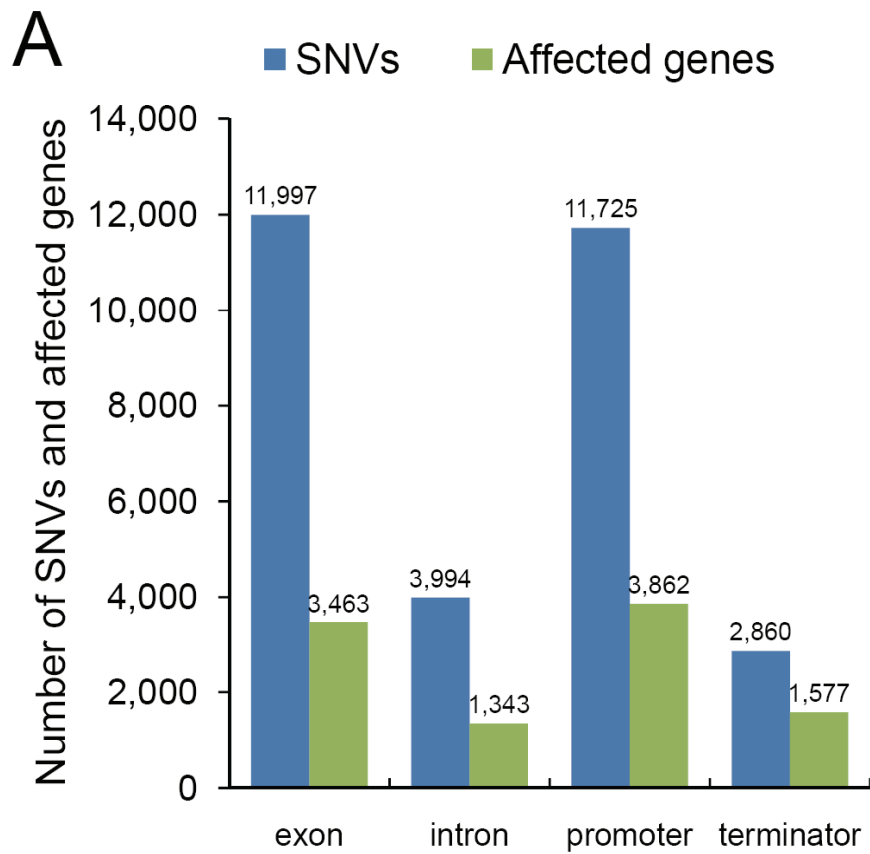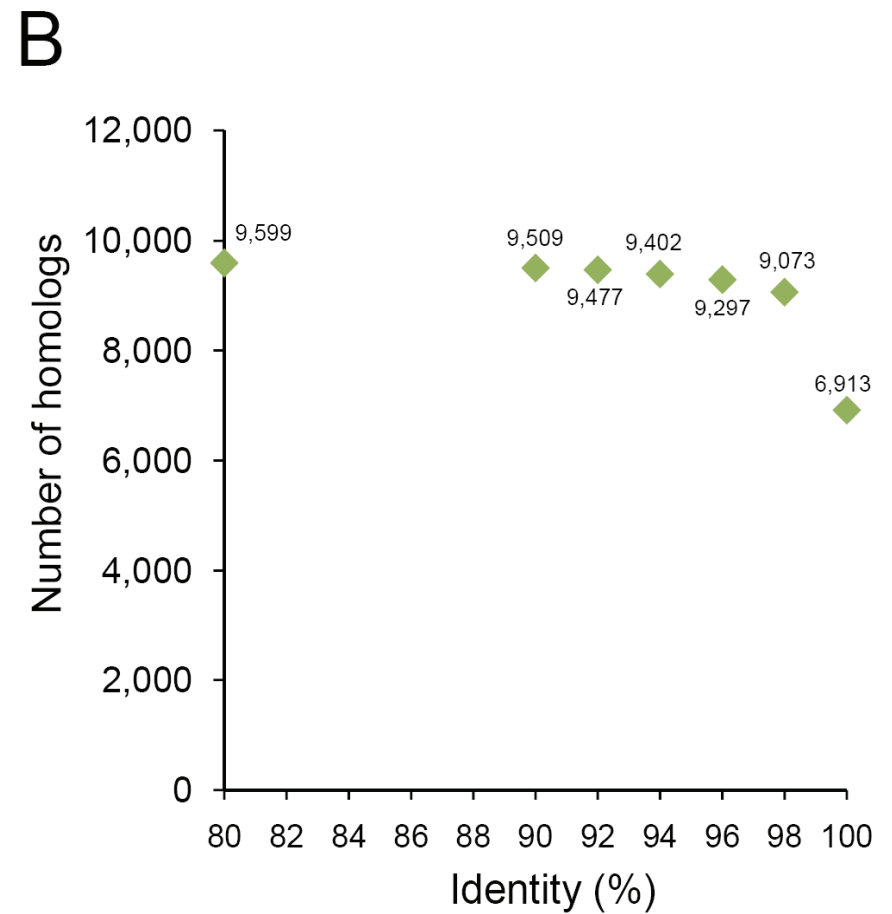

**Figure S2.** Genetic variations between strains 114-2 and JU-A10-T.

(A) Single nucleotide variations (SNVs) and affected genes between 114-2 and JU-A10-T. SNVs in exons, introns, 1,000 bp-long upstream promoters or 200 bp-long downstream terminators were all analyzed. Note that one SNV may affect more than one gene, and one gene may contain SNVs at different regions (e.g. both exons



and introns). **(B)** Numbers of proteins of different sequence identities between 114-2 and JU-A10-T (alignment coverage  $\geq 80\%$ ).

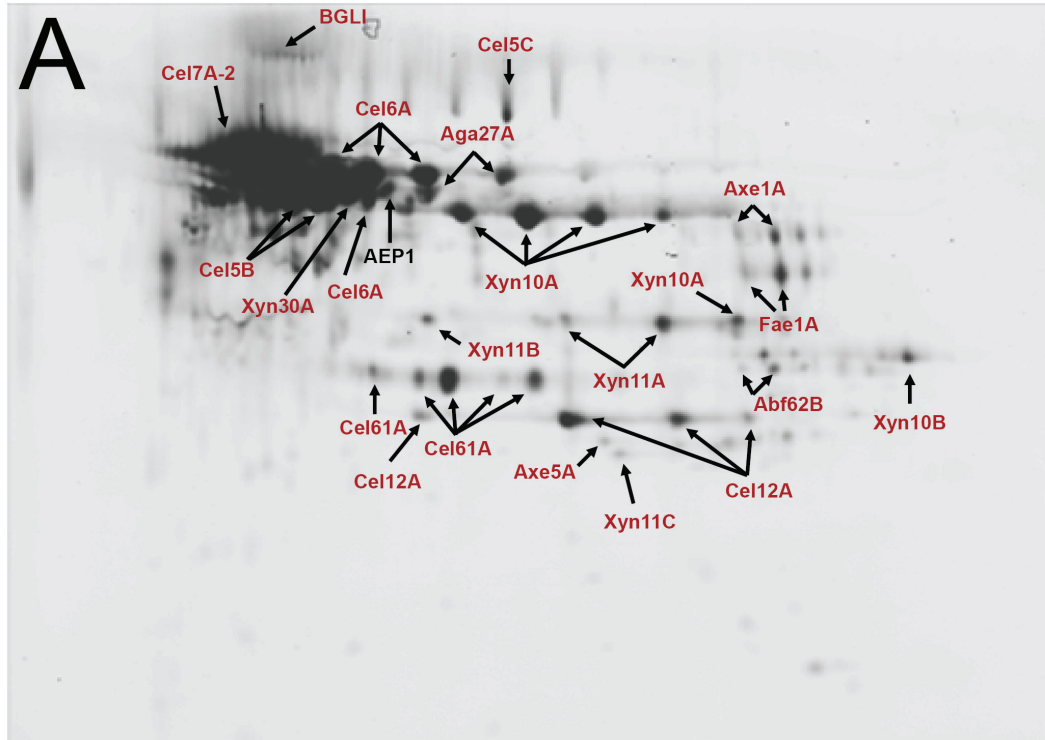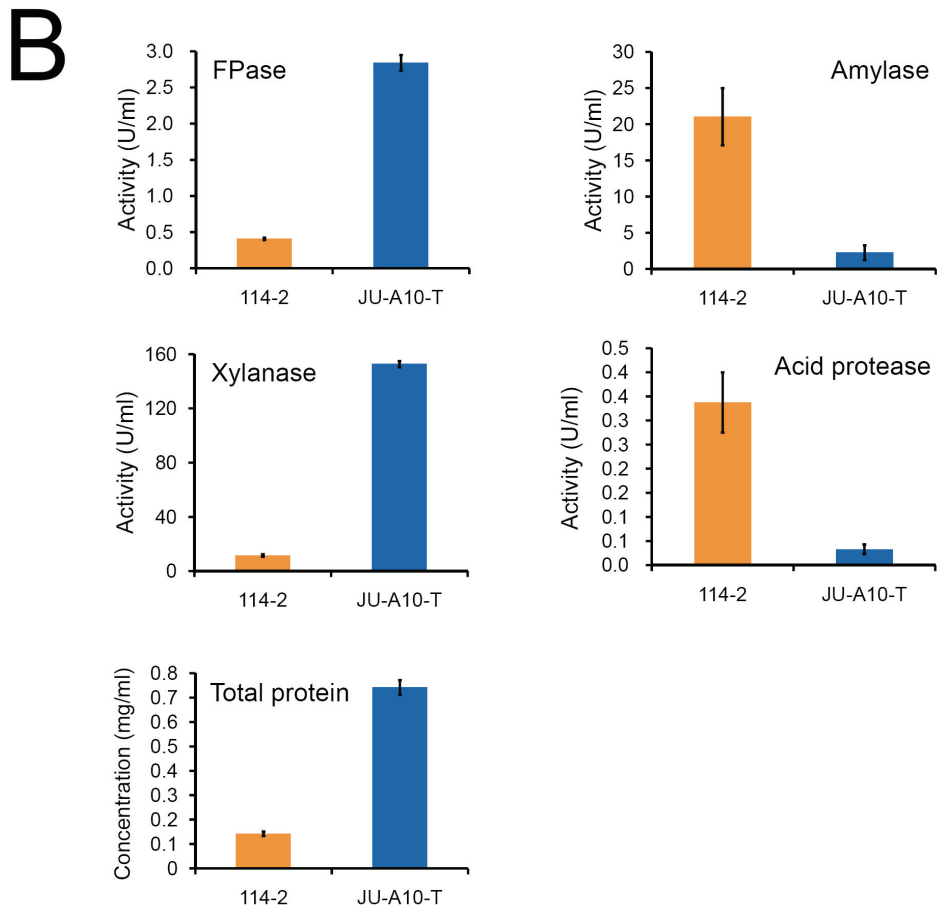

**Figure S3.** Characters of the secretome of *P. decumbens* JU-A10-T grown in cellulose-wheat bran medium for 48 h.

(A) Two-dimensional electrophoresis map of the JU-A10-T secretome. Lignocellulolytic enzymes

are indicated in red color. **(B)** Extracellular hydrolase activities of JU-A10-T in comparison with those in 114-2. Error bars represent standard deviations of triplicate independent cultures.

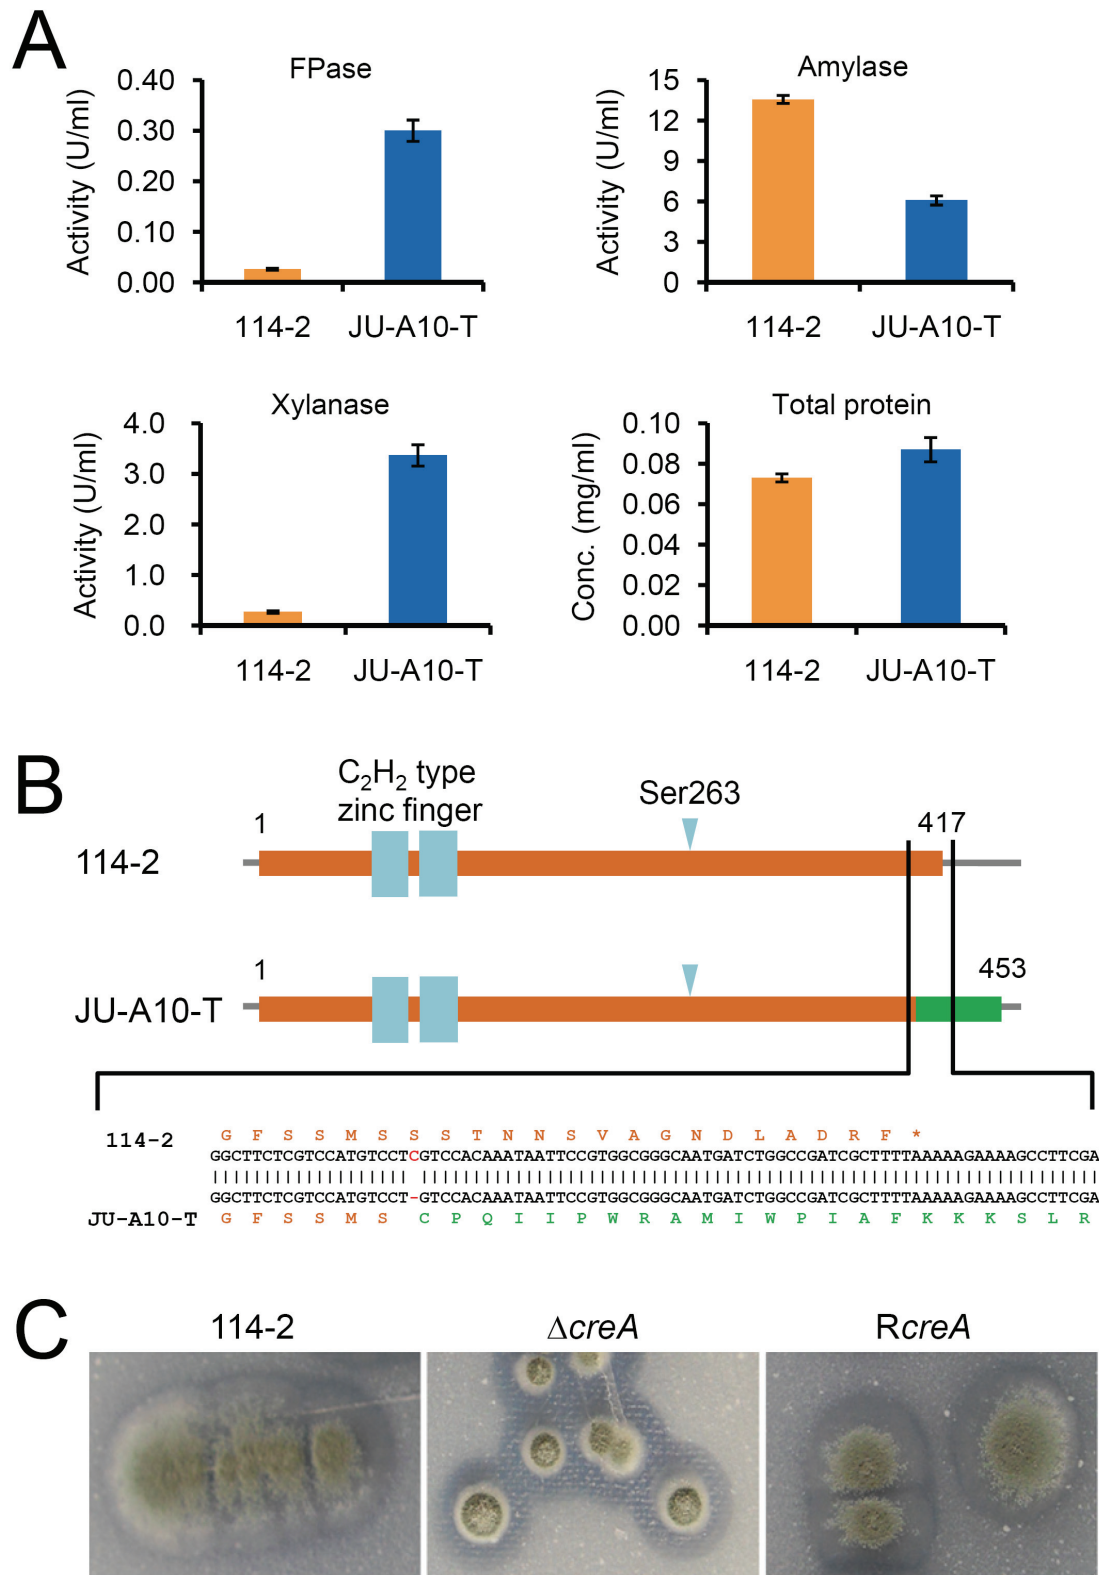

**Figure S4.** Carbon catabolite repression-resistant expression of lignocellulolytic enzymes in *P. decumbens*.

(A) Extracellular hydrolase activities of 114-2 and JU-A10-T grown in glucose medium for 48 h.

(B) Schematic diagram of the sequence variation in *creA*. The frameshift mutation is shown in red.

C<sub>2</sub>H<sub>2</sub> zinc finger DNA-binding domain and the predicted phosphorylation site Ser263 are indicated in the figure. (C) Effect of *creA* upon cellulase production in the presence of glucose. Strain  $\Delta creA$  was generated by deleting *creA* in 114-2, and R*creA* was obtained by retransformation of *creA* expression cassette into  $\Delta creA$  via homologous recombination. Strains were grown on medium containing 0.5% (w/v) glucose and 0.5% (w/v) ball-milled cellulose. Note that the ratio of hydrolytic halo diameter to colony diameter of  $\Delta creA$  is higher than those of 114-2 and R*creA*.

```

114-2 -1500 AAGTCATCCTGAGGTGGTGACAGTAAAGATGAAGTTGATCATTACCGCCTTGTAGTAATTCCTCCTTGTATATGCAAGTGACAGAAAGCGTTATAATCA -1401
JU-A10-T -1500 .....-1401

114-2 -1400 CAGGGTGTCTCCCCGCAAATTGCGATCGACAGTCGCCAAGATGAAGAGGCGCTGACGTCCCCTCTTCGTCCTCCGACCCCATCACTTTTGACCCTGGCCGA -1301
JU-A10-T -1400 .....A.....-1301

114-2 -1300 TTGAGTTTAAACGGCATCTTGAAGAGCACTCACCTAGTGATAATTGACTAAGATGGTCTTCTGATCTGTGTGATGAATCTTCTACAAAATTCGGTTGCG -1201
JU-A10-T -1300 .....G.....-1201

114-2 -1200 GGAAGGCGCTCACCATTAGACAGGGCAGTGACAATGTTGCTCCTGCTTTCCTCCCTCATCAGAACTAGGAGGCAATGAATCCAGGACATCGCC -1101
JU-A10-T -1200 .....-1101

114-2 -1100 GCTCATGTAAGATAAGCGATCGATGTAATTGCTCCATTAACTTCTCATTACCCAGCGGCTATAGTCCAGTCGGAACGGTAGGGTGATTCATGTTGTT -1001
JU-A10-T -1100 .....T.T.....-1001

114-2 -1000 TCAGTGGGATGTTGAGGAAAGGATTCGGTTTCGAGTAGAAATAATGGAGCAGACCCATGACAAGATTCGCCAAGATCGCCAGGAAAATCACGGGGT -901
JU-A10-T -1000 .....-901

114-2 -900 ATAGTCAGCGCTAAGCTCTCATTTGAAGGATATTTTGCCTTTTCATCCCTCAGACCTGGGAAAATTCGGATATGTGGGATACAGCGCGGATCTGAAAC -801
JU-A10-T -900 .....A.....-801

114-2 -800 GCTCTATGCCAAAACAGCATGCAGAATGCCCGGACAATTCGACGCCGCGGAGCGGGTGTAGTCCCTGCAGAGTGGGATGCTGCTCATGATTGATG -701
JU-A10-T -800 .....A.....T.....-701

114-2 -700 CGGGCGCTTTCAGAAAGCAAACGCCAACGCTTACCAGCCGATGTGGCAGCATGCGCCAGGTGGCGCGCAGCGGATTTAACCTATAGCTCT -601
JU-A10-T -700 .....-601

114-2 -600 AATGAGCTCTGCAGCTGTGTTAGGGTCTTTACCACCTACATCGTACTAGATCTCTTGATATTTGAGTCTCCGCAAGAAGTCTGGCAAGTGAATAGTAT -501
JU-A10-T -600 .....G.....-501

114-2 -500 AGATTTGCATTTCTTTTTCAGCGCAGATCTCCGATGGTATGCCATTTCAAGCTCGGAGATGGGCCGCTTAGCGAGGACCAAAATCGCTAGTCACTAGA -401
JU-A10-T -500 .....A.....-401

114-2 -400 CGATAGCTCATGACTCCAGCAACGAATCTTGACCTGTTGGTGGAGATCAACTTTCTTGGACGATCTTCTCCTCGCTGGCAGTGAAGTCACTCACTCACT -301
JU-A10-T -400 .....-301

114-2 -300 TCATTTTGATGCAGAACGTGGCCATGATTCCTTGAATGCGCTGTCGGAGACCGGCTCTTGTCTTGGCTGAGTTGAACACTCCATCTAGTTTCT -201
JU-A10-T -300 .....C.....-201

114-2 -200 GAACAATATGGCTCGCAGGAGCCACGACAGTCTGTCAATCTGGCAAACCTCGATGAGAGATCTATATAAAGACCTCGGTGCTGCTCCCTCATCTCAA -101
JU-A10-T -200 .....T.....-101

114-2 -100 GAATCATCAACTGCAGGCCAGTGAGACAATCTACTACGCTTCCCTCCCTCATATACAACTTTCATACGTCAGGTCCATCTCCTTTCATTGATCTCCATT -1
JU-A10-T -100 .....-1

```

**Figure S5.** Sequence variations in the promoter region of *cel7A-1*.

Nucleotides are numbered relative to the start codon, and variations between the two strains are shown in red. Single motifs of putative CreA binding sites (5'-SYGGRG-3') are underlined.

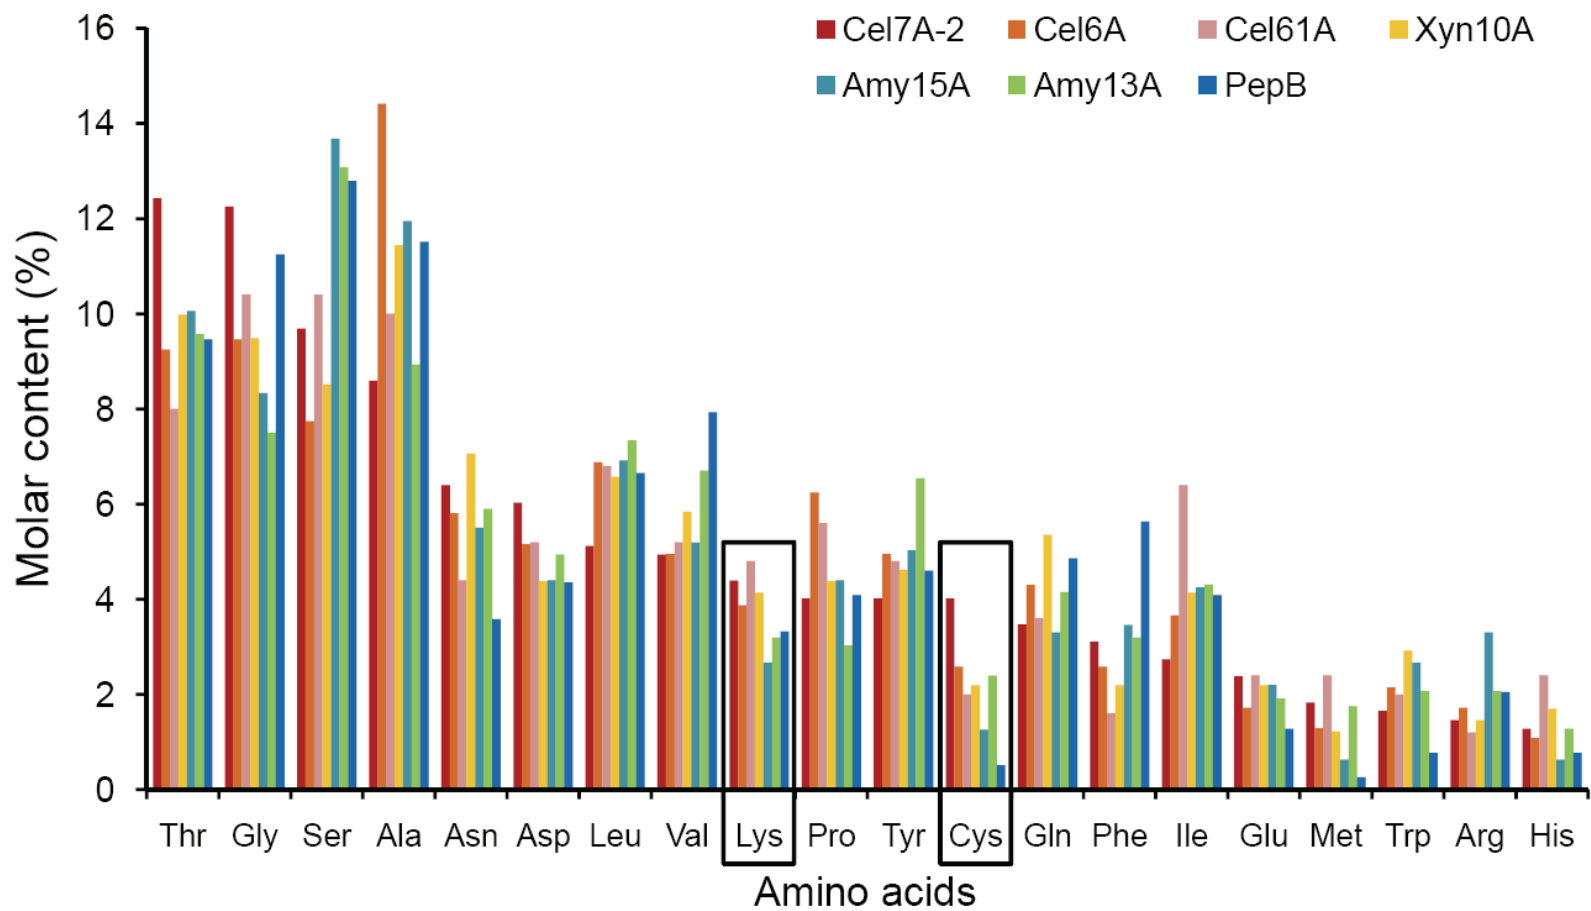

**Figure S6.** Amino acid composition of seven major components of the secretomes of strains 114-2 and JU-A10-T.

Differences in the contents of lysine and cysteine among the proteins are boxed.
